1 RESEARCH ARTICLE

2

3 **dsRNA-induced immunity targets plasmodesmata and is suppressed by**  
4 **viral movement proteins**

5

6 **Caiping Huang<sup>a</sup>, Ana Rocio Sede<sup>a</sup>, Laura Elvira-González<sup>a</sup>, Yan Yan<sup>b</sup>, Miguel**  
7 **Rodriguez<sup>b</sup>, Jerome Mutterer<sup>a</sup>, Emmanuel Boutant<sup>a,c</sup>, Libo Shan<sup>b</sup>, and Manfred**  
8 **Heinlein<sup>a,d</sup>**

9 <sup>a</sup>Institut de biologie moléculaire des plantes, CNRS, Université de Strasbourg, 67000 Strasbourg,  
10 France

11 <sup>b</sup>Department of Biochemistry and Biophysics, College of Agriculture and Life Sciences, Texas A&M  
12 University, College Station, TX 77843, USA

13 <sup>c</sup>Current address: UMR 7021, CNRS, Laboratoire de Bioimagerie et Pathologies, Université de  
14 Strasbourg, Faculté de Pharmacie, 67400 Illkirch, France

15 <sup>d</sup>Corresponding Author: [heinlein@unistra.fr](mailto:heinlein@unistra.fr)

16

17 **Short title:** dsRNA-induced PTI restricts virus movement

18 **One-sentence summary:** dsRNA-induced antiviral PTI targets plasmodesmata for callose deposition  
19 and is suppressed by virus-encoded movement proteins.

20

21 The author responsible for distribution of materials integral to the findings presented in this article in  
22 accordance with the policy described in the Instructions for Authors

23 (<https://academic.oup.com/plcell/pages/General-Instructions>) is: Manfred Heinlein

24 ([heinlein@unistra.fr](mailto:heinlein@unistra.fr)).

25

26 **Abstract**

27 Emerging evidence indicates that in addition to the well-recognized antiviral RNA silencing, dsRNA  
28 elicits responses of pattern-triggered immunity (PTI), likely contributing plant resistance against virus  
29 infections. However, compared to bacterial and fungal elicitor-mediated PTI, the mode-of-action and  
30 signaling pathway of dsRNA-induced defense remain poorly characterized. Here, using multi-color *in*  
31 *vivo* imaging by GFP mobility, staining of callose and plasmodesmal marker lines, we show that  
32 dsRNA-induced PTI restricts the progression of virus infection by triggering callose deposition at  
33 plasmodesmata, thereby likely limiting the macromolecular transport through these cell-to-cell  
34 communication channels. The plasma membrane-resident kinase module of SERK1 and BIK1/PBL1,  
35 plasmodesmata-localized proteins PDL1/2/3 and calmodulin-like CML41, and Ca<sup>2+</sup> signals are  
36 involved in the dsRNA-induced signaling leading to callose deposition at plasmodesmata and antiviral  
37 defense. In addition, unlike classical bacterial elicitor flagellin, dsRNA does not trigger detectable  
38 reactive oxygen species (ROS) burst, further substantiating a partially shared immune signaling  
39 framework with distinct features triggered by different microbial patterns. Likely as a counteract  
40 strategy, viral movement proteins from different viruses suppress the dsRNA-induced host response  
41 leading to callose deposition to achieve infection. Thus, our data support the new model of how plant  
42 immune signaling constrains the virus movement by inducing callose deposition at plasmodesmata  
43 and how viruses counteract this layer of immunity.

44

45 **Keywords:** double-stranded RNA, pattern-triggered immunity, plant virus, plasmodesmata

46

## 47 **IN A NUTSHELL**

48 **Background:** Plants use different defense mechanisms pathogens. The major mechanism that plants  
49 use for defense against viruses is known as RNA silencing. This mechanism is triggered by the  
50 presence of viral double-stranded (ds)RNA and uses small RNAs to inhibit viral replication by  
51 targeting the viral genome for degradation. Recently, it was found that dsRNA elicits antiviral defense  
52 also through a protein-mediated mechanism known as pattern-triggered immunity (PTI). However, the  
53 underlying mechanism of antiviral PTI and how viruses overcome this plant defense mechanism to  
54 cause infection is unknown.

55 **Question:** In this study we asked how dsRNA-induced PTI acts to inhibit virus infection and whether  
56 we can identify components of the PTI signaling pathway. Moreover, we wanted to know how viruses  
57 overcome this plant host defense response in order to cause infection.

58 **Findings:** We demonstrate that dsRNA-induced PTI targets plasmodesmata (PD), the intercellular  
59 communication conduits in plant cell walls that viruses use to spread infection from cell to cell. By  
60 inducing the deposition of callose, dsRNA-induced PTI reduces PD permeability, thus restricting  
61 virus movement. We identified PTI signaling components required for dsRNA-induced PD callose  
62 deposition and delineate a PTI pathway showing important difference to PTI pathways triggered by  
63 microbial elicitors. Moreover, viral movement proteins (MPs) suppress the dsRNA-induced callose  
64 deposition response at PD. This leads to a new model of how plant immune signaling constrains virus  
65 movement and how viruses counteract this layer of immunity.

66 **Next steps:** This study calls upon the identification of the PTI dsRNA receptor and the mechanisms  
67 of PTI signaling (involving identified components such as SERK1, BIK1, calcium channels, CML41,  
68 PDL1/2/3) and PTI suppression by MPs, and how dsRNA-induced PTI and RNA silencing are  
69 controlled during the spread of infection.

70

## 71 **Introduction**

72 The virome of plants is dominated by RNA viruses (Dolja et al., 2020) and several of these cause  
73 devastating diseases in cultivated plants leading to global crop losses (Jones and Naidu, 2019; Jones,  
74 2021). To infect plants, RNA viruses engage in complex interactions with compatible plant hosts. In  
75 cells at the spreading infection front, RNA viruses associate with cellular membranes and replicate  
76 their genome through double-stranded RNA (dsRNA) intermediates. Moreover, they use their  
77 movement proteins (MP) to interact with membrane-associated transport processes in order to achieve  
78 the movement of replicated genome copies through cell wall nanochannels called plasmodesmata  
79 (PD) in order to infect new cells (Heinlein, 2015). Importantly, sensing of viral dsRNA by the host  
80 triggers defense responses against infection, which viruses must be able to control in order to  
81 propagate.

82

83 The most important antiviral host response in plants is RNA silencing (Ding and Voinnet, 2007). It  
84 involves host DICER-LIKE enzymes that inhibit viral replication by cleaving the viral dsRNA  
85 replication intermediate into small interfering RNAs (siRNAs). These viral siRNAs can associate with  
86 ARGONAUTE proteins in RNA-induced silencing complexes (RISCs) to further guide the sequence-  
87 specific degradation and translational suppression of viral RNA. To control this antiviral response and  
88 to enhance their replication, viruses have evolved specific effector proteins that interfere with the  
89 RNA silencing pathway at distinct steps (Csorba et al., 2015). More recent research has shown that in  
90 addition to the antiviral RNA silencing response, RNA virus infection also activates pattern-triggered  
91 immunity (PTI) (Kørner et al., 2013), whereby dsRNA acts as an important elicitor (Niehl et al.,  
92 2016). Unlike RNA silencing, PTI is triggered by specific recognition of conserved microbe- or  
93 pathogen-associated molecular patterns (MAMPs or PAMPs) by pathogen-recognition receptors  
94 (PRRs) and the induction of defense signaling (DeFalco and Zipfel, 2021). Importantly, dsRNA-  
95 induced PTI is independent of dsRNA sequence. Thus, PTI is activated by viral dsRNA but also as  
96 well by non-viral dsRNA, for example GFP dsRNA or the synthetic dsRNA analog polyinosinic-  
97 polycytidilic acid [poly(I:C)] (Niehl et al., 2016), a well-known ligand of the dsRNA-perceiving  
98 TLR3-receptor in animals (Alexopoulou et al., 2001). Similar to virus replication, treatment of  
99 *Arabidopsis thaliana* plants with poly(I:C) elicits antiviral defense along with activating typical PTI  
100 responses, such as mitogen-activated protein kinase (MPK), ethylene production, seedling root growth  
101 inhibition, and marker gene expression (Kørner et al., 2013; Niehl et al., 2016). Poly(I:C)-triggered  
102 ethylene production and antiviral defense were shown to depend on the co-receptor kinase SOMATIC  
103 EMBRYOGENESIS RECEPTOR-LIKE KINASE 1 (SERK1) (Niehl et al., 2016) but neither other  
104 components of the signaling pathway nor the mechanism by which PTI restricts virus infection are  
105 known. Here, we demonstrate that unlike RNA silencing, which controls viral RNA accumulation,  
106 dsRNA-induced PTI acts on PD to restrict virus movement. New components of the PTI signaling  
107 mechanism to PD are identified and shown to be critical for limiting virus infection and symptom  
108 formation. Moreover, the observations indicate that the cell-to-cell propagation of virus infection is  
109 linked to the ability of the viral MP to suppress the dsRNA-induced defense response leading to PD  
110 closure. Taken together, the results draw a central role of PTI signaling and suppression in  
111 determining the ability of viruses to spread infection between cells in susceptible plants.

112

## 113 **Results**

114

### 115 **dsRNA causes inhibition of virus movement in *N. benthamiana***

116 To discover how dsRNA-induced PTI inhibits RNA virus infection, we visualized the effect of  
117 poly(I:C) treatment on local infections of *Nicotiana benthamiana* plants using tobacco mosaic virus  
118 tagged with green fluorescent protein (TMV-GFP). The TMV-GFP infection sites were lower in

119 number and smaller at 7 days post inoculation (dpi) in plants treated with poly(I:C) or with a bacterial  
120 PTI elicitor derived from flagellin (flg22) than in control plants treated with water (**Figure 1, A and**  
121 **B, and Figure S1**). The treatments did not cause a significant change in GFP fluorescence intensity,  
122 an indicative for viral replication and accumulation (**Figure 1A**) indicating that they may not exert a  
123 significant bulk effect on viral RNA accumulation in infected cells. To test this further, we measured  
124 the accumulation of viral RNA in leaves agroinfiltrated for expression a cell-autonomous, MP-  
125 deficient TMV replicon (TMV $\Delta$ M $\Delta$ C-GFP). As is shown in **Figure 1C**, pre-treatment of the leaves  
126 with poly(I:C) did not elicit a significant effect on TMV $\Delta$ M $\Delta$ C-GFP viral accumulation through a  
127 time-course of infection at 1, 3, and 5 days post infection (dpi) compared to leaves treated with water.  
128 Therefore, the reduced size and number of infection sites in poly(I:C)-treated leaves suggested that the  
129 poly(I:C)-triggered immunity may be linked to the reduced cell-to-cell movement of the virus.

130

### 131 **dsRNA triggers callose deposition at PD along with the activation of typical PTI responses in *N.*** 132 ***benthamiana***

133 Because virus intercellular movement occurs through PD (Heinlein, 2015) we hypothesized that  
134 dsRNA inhibits virus movement by causing PD closure. A major mechanism restricting the  
135 conductivity of PD for the transport of macromolecules involves the deposition of callose ( $\beta$ -1,3-  
136 glucan) in the cell wall region surrounding the PD channel (Wu et al., 2018). Consistently, treatment  
137 of *N. benthamiana* plants with poly(I:C), flg22, or water, and quantification of PD-associated callose  
138 by *in vivo* aniline blue staining (Huang et al., 2022) revealed that both poly(I:C) and flg22 trigger  
139 increased levels of PD-associated callose in a concentration-dependent manner (**Figure 1, D and E**).  
140 A similar induction of callose at PD is also seen upon treatment of *N. benthamiana* plants with Phi6  
141 dsRNA (Niehl et al., 2018) (**Figure 1F**), which dismisses the possibility that poly(I:C) induced callose  
142 deposition through an unspecific effect. In agreement with poly(I:C)-induced callose deposition at  
143 PD, poly(I:C)-treated tissues showed reduced PD permeability as determined by a GFP mobility  
144 assay. In this assay, isolated individual cells of *N. benthamiana* leaves were transformed for the  
145 expression of cytoplasmic GFP together with red fluorescent protein tagged with a nuclear  
146 localization signal (NLS-RFP) as a red fluorescent cell-autonomous marker. Whereas more than 97%  
147 of the observed GFP-expressing cells showed GFP mobility into one or two adjacent cell layers in  
148 control (water)-treated tissues, this mobility was reduced to 31% in the presence of poly(I:C) (**Figure**  
149 **1, G - I**). Moreover, as previously noted in Arabidopsis (Niehl et al., 2016), poly(I:C) triggered a  
150 moderate MPK activation and the level of activation is significantly weaker than the activation  
151 observed with flg22 (**Figure 1J**). Poly(I:C)-treated leaves also exhibited the induction of *N.*  
152 *benthamiana* defense-related genes, such as genes encoding BOTRYTIS INDUCED KINASE1  
153 (BIK1), PATHOGENESIS-RELATED PROTEIN 2 (PR2), NADPH/RESPIRATORY BURST  
154 OXIDASE PROTEIN B (RBOHB) and ENHANCED DISEASE SUSCEPTIBILITY 1 (EDS1),



155 whereas the gene for BRASSINOSTEROID INSENSITIVE 1 (BRI1) was down-regulated  
156 (**Figure 1K**).

157

158 **Poly(I:C)-induced PD callose deposition in Arabidopsis requires PTI signaling components but**  
159 **is independent of ROS and MPK**

160 To determine how dsRNA elicits the deposition of callose at PD, we turned our attention to  
161 Arabidopsis. As noted previously (Niehl et al., 2016) the treatment of *A. thaliana* Col-0 plants with  
162 poly(I:C) causes a significant induction in some PTI-related gene expression, including *SERK1*  
163 (**Figure 2A**), whereby the induction of *PR5* was found to be SERK1-dependent (**Figure 2B**).  
164 Moreover, the same treatment as well as the treatment with 50 ng/μl phi6 dsRNA increased the PD-  
165 associated callose levels as seen before in *N. benthamiana* (**Figure 2, C and D**). The induced callose  
166 depositions are exactly localized to PD as shown in transgenic *A. thaliana* Col-0 plants expressing PD  
167 markers PLASMODESMATA CALLOSE BINDING 1 fused to the red fluorescent protein  
168 mCHERRY (mCherry-PDCB1) or the Plasmodesmata-localized β-1,3 glucanase 2 fused to the yellow  
169 fluorescent protein mCitrine (PdBG2-mCitrine) (Benitez-Alfonso et al., 2013) (**Figure 2, E and F**).  
170 Interestingly, dsRNA-induced callose deposition was strongly inhibited in *bik1 pbl1* plants (**Figure**  
171 **2G**), which are deficient in the receptor-like cytoplasmic kinase (RLCK) BIK1 and its homolog  
172 PBS1-LIKE KINASE1 (PBL1). The BIK1 receptor-like cytoplasmic kinase (RLCK) module is an  
173 important component of PTI signaling that integrates signals from multiple pathogen-recognition  
174 receptors (PRRs), as shown by its direct interaction with the PRR proteins FLAGELLIN SENSITIVE  
175 2 (FLS2), EF-TU RECEPTOR (EFR), PEPTIDE RECEPTOR (PEPR)1 and PEPR2, and CHITIN  
176 ELICITOR RECEPTOR KINASE 1 (CERK1) (Lu et al., 2010; Zhang et al., 2010; Liu et al., 2013),  
177 and its ability to phosphorylate and activate downstream targets, such as the NADPH Oxidase  
178 RESPIRATORY BURST OXIDASE HOMOLOG D (RBOHD) (Kadota et al., 2014). BIK1 and  
179 PBL1 have additive effects; unlike the single mutants, the *bik1 pbl1* double mutant was shown to  
180 strongly inhibit PAMP-induced defense responses (Zhang et al., 2010). In addition, *bik1 pbl1* plants  
181 are also deficient in poly(I:C)-induced MPK activation and seedling root growth inhibition as  
182 compared to Col-0 wild type (WT) plants (**Figure 2, H and I**).

183 Perception of flg22 by the FLS2 and BAK1 (BRASSINOSTEROID INSENSITIVE1 (BRI1)-  
184 ASSOCIATED RECEPTOR KINASE1) co-receptor complex induces rapid phosphorylation of BIK1,  
185 evidenced by a protein mobility shift in immunoblotting analysis (Lu et al., 2010; Zhang et al., 2010).  
186 To determine if BIK1 is phosphorylated in the presence of poly(I:C), Arabidopsis WT Col-0  
187 protoplasts expressing HA epitope-tagged BIK1 were treated with poly(I:C) for 20 minutes.  
188 Subsequent Western blot analysis with anti HA-antibody revealed that similar to flg22 treatment,  
189 poly(I:C) treatment induces a mobility shift of BIK1-HA proteins (**Figure 3A**). BIK1 phosphorylation  
190 was confirmed by the absence of this mobility shift in the presence of calf intestine phosphatase (CIP)  
191 (**Figure 3, A and B**) or the protein kinase inhibitor K-252a (**Figure 3B**). Taken together, the data

192 suggest the involvement of BIK1/PBL1 in dsRNA-triggered immunity mediating the callose  
193 deposition at the PD.

194 Previously, we showed that *serk1-1* mutants show the reduced levels of poly(I:C)-induced  
195 ethylene production and antiviral protection [Niehl, 2016 #6670]. We further investigated the  
196 involvement of SERK1 in poly(I:C)-induced BIK1 phosphorylation. As is shown in **Figure 3C**, the  
197 level of poly(I:C)-induced BIK1 phosphorylation was increased upon SERK1 overexpression in WT  
198 Col-0 plants and decreased in the *serk1-1* mutant. Importantly, the poly(I:C)-induced PD callose  
199 deposition was drastically reduced in *serk1-1* mutants compared to WT Col-0 plants (**Figure 3D** and  
200 **E**). Whereas the median PD callose level increased by 48% in WT col-0 plants upon poly(I:C)  
201 treatment, only a minor increase in the median PD callose level was observed in the *serk1* mutant.  
202 Thus, the data indicate that SERK1 contributes to poly(I:C)-induced BIK1 phosphorylation and may  
203 function genetically upstream of BIK1.

204 To investigate the poly(I:C)-induced signaling pathway downstream of BIK1, we examined the  
205 production of reactive oxygen species (ROS) by a luminescence assay. ROS play important roles in  
206 plant development and stress responses (Mittler, 2017) and are also produced during infections with  
207 fungal and bacterial pathogens (Castro et al., 2021). ROS accumulate also upon perception of the  
208 fungal and bacterial elicitors chitin and flagellin (flg22) (Nuhse et al., 2007; Cheval et al., 2020) and  
209 have been linked to local and systemic signaling, including calcium signaling, and the deposition of  
210 callose at PD (Faulkner et al., 2013; Cheval et al., 2020). Notably, neither the treatment of  
211 Arabidopsis Col-0 plants (**Figure 4A**) nor the treatment of *N. benthamiana* plants (**Figure 4B**) with  
212 poly(I:C) led to the production of ROS. By contrast, strong responses were recorded in both plant  
213 species upon treatment with the flg22 elicitor. In addition, *rbohD* and *rbohF* mutants deficient for the  
214 major ROS-producing NADPH oxidases RESPIRATORY BURST OXIDASE HOMOLOG D  
215 (RBOHD) and RBOHF (Castro et al., 2021) responded like WT Col-0 plants to the presence of  
216 poly(I:C) in showing induced callose deposition at PD (**Figure 4C**). Thus, unlike for chitin and  
217 flagellin (flg22), the induction of PD callose deposition by poly(I:C) is likely independent of ROS.  
218 Moreover, *mpk3* and *mpk6* single mutants that are deficient for the mitogen activated protein kinases  
219 (MPK) 3 and 6, respectively, as well as the *mpk3 amiRmpk6* mutants (an *mpk3* mutant in which  
220 *MPK6* is silenced by an artificial miRNA) (Li et al., 2014) showed increased levels of callose at PD  
221 upon poly(I:C) treatment similar to WT plants (**Figure 4D**). Considering the relatively weak  
222 activation of MPKs by poly(I:C) treatment (**Figure 1J** and **Figure 2H**), it is possible that the MPK3/6  
223 module may not play a major role in dsRNA-induced callose deposition. Alternatively, it is also  
224 possible that additional yet non-identified MPKs may be involved in this process.

225 To further investigate the signaling pathway induced by dsRNA, additional mutants were tested.  
226 We started with Arabidopsis mutants deficient in the PD-localized proteins (PDLPs), which are a  
227 family of eight proteins that dynamically regulate PD (Thomas et al., 2008). PDLP5 plays a non-  
228 redundant role in intercellular systemic acquired resistance (SAR) signaling (Lim et al., 2016) and in

229 mediating salicylic acid (SA)-induced PD closure, a process required for resistance against the  
230 bacterial pathogen *P. syringae* (Lee et al., 2011; Wang et al., 2013). However, *pdlp5* mutant plants  
231 showed strong callose deposition at PD upon poly(I:C) treatment (**Figure 4E**), indicating that dsRNA-  
232 induced callose deposition is independent of PDLP5 and of a potential SA response mediated by this  
233 protein. Next, we tested a PDLP1, PDLP2 and PDLP3, which play redundant roles in callose  
234 deposition at PD (Thomas et al., 2008), in callose deposition within haustoria formed in response to  
235 infection by mildew fungus (Caillaud et al., 2014), and also as binding receptors for tubule-forming  
236 viruses (Amari et al., 2010). Whereas *pdlp1 pdlp2 (pdlp1,2)* and *pdlp1 pdlp3 (pdlp1,3)* double  
237 mutants showed a normal poly(I:C)-induced callose deposition, *pdlp1 pdlp2 pdlp3 (pdlp1,2,3)* triple  
238 mutant plants were unable to significantly increase PD-associated callose levels in response to  
239 poly(I:C) (**Figure 4E**). This observation suggests the involvement of PDLP1, PDLP2 and PDLP3 in  
240 dsRNA-triggered immunity and in mediating the callose deposition at the PD.

241  
242 In further screening of other mutants for dsRNA sensitivity, we found that poly(I:C)-induced callose  
243 deposition at PD also depends on the Ca<sup>2+</sup>-binding, PD-localized CALMODULIN-LIKE protein 41  
244 (CML41). This protein was shown to mediate rapid callose deposition at PD associated with a  
245 decreased PD permeability following flg22 treatment (Xu et al., 2017). Plants of *CML41*  
246 overexpressing transgenic lines (*CML41-OEX-2* and *CML41-OEX-12*) (Xu et al., 2017) showed  
247 increased PD-associated callose levels upon poly(I:C) treatment similar to WT Col-0 plants (**Figure**  
248 **4F**). In contrast, transgenic plant lines in which *CML41* is downregulated by an artificial miRNA  
249 (*CML41-miRNA-1* and *CML41-miRNA-4*) (Xu et al., 2017) showed a seven- to eight-fold lower  
250 ability to respond to this treatment as compared to WT Col-0 (**Figure 4F**). The reduction in the  
251 response to poly(I:C) of *CML41-miRNA* plants correlates with the reduced level of *CML41*  
252 expression in these lines (Xu et al., 2017) (**Figure 4G**). Consistent with the role of CML41 in the  
253 callose deposition response to poly(I:C), the permeability of PD was previously shown to be sensitive  
254 to cytosolic Ca<sup>2+</sup> concentrations (Tucker and Boss, 1996; Holdaway-Clarke et al., 2000). To test the  
255 role of Ca<sup>2+</sup> in dsRNA-triggered innate immunity, we treated plants with poly(I:C) together with  
256 EGTA, a Ca<sup>2+</sup>-chelating molecule. The level of callose induced at PD after dsRNA treatment was  
257 reduced in the presence of EGTA in a concentration-dependent manner (**Figure 4H**), indicating a role  
258 of Ca<sup>2+</sup> in poly(I:C)-triggered PD regulation. Together, these results suggest a role for CML41 and  
259 Ca<sup>2+</sup> in the poly(I:C)-induced defense response at PD. The observation that the poly(I:C)-induced  
260 callose levels were not significantly increased by *CML41* overexpression may be due to that the  
261 endogenous level of *CML41* expression in WT plants is sufficient for the full activity of the PD-  
262 localized CML41 proteins. However, the level of expression in WT plants is critical as a reduction in  
263 *CML41* levels strongly affected PD callose levels.

264

265 **BIK1/PBL1 and CML41 are essential for dsRNA-induced antiviral resistance**

266 Previously, we showed that poly(I:C) co-treatment during virus inoculation protects Arabidopsis  
267 plants against infection by oilseed rape mosaic virus (ORMV) and that efficient protection depends on  
268 SERK1 (Niehl et al., 2016). As we demonstrate here, SERK1 plays an essential role in the poly(I:C)-  
269 induced callose deposition at PD, implying a role of PD closure in dsRNA-induced antiviral  
270 resistance. To further test the significance of PD callose deposition of BIK1/PBL1 and CML41 in  
271 dsRNA-induced antiviral resistance, we inoculated poly(I:C)-treated and non-treated *bik1 pbl1* and  
272 *CML41 amiRNA-1* plants with ORMV. Whereas poly(I:C) treatment prevented symptoms at 28 dpi  
273 and resulted in a strongly reduced virus titer in WT Col-0 plants, *bik1 pbl1* and *CML41 amiRNA-1*  
274 plants showed severe virus-infected symptoms and accumulated high virus levels in poly(I:C)-treated  
275 plants similar to those plants without poly(I:C) treatment upon ORMV infection (**Figure 5, A and B**).  
276 Ablation of virus-inoculated leaves from plants at different times after inoculation showed that the  
277 time required for the virus to exit the inoculated leaf and to cause systemic infection was three days in  
278 WT plants. By contrast, this time was reduced to 24 hours in *bik1 pbl1* mutants and *CML41-amiRNA-1*  
279 plants (**Figure 5, C and D**). These findings show that dsRNA-induced antiviral PTI occurs at the  
280 level of virus movement. Consistent with this PTI effect on virus movement, the experiments reveal a  
281 dsRNA-induced signaling pathway that requires SERK1, BIK1/PBL1, CML41, Ca<sup>2+</sup> and PDL1/2/3  
282 for callose deposition at PD. This dsRNA-induced callose deposition at PD is likely independent of  
283 ROS and MPK3/6 signaling, which differs from the immune signaling triggered by fungal and  
284 bacterial elicitors (Kadota et al., 2014; Cheval et al., 2020).

285

### 286 **dsRNA-induced callose deposition is suppressed by viral movement protein**

287 The plant-pathogen arms race causes pathogens to evolve virulent effectors that overcome host  
288 defenses. Viral MPs are essential in mediating virus movement during infection. We tested whether  
289 viral MPs are involved in the suppression of the dsRNA-induced callose deposition at PD. To address  
290 this question, we divided the local TMV infection site into different zones (**Figure 6A**): zone I ahead  
291 of infection and without MP, zone II at the virus front where MP facilitates virus movement, zone III  
292 behind the infection front, and zone IV, which is the center of the infection site where MP is no longer  
293 expressed. *In vivo* detection of dsRNA with GFP-fused dsRNA-binding protein B2 of *Flock house*  
294 *virus* (Monsion et al., 2018) shows that zones II-IV accumulate dsRNA in distinct replication  
295 complexes that also produce MP (**Figure 6B**). Aniline blue staining demonstrates high PD-associated  
296 callose levels within and around the infection site (**Figure 6C**). However, cells in zone II and zone III,  
297 where virus cell-to-cell movement is associated with a transient activity of MP in increasing the PD  
298 size exclusion limit (SEL) (Oparka et al., 1997), exhibit a marked reduction in PD-associated callose  
299 levels as compared to cells in zone I (ahead of infection) and zone IV (center of infection) (**Figure 6,**  
300 **C and D**). The low level of PD-associated callose in cells at the virus front (zone II) is consistent with  
301 the ability of MP to interfere with dsRNA-triggered immunity leading to PD closure.

302

303 To test this hypothesis, we examined whether the expression of MP causes suppression of the  
304 poly(I:C)-induced callose deposition at PD in the absence of viral infection. Transgenic *N.*  
305 *benthamiana* plants that stably express MP:RFP at PD (**Figure 7, A and B**) complement a MP-  
306 deficient TMV mutant for movement, thus indicating that the MP:RFP in these plants is functional  
307 (**Figure 7C**). Treatment of such plants with poly(I:C) led to a 50% lower induction of callose  
308 deposition at PD as compared to WT plants (**Figure 7, D and E**). The ability of poly(I:C) treatment to  
309 induce callose deposition at PD was also reduced upon transient expression of MP:GFP (**Figure 7, F**  
310 and **G**). Importantly, the same effect was observed with MP<sup>C55</sup>:GFP. This mutant MP lacks 55 amino  
311 acids from the C-terminus but still accumulates at PD and is functional in TMV movement (Boyko et  
312 al., 2000). By contrast, dysfunctional MP<sup>P81S</sup> carrying a P to S substitution at amino acid position 81,  
313 which fails to target PD and to support virus movement (Boyko et al., 2002), does not interfere with  
314 poly(I:C)-induced callose deposition. These experiments show that the TMV MP can significantly  
315 interfere with the dsRNA-induced callose deposition at PD, and that this interference requires a MP  
316 that can facilitate virus movement. Consistent with the absence of a significant role of MPK3/6  
317 signaling in poly(I:C) induced callose deposition, expression of MP:GFP or the MP:GFP mutants did  
318 not interfere with flg22 elicitor-triggered MPK activation (**Figure 7H**). Interestingly, MP also reduces  
319 PD callose deposition induced by flg22 (**Figure 7I**), suggesting that MP interferes with signaling or  
320 signaling target mechanisms shared by both elicitors. To determine if also the MPs of other viruses  
321 interfere with the poly(I:C) induction of PD callose deposition, we tested the MPs of ORMV and  
322 turnip vein clearing virus (TVCV). The RFP-fused version of these MPs and of the MP of TMV are  
323 functional as their transient expression in *N. benthamiana* leaves allowed the intercellular spreading  
324 of the co-expressed, MP-deficient TMV $\Delta$ MAC-GFP replicon, as can be seen by the development of  
325 multiple fluorescent foci (**Figure 8A**). Consistent with function, the different MP:RFP fusion proteins  
326 colocalize with PD-associated callose (**Figure 8B**). Importantly, similar to the functional MP:RFP  
327 derived from TMV, the functional MP:RFP fusion proteins derived from ORMV and TVCV reduced  
328 the levels of PD callose deposition induced by poly(I:C) treatment (**Figure 8C**). Thus, the capacity to  
329 interfere with poly(I:C)-induced PD callose deposition may be a widespread function of viral MPs to  
330 achieve efficient infections. These observations also further substantiate the importance of antiviral  
331 PTI in the inhibition of virus movement for plants to fend off virus infections.

332

### 333 **Poly(I:C) enters plant cells**

334 As viruses replicate and produce dsRNA within cells, poly(I:C)-induced responses may only be  
335 relevant to virus infection if poly(I:C) is able to enter cells. To test this, we used B2:GFP as an  
336 intracellular dsRNA localization marker and monitored the responses of B2:GFP-transgenic *N.*  
337 *benthamiana* plants upon poly(I:C) treatment. Externally applied poly(I:C) may enter cells from all  
338 sides and then diffuse into the cytoplasm. Thus, a strong redistribution of B2:GFP similar as in virus-  
339 infected cells, where dsRNA production centers within the VRCs, should not be expected. Indeed,



340 imaging GFP fluorescence under normal conditions did not show obvious changes in the distribution  
341 of B2:GFP between poly(I:C)-treated and water-treated tissues. Nevertheless, by assigning specific  
342 color to low intensity pixels, poly(I:C)-treated tissues clearly showed an accumulation of low intensity  
343 signals along the periphery of the cells (**Figure 9**), thus suggesting poly(I:C) uptake by plant cells.

344

345

## 346 **Discussion**

347

### 348 **dsRNA-induced callose deposition during virus infection**

349 Accumulation and degradation of callose at PD play an essential role in controlling macromolecular  
350 transport between cells (De Storme and Geelen, 2014; Wu et al., 2018). Mutations and conditions that  
351 alter the levels of callose at PD strongly affect the conductivity of PD for macromolecular transport  
352 (Simpson et al., 2009; Guseman et al., 2010; Vaten et al., 2011; Benitez-Alfonso et al., 2013). A role  
353 of callose in plant-virus interactions became apparent by the observation that elevated callose levels in  
354 plants silenced for the callose-degrading enzyme restricted the spread of virus infection, thus  
355 suggesting that PD callose deposition may be part of early defense responses against virus attack  
356 (Beffa et al., 1996). However, how viruses trigger PD callose deposition and yet still maintain their  
357 cell-to-cell movement despite of this host defense response remained open. The induction of callose  
358 deposition at PD by cell-autonomous replication of an MP-deficient TMV replicon led to the  
359 conclusion that virus replication induces “stress” leading to callose deposition at PD (Guenoune-  
360 Gelbart et al., 2008), but the nature of the “stress” and the underlying mechanism remained obscure.  
361 The finding that viruses induce innate immunity (Kørner et al., 2013) and that dsRNA is a potent  
362 PAMP elicitor in plants (Niehl et al., 2016) suggests dsRNA as a potential candidate for the perceived  
363 stress signal. Our data shown here that dsRNA-induced immunity is linked to PD callose deposition  
364 raise a model that virus replication causes callose deposition and PD closure mediated through a PTI  
365 response triggered by viral dsRNA.

366

### 367 **MP facilitates virus movement by suppressing a dsRNA-induced PTI response**

368 Because virus movement depends on prior replication of the viral genome (Christensen et al., 2009),  
369 and given that the virus must continue to replicate to produce progeny, the PTI response is likely  
370 triggered immediately in the newly infected cells at the infection front and maintained in cells behind  
371 the front. Thus, the perception of dsRNA may target PD for closure throughout the infection site. This  
372 mechanism may have evolved to isolate the infected cells from surrounding cells to prevent further  
373 spread of infection but also to protect the virus replication and virus progeny production in the  
374 infected cells against intercellular defense signaling. At the infection front, the dsRNA-producing  
375 virus must nevertheless be able to overcome PD closure in order to spread infection into non-infected  
376 cells. Consistently, pioneering studies with TMV showed that the virus moves between cells with the



377 help of virus-encoded MP, that MP targets PD, and that it increases the size exclusion limit (SEL) of  
378 PD and thus the permeability of the channels for macromolecular trafficking (Citovsky, 1999).  
379 Importantly, using microinjection, MP was shown to gate the PD between cells only at, but not  
380 behind, the virus infection front (Oparka et al., 1997). Our observations link this activity to the  
381 suppression of a dsRNA- induced response by showing (i) that cells at the virus infection front, where  
382 MP increases the PD SEL, have a significantly lower level of callose at PD as compared to other cells  
383 and (ii) that the induction of PD callose deposition by dsRNA [poly(I:C)] is significantly reduced by  
384 ectopically expressed MP. The ability of MP of TMV to interfere with dsRNA-induced callose  
385 deposition seems to reflect an activity shared with other MPs as similar to MP<sup>TMV</sup> also the expression  
386 of MP<sup>ORMV</sup> or MP<sup>TVCV</sup> reduced the intensity of PD callose induction by poly(I:C) as compared to the  
387 control (absence of the respective MP) (**Figure 8**). These observations suggest a new paradigm for  
388 virus movement whereby dsRNA produced by TMV replication in a newly infected cell at the  
389 infection front triggers a host PTI response that targets PD for callose deposition and closure in order  
390 to restrict the spreading of the virus. To allow the spread of replicated viral genomes into non-infected  
391 cells, the viral MP acts as an effector to transiently suppress this dsRNA-induced response (**Figure**  
392 **10, A and B**). Upon enhancement of the PTI response by external treatment of infected plants with  
393 poly(I:C) the virus-encoded MP may become insufficient for efficient suppression, thus leading to the  
394 inhibition of virus movement (**Figure 1, A and B**).

395

396 The MP is expressed in cells at and also closely behind the infection front (**Figure 6, A to C**). The  
397 restriction of MP activity and of low callose levels in cells at the infection front indicates that the  
398 protein exists in different activity states. Consistently, several studies correlated the activity of MP  
399 with its phosphorylation state (Lee and Lucas, 2001). The partial, rather than full, suppression of  
400 dsRNA-induced callose deposition by ectopically expressed MP may reflect the different activity  
401 states of MP expressed under such conditions.

402

403 The mechanism by which MP suppresses the dsRNA-induced callose deposition at PD remains to be  
404 studied. dsRNA sequestration by MP is precluded as MP has no dsRNA binding activity (Citovsky et  
405 al., 1990). Electron micrographs indicated that the TMV MP forms fibrillar substructures within PD  
406 cavities (Ding et al., 1992; Moore et al., 1992; Heinlein et al., 1998) but it is unknown whether these  
407 structures are functional. Several studies support the hypothesis that a callose-degrading beta-1,3-  
408 glucanase enzyme activity may regulate virus movement (Iglesias and Meins, 2000; Bucher et al.,  
409 2001; Levy et al., 2007), but strong evidence indicating that viruses like TMV indeed operate such  
410 activities for virus movement is lacking. More recent observations suggest that the MPs of different  
411 viruses interact with the synaptotagmin SYTA for movement (Uchiyama et al., 2014; Levy et al.,  
412 2015; Yuan et al., 2018). Synaptotagmins (SYTs) and other Ca<sup>2+</sup>-sensitive C2 domain-containing  
413 proteins, such as the multiple C2 domains and transmembrane region proteins (MCTPs) are proposed

414 to function as membrane-tethering proteins at membrane contact sites (Tilsner et al., 2016; Brault et  
415 al., 2019). Notably, the strand of endoplasmic reticulum (desmotubule) that traverses the PD channel  
416 between cells is tethered to the adjacent plasma membrane (PM) by MCTPs and SYTs (Brault et al.,  
417 2019; Ishikawa et al., 2020). Therefore, it is conceivable that MPs target SYTA to reach PD or even  
418 to modify a membrane tethering activity of SYTA within PD in order to alter the cytoplasmic space  
419 between the tethered membranes available for macromolecular transport (Pitzalis and Heinlein, 2017).  
420 However, while further studies are needed to explore this idea, the results shown here promote the  
421 model that the MPs of TMV and also the MPs of ORMV and TVCV facilitate movement by  
422 interacting with components of the dsRNA-induced signaling and callose synthesis and turnover  
423 pathways to inhibit callose deposition at PD. The MPs may interfere with these pathways in the  
424 cytoplasm (**Figure 10A and B**) or at PD. However, earlier studies indicated that the MPs of TMV,  
425 TVCV and cauliflower mosaic virus have the capacity to interact with the cell wall protein pectin-  
426 methylesterase (PME) which may allow transport of MP through the secretory pathway (Chen et al.,  
427 2000). It is conceivable, therefore, that MPs are partially secreted to inhibit the activity of the dsRNA  
428 perceiving receptors at the PM. However, whether the MPs of TMV, ORMV and TVCV inhibit PD  
429 callose deposition through interaction with PTI signaling components or rather through direct  
430 interactions with callose synthesizing or degrading enzymes at PD remains to be investigated. As the  
431 MP of TMV suppressed PD callose deposition triggered by either poly(I:C) and flg22, the signaling  
432 components, enzymes, or mechanisms affected by MP likely play a role in both poly(I:C)- and flg22-  
433 triggered pathways.

434

#### 435 **dsRNA induces antiviral defense through a novel PTI signaling pathway**

436 We have shown here that the dsRNA-induced signaling pathway leading to callose deposition at PD  
437 involves SERK1, BIK1/PBL1, CML41, Ca<sup>2+</sup>, and potentially PDL1/2/3, but neither strong MPK  
438 activation or ROS production nor the presence of the major ROS-producing enzymes (RBOHD and  
439 RBOHF). Thus, although MPK activation and ROS production are hallmarks of PTI (DeFalco and  
440 Zipfel, 2021) and ROS signaling plays a role in PD regulation (Cheval and Faulkner, 2018), dsRNA  
441 activates its own specific pathway to regulate PD. Moreover, the lack of ROS production clearly  
442 distinguishes virus/dsRNA-induced signaling from the ROS-associated responses induced by other  
443 pathogens. Importantly, we found that poly(I:C) treatment triggers BIK1 phosphorylation and that the  
444 level of poly(I:C)-induced BIK1 phosphorylation depends on SERK1, thus potentially suggesting the  
445 existence of dsRNA-perceiving SERK1-containing receptor complex that signals to BIK1.  
446 Alternatively, dsRNA may induce yet non-identified signaling molecules that are signaled through  
447 SERK1 and BIK1. The PD-localized CML41 protein was previously shown to participate in flg22-  
448 triggered, but not chitin-triggered PD callose deposition (Xu et al., 2017). Thus, although differing in  
449 upstream components, dsRNA-induced signaling may target PD-associated regulatory components  
450 also regulated by flg22. The absence of ROS signaling in dsRNA-induced PD regulation could reflect

451 this specific elicitor type or a specific location of perception. Bacterial and fungal PAMPs are released  
452 in the apoplast and perceived by PRRs at the PM, while viral dsRNA formation and perception may  
453 occur at intracellular membranes where viruses replicate. RIG-I-like receptors (RLRs) including RIG-  
454 I, MDA5 and LGP2 detect the presence of dsRNA in animals (Tan et al., 2018) and provide examples  
455 of dsRNA perception in the cytoplasm. Viral RNAs in animals are also recognized by Toll-like  
456 receptors in endosomes following internalization by dendritic cells and macrophages. In analogy, it is  
457 known that bacterial PAMP receptor complexes in plants are internalized from the PM to endosomes  
458 and that plant receptor-complexes can signal from endosomes. Recognition of viral dsRNA may  
459 therefore occur during membrane fusion events between viral RNA-containing vesicles or membrane-  
460 associated viral replication complexes (VRCs) (Niehl and Heinlein, 2019). Alternatively, the  
461 cytoplasmic dsRNA may be exported into the apoplast to be sensed by the PM-resident PRRs. A  
462 precedent for the transport of functional RNA molecules across plant membranes is provided by  
463 cross-kingdom RNAi (Huang et al., 2019). For example, dsRNAs sprayed onto plants were shown to  
464 inhibit fungal growth in tissues distant from the sprayed tissues by inducing RNAi against essential  
465 fungal genes thus suggesting that applied dsRNAs are taken up by plants and that either dsRNAs or  
466 derived small RNAs processed within cells are able to reach the fungus in distant tissues (Koch et al.,  
467 2016). Moreover, emerging evidence suggest the presence of viral particles, viral proteins, and viral  
468 RNA in the apoplast of infected plants (Mohaved et al., 2019; Hu et al., 2021; Wan et al., 2015; Wan  
469 and Laliberté, 2015). Moreover, extracellular vesicles that are secreted from plants cells and are  
470 present in apoplastic fluid contain various RNA species, including viral RNA (Cai et al., 2018; Cai et  
471 al., 2021; Ruf et al., 2022). Poly (I:C) used in this study mimics these potential pathways by  
472 apparently being able to enter plant cells upon treatment (**Figure 9**), which is consistent with dsRNA  
473 perception in the cytoplasm, or be sensed in the apoplasm, either upon secretion or before cell entry  
474 (**Figure 10A and B**). Plant viruses like TMV and ORMV undergo early replication stages at punctate,  
475 cortical microtubule-associated ER sites in close vicinity of the PM (potentially ER:PM contact sites  
476 (Pitzalis and Heinlein, 2017; Huang and Heinlein, 2022)), which may facilitate dsRNA perception  
477 through membrane fusion events or dsRNA secretion from the VRCs and activation of PM-localized  
478 signaling proteins in the apoplasm (Niehl and Heinlein, 2019). DRB2 and other double-stranded RNA  
479 binding proteins (DRBs) were recently shown to accumulate in VRCs and to play a role in virus  
480 accumulation (Incarbone et al., 2021) or virus-induced necrosis (Fatyol et al., 2020) and could have an  
481 important function in dsRNA sensing. Importantly, dsRNA-induced innate immunity is unaffected by  
482 mutations in dsRNA binding DICER-LIKE (DCL) proteins, which excludes these proteins as the  
483 dsRNA receptors for PTI and also shows that dsRNA silencing and dsRNA-induced innate immunity  
484 require different protein machinery (Niehl et al., 2016). The two different antiviral defense responses  
485 are also spatially separated. Inactivating the TMV VSR causes virus silencing but has no effect on  
486 virus movement and causes potent antiviral silencing only in cells behind the front engaged in virus  
487 replication for the production of virus progeny (Kubota et al., 2003; Vogler et al., 2007). Thus, we

488 propose a model whereby a virus requires MP as viral virulence effector in cells at the infection front  
489 to suppress dsRNA-triggered PTI to support virus movement whereas a VSR is required as virulence  
490 effector in cells behind the front to suppress dsRNA-induced silencing for producing viral progeny  
491 (**Figure 10C**).

492 It will be interesting to dissect how the SERK1-BIK1/PBL1 module signals to CML41 and  
493 PDLP1/2/3 to regulate PD callose deposition. It is possible that BIK1/PBL1 may interact with and  
494 phosphorylate directly PDLPs in mediating callose deposition at the PD. It has been shown that the  
495 plasma membrane-tethered BIK1 regulates PAMP-triggered calcium signals by directly  
496 phosphorylating cyclic nucleotide-gated channel 2 and 4 (CNGC2/4), whose activities can be  
497 regulated by CAM7 (Tian et al., 2019). Additionally, BIK1 also phosphorylates calcium-permeable  
498 channel, hyperOsmolality-induced  $[Ca^{2+}]$  increase 1.3 (OSCA1.3) in regulating stomatal immunity  
499 (Thor et al., 2020). Our observation that the calcium-chelating EGTA inhibits dsRNA-induced PD  
500 callose deposition supports the involvement of the calcium binding protein CML41 and calcium  
501 signaling in PD regulation. Therefore, it will be interesting to determine if any calcium channels  
502 directly regulated by BIK1/PBL1 and modulated by CML41 may be involved in mediating calcium  
503 signaling in plant antiviral immunity. This will help to delineate a genetic and biochemical signaling  
504 pathway linking SERKs-RLCKs-calcium channels/CML41-PDLP1/2/3 to calcium signals in  
505 regulating PD and plant antiviral immunity. It will also be interesting to determine the role of other  
506 SERKs in virus sensing and immunity. It has been shown that SERK3/BAK1 plays a role in antiviral  
507 defense (Kørner et al., 2013) but the molecular mechanism remains to be explored. While poly(I:C)-  
508 induced ethylene production was not affected in *serk3/bak1* mutants (Niehl et al., 2016), it remains to  
509 be tested if SERK3/BAK1 or also SERK2 or SERK4 could play a role in dsRNA sensing leading to  
510 PD callose deposition, thus potentially explaining cases of *serk1*-independent dsRNA-induced gene  
511 activation (**Figure 2A**) as well as the residual poly(I:C)-induced activation of PD callose deposition in  
512 *serk1* mutants (**Figure 3E**).

513 In conclusion, we found that as a plant defense mechanism, dsRNA-induced antiviral PTI targets  
514 PD for callose deposition through some shared typical PTI signaling components with distinct  
515 features. To counteract this and launch efficient infections, viral MPs could effectively suppress  
516 dsRNA-induced callose deposition at PD, thus leading to a new concept of plant-virus interaction  
517 arm-race. This study calls upon the identification of the PTI dsRNA receptor, the mechanisms of  
518 SERK1-BIK1-calcium channels/CML41-PDLP1/2/3 signaling and PTI suppression by MP, and how  
519 dsRNA-induced PTI and RNA silencing are controlled during the spread of infection, all of which  
520 present exciting new challenges for additional studies.

521

522

523 **Methods**

524

525 Plant materials and growth conditions

526 *N. benthamiana* and *A. thaliana* plants were grown from seeds in soil. *N. benthamiana* were kept  
527 under 16h/8h light/dark periods at +22 °C/+18 °C in a greenhouse equipped with Philips SON-T 400  
528 W HPS Lamps (200-250  $\mu\text{mol}/\text{m}^2/\text{s}$ ). *A. thaliana* plants were kept under 12h/12h light/dark periods at  
529 +21°C/+18 °C in a growth chamber equipped with LED lights (160-175  $\mu\text{mol}/\text{m}^2/\text{s}$ ). MP:RFP-  
530 transgenic *N. benthamiana* plants were produced by leaf disk transformation (Horsch et al., 1985)  
531 using binary plasmid pK7-MP:RFP (Boutant et al., 2010). The plasmid was constructed by inserting  
532 the MP coding sequence of TMV into pK7RWG2 using Gateway procedures. *N. benthamiana* plants  
533 expressing GFP fused *Flock house virus* B2 protein have been described previously (Monsion et al.,  
534 2018) and were provided by Christophe Ritzenthaler (IBMP, CNRS, Strasbourg, France). The  
535 Arabidopsis mutants used in this study have been described previously and homozygous seeds were  
536 kind provided from different research laboratories. Seeds of the *bik1 pbl1* double mutant  
537 (SALK\_005291 SAIL\_1236\_D07) (Zhang et al., 2010) were provided by Cyril Zipfel (University of  
538 Zürich, Switzerland). *mpk3-1* (SALK\_151594) and *mpk6-2* (SALK\_073907) lines were given by  
539 Kenichi Tsuda (Max Planck Institute for Plant Breeding research, Cologne, Germany) and, together  
540 with seeds of the *mpk3amiRmpk6* (Li et al., 2014) and *serk1-1* (SALK\_044330) (Meng et al., 2015b)  
541 mutants, also by the author Libo Shan. Seeds for *rbohD* and *rbohF* mutants (Torres et al., 2002) were  
542 provided by Christine Faulkner (John Innes Centre, Norwich) and seeds of *CML41* overexpressing  
543 and silenced lines (*CML41-OEX-2*, *CML41-OEX-12*, *CML41-amiRNA-1* and *CML41-amiRNA-4*) (Xu  
544 et al., 2017) were a gift of Matthew Gilliham (University of Adelaide, Australia). Arabidopsis lines  
545 transgenic for PD markers mCherry-BDCB1 (Simpson et al., 2009; Benitez-Alfonso et al., 2013) or  
546 PdBG2-citrine (Benitez-Alfonso et al., 2013) were provided by Yoselin Benitez-Alfonso (University  
547 of Leeds, UK).

548

549 Virus inoculation

550 cDNA constructs for TMV-MP:RFP (Ashby et al., 2006), TMV-GFP (Heinlein et al., 1995), and  
551 TMV $\Delta$ M-GFP (Vogler et al., 2008) have been described previously. *N. benthamiana* plants were  
552 mechanically inoculated in the presence of an abrasive (Celite®545) with infectious RNA *in vitro*-  
553 transcribed from these constructs. A TMV replicon (TMV- $\Delta$ MP- $\Delta$ CP-GFP) cloned in a binary vector  
554 for agroinfiltration and used for testing virus replication and movement trans-complementation has  
555 been described (Borniego et al., 2016). Arabidopsis plants were inoculated with purified ORMV  
556 virions (Niehl et al., 2012).

557

558 Analysis of virus infection in the presence of elicitors

559 To test the effect of elicitors on TMV-GFP infection in *N. benthamiana*, plants were inoculated with  
560 200  $\mu\text{l}$  inoculum containing 20  $\mu\text{l}$  of infectious viral RNA transcription mix and 0.5  $\mu\text{g}/\mu\text{l}$  (equals  $\sim$ 1  
561  $\mu\text{M}$ ) poly(I:C) (Sigma-Aldrich, USA), or 1  $\mu\text{M}$  flg22 (EZBiolabs, USA or Proteogenix, France), or



562 water. Infection sites on the inoculated leaves were imaged using a hand-held camera and UV lamp  
563 (BLAK RAY B-100AP; UVP Inc., Upland, California) in the presence of a ruler for size  
564 normalization. The areas of infection sites in each leaf were measured with Image J software upon  
565 selection of infection site as regions of interest using fluorescence thresholding and the wand tracing  
566 tool, and by setting the scale according to the ruler. For testing the effect of poly(I:C) on viral  
567 replication, *N. benthamiana* leaves were agro-inoculated with a MP-deficient, cell-autonomous TMV  
568 replicon (TMV $\Delta$ M- $\Delta$ C-GFP) (Borniego et al., 2016). After 1 day, the fluorescent leaf patches were  
569 gently rubbed with 200  $\mu$ l of 0.5  $\mu$ g/ $\mu$ l poly(I:C) in the presence of celite. At 1, 3 and 5 days after this  
570 treatment, the GFP-expressing leaf patches were analysed for viral RNA accumulation by quantitative  
571 Taqman RT-qPCR using previously described methods (Mansilla et al., 2009; Niehl et al., 2016).  
572 To test the effect of elicitors on ORMV infection in Arabidopsis, 4  $\mu$ l of elicitor solution (10  $\mu$ g/ml  
573 poly(I:C) or 10  $\mu$ M flg22) or 4  $\mu$ l PBS were placed on rosette leaves of 3 weeks old Arabidopsis  
574 wildtype or mutant Col-0 plants. A volume of 2.5  $\mu$ l of a 20 ng/ $\mu$ l solution of purified ORMV virions  
575 was placed on the same leaves. Subsequently, the leaves were gently rubbed in the presence of celite  
576 as abrasive. Immediately after treatment, remaining elicitors, buffers and virions were washed off the  
577 leaf surface. Symptoms were analysed at 28 dpi. At the same time young, systemic leaves were  
578 sampled for analysis of virus accumulation by quantitative Taqman RT-qPCR using previously  
579 described methods (Mansilla et al., 2009; Niehl et al., 2016).

580

#### 581 Analysis of differential gene expression by RT-qPCR

582 *N. Benthamiana* or Arabidopsis Col-0 leaf discs were excised with a cork borer and incubated  
583 overnight in 12-well plates containing 600  $\mu$ l deionized, ultra-pure water. The leaf disks were washed  
584 several times with water and then incubated with elicitor (1  $\mu$ M flg22, 0.5  $\mu$ g/ $\mu$ l poly(I:C), or water as  
585 control) for 3 hours. After washing the discs with deionized, ultra-pure water three times, samples  
586 were ground to a fine powder in liquid nitrogen and total RNA was extracted by TRIzol<sup>TM</sup> reagent  
587 according to the protocol of the manufacturer. 2  $\mu$ g of RNA were reverse transcribed using a reverse  
588 transcription kit (GoScript<sup>TM</sup> Reverse Transcription System, Promega). The abundance of specific  
589 transcript was measured by probing 1  $\mu$ L cDNA by quantitative real-time PCR in a total volume of 10  
590  $\mu$ l containing 5  $\mu$ L SYBR-green master mix (Roche), 0.5  $\mu$ M forward and reverse primer and water.  
591 qPCR was performed in a Lightcycler480 (Roche) using a temperature regime consisting of 5 minutes  
592 at 95°C followed by 45 cycles at 95°C for 10 seconds, 60°C for 15 seconds, and 72°C for 15 seconds,  
593 and ending with a cycle of 95°C for 5 seconds, 55°C for 60 seconds, 95°C for continuous time until  
594 final cooling to 40°C for 30 seconds. The threshold cycle (CT) values were normalized to CT-values  
595 obtained for reference genes ACTIN 2 and UBIQUITIN 10 (Czechowski et al., 2005), providing  $\Delta$ CT  
596 values. These were used to calculate the  $2^{-\Delta\text{CT}}$  values representing relative expression levels, the mean  
597 values and standard errors (SE). Each mean value represents the analysis of three independent



598 replicate samples (individual plants treated the same way and harvested at the same time), each  
599 measured by three technical replicates. Primers are listed in Table S1.

600

#### 601 Transient expression of proteins by agroinfiltration

602 Binary plasmids for transient expression of RFP and of TMV-derived MP:RFP, MP:GFP,  
603 MP<sup>C55</sup>:GFP, and MP<sup>P81S</sup>:GFP as well as of MP<sup>ORMV</sup>:RFP and MP<sup>TVCV</sup>:RFP were created by Gateway  
604 cloning as has been described previously (Brandner et al., 2008; Sambade et al., 2008; Boutant et al.,  
605 2010).

606 For transient expression of the fluorescent fusion proteins, cultures of *A. tumefaciens* bacteria (strain  
607 GV3101) carrying these plasmids were harvested by centrifugation, resuspended in infiltration  
608 medium (10 mM MES, 10 mM MgCl<sub>2</sub>, 200 μM acetosyringone; pH 5.5) to a final optical density at  
609 600 nm (OD<sub>600</sub>) of 0.1 (unless stated differently), and infiltrated into the abaxial side of the leaf using  
610 a syringe without a needle. Leaves were observed by confocal microscopy at 48 hours after  
611 agroinfiltration.

612 For GFP mobility assays, we used *Agrobacteria* that were co-transformed with binary vectors for  
613 expression of GFP together with the cell-autonomous nuclear protein NLS:RFP (pB7-  
614 NLS:M2CP:RFP; this vector was created by recombining pZeo-NLS:MS2CP (Sambade et al., 2008)  
615 with expression vector pH7RWG2). The two binary vectors carry different resistance genes and their  
616 presence in the same *agrobacteria* was maintained by appropriate antibiotic co-selection. Before  
617 infiltration, the diluted culture (OD<sub>600</sub> = 0.1) was further diluted 1:1000 or 1:10000 to ensure  
618 expression of both proteins in only few cells of the leaf. 24 hours after infiltration, the agroinfiltrated  
619 leaves were detached and analyzed by confocal microscopy, revealing about 10-15 single cell  
620 transformation events with both markers. The levels of cytoplasmic GFP and nuclear NLS:RFP  
621 differed between the transformed cells but cells expressing only GFP or only NLS:GFP were not  
622 observed, which excludes the occurrence of transformation events in which only one of the T-DNAs  
623 was transferred. Subsequently, leaf disks with the single cell transformation events were excised and  
624 incubated in 0.5 μg/μl poly(I:C) or water for 48 hours. Finally, each of the transformation events was  
625 evaluated for GFP movement by confocal microscopy by counting the radial cell layers into which  
626 GFP has moved away from the infiltrated cell (marked by red fluorescent nucleus).

627 For movement trans-complementation assays, *N. benthamiana* leaves were infiltrated with  
628 *Agrobacterium* cultures (OD<sub>600 nm</sub> = 0.3) for the expression of either MP<sup>TMV</sup>:mRFP MP<sup>ORMV</sup>:mRFP,  
629 MP<sup>TVCV</sup>:mRFP or of free mRFP together with a highly diluted *Agrobacterium* culture for infection of  
630 single cells with TMVΔMPΔCP-GFP (OD<sub>600 nm</sub> = 1 x 10<sup>-5</sup>). Fluorescent infection sites indicating  
631 complementation of the MP-deficient virus were imaged with a Nikon D80 camera at 5 dpi under  
632 UV illumination. For the movement trans-complementation assay with MP:RFP-transgenic *N.*  
633 *benthamiana* plants, leaves were inoculated with infectious RNA *in vitro*-transcribed from pTMVΔM-  
634 GFP (Vogler et al., 2008) and infection sites were observed at 7 dpi.

635

### 636 Callose staining

637 Leaf disks were excised with a cork borer and placed into wells of 12-well culture plates containing 1  
638 ml water and incubated overnight under conditions at which the plants were raised. The leaf discs  
639 were washed several times with water before use. For callose staining, individual leaf disks were  
640 placed on microscope slides and covered with a coverslip fixed with tape. If not otherwise stated, 200  
641  $\mu$ l of a 1% aniline blue solution (in 50 mM potassium phosphate buffer, pH 8.0) containing either 0.5  
642  $\mu$ g/ $\mu$ l poly(I:C), 50 ng/ $\mu$ l dsRNA<sup>ph16</sup> or 1  $\mu$ M flg22 were soaked into the space between the glass slide  
643 and coverslip. The glass slide with the sample was evacuated for 1-2 minutes (< 0.8 pa) in a vacuum  
644 desiccator followed by slow release of the pressure. Aniline blue fluorescence was imaged 30 minutes  
645 after dsRNA or control treatment using a Zeiss LSM 780 confocal laser scanning microscope with  
646 ZEN 2.3 software (Carl Zeiss, Jena, Germany) and using a 405 nm diode laser for excitation and  
647 filtering the emission at 475-525 nm. 8-bit Images acquired with a 40 $\times$  1.3 N.A. Plan Neofluar  
648 objective with oil immersion were analyzed with ImageJ software (<http://rsbweb.nih.gov/ij/>) using  
649 the plug-in *calloseQuant*, which after setting few parameters localizes fluorescent callose spots and  
650 quantifies callose fluorescence intensity of each spot automatically (Huang et al., 2022). This plugin is  
651 available at <https://raw.githubusercontent.com/mutterer/callose/main/calloseQuant.ijm>. Callose spots  
652 were measured in 1-3 images taken from each leaf disk. If not otherwise mentioned, three leaf discs  
653 from three different plants were evaluated for each genotype or condition. To control for normal  
654 poly(I:C) treatment and callose staining conditions, samples of Arabidopsis mutants were always  
655 analyzed in parallel to samples from the Col-0 wild-type. Similarly, samples from agroinfiltrated  
656 MP:GFP/RFP-expressing *N. benthamiana* leaves were compared with samples from agroinfiltrated  
657 GFP/RFP-expressing control leaves. The distribution of pooled fluorescence intensities obtained for  
658 the specific genotype or treatment condition is shown in boxplots or column diagrams. Regions of  
659 interest (ROIs) selected by *calloseQuant* were verified visually before measurement. ROIs that were  
660 not at the plant cell walls or showed no clear signal above the background signal were deleted.  
661 Moreover, individual fluorescence intensities that occurred as outliers from the general distribution of  
662 fluorescence intensities (<1%) in the sample were excluded from analysis.

663

### 664 Analysis of MPK activation

665 Leaf disks from 4-week-old *A. thaliana* or *N. benthamiana* plants were elicited with 1  $\mu$ M flg22 or 0.5  
666  $\mu$ g/ $\mu$ l (equals  $\sim$ 1  $\mu$ M) poly(I:C). As a control, leaf discs were treated with water or treated with PBS.  
667 Elicitor and control treatment was performed by addition of the elicitor or the controls to leaf disks  
668 acclimated overnight in ultrapure water. After addition of the elicitor, leaf disks were vacuum  
669 infiltrated for 10 min. Samples were taken after an additional 20 min of incubation. MPK  
670 phosphorylation was determined using protein extracts obtained from elicitor or control-treated leaf  
671 disks using immunoblots probed with antibodies against phosphor-p44/42 ERK (Cell Signaling

672 Technology, Beverly, MA, USA; Ozyme S4370S) and horseradish peroxidase (HRP)-labelled  
673 secondary antibodies for luminescence detection (SuperSignal™ West Femto Maximum Sensitivity  
674 Substrate, ThermoFisher, France).

675

#### 676 Analysis of ROS production

677 Leaf discs excised from 4-week-old *A. thaliana* or *N. benthamiana* plants were incubated overnight in  
678 96-well plates with 600 µL of deionized, ultra-pure water. The next day deionized, ultra-pure water  
679 was replaced with 100 µL reaction solution containing 50 µM luminol and 10 µg/mL horseradish  
680 peroxidase (Sigma, USA) together with or without 1 µM flg22 or 0.5 µg/µl poly(I:C). Luminescence  
681 was determined with a luminometer (BMG LABTECH, FLUOstar®Omega) at 1.5 minute intervals  
682 for a period of 40 minutes. Mean values obtained for 10 leaf discs per treatment were expressed as  
683 mean relative light units (RLU).

684

#### 685 Seedling growth inhibition assay

686 Seeds were surface-sterilized and grown vertically at 22°C under 12h/12h light/dark periods in square  
687 petri-dishes on half-strength Murashige and Skoog (MS) basal medium (pH 5.8) containing 0.5 g/L  
688 MES and 0.8% agar. 7 days old seedlings were transferred into liquid half-strength Murashige and  
689 Skoog (MS) medium with or without 500 ng/µl (equals ~1 µM) poly(I:C) or 1 µM flg22. The effect of  
690 treatment on seedling growth was documented on photographs 12 days after treatment and measured  
691 with a ruler.

692

#### 693 Protoplast transient expression and BIK1 mobility shift assays

694 Arabidopsis protoplasts (about 40,000 cells) isolated from wildtype Col-0 or *serk1-1* were transfected  
695 with HA-epitope-tagged BIK1 (pHBT-35S::BIK1-HA) or co-transfected with pHBT-35S::BIK1-HA  
696 and pHBT-35S::SERK1-FLAG. Protoplast isolation and the transient expression assay were done as  
697 described previously (He et al., 2007). Also the BIK1 and SERK1 constructs have already been  
698 described (Lu et al., 2010; Meng et al., 2015a). The transfected protoplasts were incubated at room  
699 temperature overnight. After stimulation with flg22 (1 µM) or poly(I:C) (0.5 µg/ul) for 20 minutes,  
700 the protoplasts were collected by centrifugation and lysed by vortexing in 100 µl co-IP buffer (150  
701 mM NaCl, 50 mM Tris-HCl, pH7.5, 5 mM EDTA, 0.5% Triton, 1 × protease inhibitor cocktail.  
702 Before use, 2.5 µl 0.4 M DTT, 2 µl 1 M NaF and 2 µl 1 M Na<sub>3</sub>VO<sub>3</sub> were added per 1 ml IP buffer). A  
703 final concentration of 1 µM K-252a inhibitor (Sigma-Aldrich, 05288) was added 1 hour before  
704 poly(I:C) (0.5 µg/ul) treatment. Lysed protoplasts were treated with calf intestinal phosphatase (CIP)  
705 (New England Biolabs) for 60 minutes at 37°C (1 unit per µg of total protein). BIK1 was detected in  
706 Western blots assays using HA-HRP antibody (Invitrogen, 26183-HRP) and its phosphorylation was  
707 quantified by calculating the ratio between the intensity of the shifted upper band of phosphorylated  
708 BIK1 (pBIK1) and the sum of the intensities of both shifted and non-shifted bands (pBIK1 + BIK1)

709 (no treatment set to 0.0). The BIK1 mobility shift assays have been described previously (Lu et al.,  
710 2010; Ma et al., 2020). SERK1-FLAG was detected in Western blot assays using monoclonal anti-  
711 FLAG (Sigma-Aldrich, F1804).

712

### 713 Imaging

714 Microscopical imaging was performed with a Zeiss LSM 780 confocal laser scanning microscope  
715 equipped with ZEN 2.3 software (Carl Zeiss, Jena, Germany). Excitation / emission wavelengths were  
716 405 nm/475-525 nm for aniline blue, 488 nm / 500-525 nm for GFP, and 561 nm/560-610 nm for  
717 RFP.

718

### 719 **Acknowledgements**

720 We acknowledge funding from the Agence National de la Recherche (Plant-KBBE2012 / ANR-13-  
721 KBBE-0005-01, ERA-NET SusCrop2 / ANR-21-SUSC-0003-01; ANR-PRC / ANR-21-CE20-0020-  
722 01) and the Chinese Scholarship Council (PhD fellowship for CH) to MH, and funding from the  
723 NIH (R35GM144275), NSF (IOS-2049642), and the Robert A. Welch Foundation (A-2122-  
724 20220331) to LS. We thank Cyril Zipfel, Christine Faulkner, Matthew Gilliam, Kenichi Tsuda,  
725 Christophe Ritzenthaler, and Yoselin Benitez-Alfonso for providing seeds of Arabidopsis mutants and  
726 transgenic lines. We also thank Minna Poranen (University of Helsinki, Finland) for providing Phi6  
727 dsRNA.

728

### 729 **Author Contributions**

730 Conceptualization: MH

731 Methodology: CH, JM, EB, YY, MR, ARS, LEG, LS, MH

732 Investigation: CH, ARS, LEG, YY, MR, MH

733 Visualization: CH, ARS, LEG, YY, LS, MH

734 Funding acquisition: LS, MH

735 Project administration: MH

736 Supervision: LS, MH

737 Writing - original draft: MH

738 Writing – review & editing: CH, ARS, JM, LS, MH

739

### 740 **Competing Interests**

741 Authors declare that they have no competing interests

742

### 743 **Data and materials availability**

744 All data are available in the main text or the supplementary materials.

745

746 **Supplementary Materials**

747 Table S1

748 Figure S1

749

750 **References**

751

752 Alexopoulou, L., Holt, A.C., Medzhitov, R., and Flavell, R.A. (2001). Recognition of double-stranded  
753 RNA and activation of NF-kappaB by Toll-like receptor 3. *Nature* 413, 732-738.

754 Amari, K., Boutant, E., Hofmann, C., Schmitt-Keichinger, C., Fernandez-Calvino, L., Didier, P.,  
755 Lerich, A., Mutterer, J., Thomas, C.L., Heinlein, M., Mély, Y., Maule, A.J., and Ritzenthaler, C.  
756 (2010). A family of plasmodesmal proteins with receptor-like properties for plant viral movement  
757 proteins. *PLoS Pathog* 6, e1001119.

758 Ashby, J., Boutant, E., Seemanpillai, M., Groner, A., Sambade, A., Ritzenthaler, C., and Heinlein, M.  
759 (2006). *Tobacco mosaic virus* movement protein functions as a structural microtubule-associated  
760 protein. *J Virol* 80, 8329-8344.

761 Beffa, R.S., Hofer, R.M., Thomas, M., and Meins, F., Jr. (1996). Decreased susceptibility to viral  
762 disease of [beta]-1,3-glucanase-deficient plants generated by antisense transformation. *Plant Cell* 8,  
763 1001-1011.

764 Benitez-Alfonso, Y., Faulkner, C., Pendle, A., Miyashima, S., Helariutta, Y., and Maule, A. (2013).  
765 Symplastic intercellular connectivity regulates lateral root patterning. *Dev Cell* 26, 136-147.

766 Borniego, M.B., Karlin, D., Pena, E.J., Robles Luna, G., and Garcia, M.L. (2016). Bioinformatic and  
767 mutational analysis of ophiovirus movement proteins, belonging to the 30K superfamily. *Virology*  
768 498, 172-180.

769 Boutant, E., Didier, P., Niehl, A., Mely, Y., Ritzenthaler, C., and Heinlein, M. (2010). Fluorescent  
770 protein recruitment assay for demonstration and analysis of in vivo protein interactions in plant cells  
771 and its application to *Tobacco mosaic virus* movement protein. *Plant J* 62, 171-177.

772 Boyko, V., van der Laak, J., Ferralli, J., Suslova, E., Kwon, M.-O., and Heinlein, M. (2000). Cellular  
773 targets of functional and dysfunctional mutants of *Tobacco mosaic virus* movement protein fused to  
774 GFP. *J. Virol.* 74, 11339-11346.

775 Boyko, V., Ashby, J.A., Suslova, E., Ferralli, J., Sterthaus, O., Deom, C.M., and Heinlein, M. (2002).  
776 Intramolecular complementing mutations in *tobacco mosaic virus* movement protein confirm a role  
777 for microtubule association in viral RNA transport. *J Virol* 76, 3974-3980.

778 Brandner, K., Sambade, A., Boutant, E., Didier, P., Mély, Y., Ritzenthaler, C., and Heinlein, M.  
779 (2008). *Tobacco mosaic virus* movement protein interacts with green fluorescent protein-tagged  
780 microtubule end-binding protein 1. *Plant Physiol* 147, 611-623.

781 Brault, M.L., Petit, J.D., Immel, F., Nicolas, W.J., Glavier, M., Brocard, L., Gaston, A., Fouche, M.,  
782 Hawkins, T.J., Crowet, J.M., Grison, M.S., Germain, V., Rocher, M., Kraner, M., Alva, V., Claverol,

- 783 S., Paterlini, A., Helariutta, Y., Deleu, M., Lins, L., Tilsner, J., and Bayer, E.M. (2019). Multiple C2  
784 domains and transmembrane region proteins (MCTPs) tether membranes at plasmodesmata. *EMBO*  
785 *Rep* 20, e47182.
- 786 Bucher, G.L., Tarina, C., Heinlein, M., Di Serio, F., Meins Jr., F., and Iglesias, V.A. (2001). Local  
787 expression of enzymatically active class 1 beta-1,3-glucanase enhances symptoms of TMV infection  
788 in tobacco. *Plant J.* 28, 361-369.
- 789 Cai, Q., Qiao, L., Wang, M., He, B., Lin, F.-M., Palmquist, J., Huang, S.-D. and Jin, H. (2018). Plants  
790 send small RNAs in extracellular vesicles to fungal pathogen to silence virulence genes. *Science* 360,  
791 1126.
- 792 Cai, Q., He, B., Wang, S., Fletcher, S., Niu, D., Mitter, N., Birch, P.R.J., Jin, H. (2021). Message in a  
793 bubble: shuttling small RNAs and proteins between cells and interacting organisms using extracellular  
794 vesicles. *Annu Rev Plant Biol* 72, 497-524.
- 795 Caillaud, M.C., Wirthmueller, L., Sklenar, J., Findlay, K., Piquerez, S.J., Jones, A.M., Robatzek, S.,  
796 Jones, J.D., and Faulkner, C. (2014). The plasmodesmal protein PDLP1 localises to haustoria-  
797 associated membranes during downy mildew infection and regulates callose deposition. *PLoS Pathog*  
798 10, e1004496.
- 799 Castro, B., Citterico, M., Kimura, S., Stevens, D.M., Wrzaczek, M., and Coaker, G. (2021). Stress-  
800 induced reactive oxygen species compartmentalization, perception and signalling. *Nat Plants* 7, 403-  
801 412.
- 802 Chen, M.H., Shen, J., Hind, G., Handa, A.K., and Citovsky, V. (2000). Interaction between the  
803 tobacco mosaic virus movement protein and host cell pectin methylesterases is required for viral cell-  
804 to-cell movement. *EMBO J* 19, 913-920.
- 805 Cheval, C., and Faulkner, C. (2018). Plasmodesmal regulation during plant-pathogen interactions.  
806 *New Phytol* 217, 62-67.
- 807 Cheval, C., Samwald, S., Johnston, M.G., de Keijzer, J., Breakspear, A., Liu, X., Bellandi, A.,  
808 Kadota, Y., Zipfel, C., and Faulkner, C. (2020). Chitin perception in plasmodesmata characterizes  
809 submembrane immune-signaling specificity in plants. *Proc Natl Acad Sci U S A* 117, 9621-9629.
- 810 Christensen, N., Tilsner, J., Bell, K., Hammann, P., Parton, R., Lacomme, C., and Oparka, K. (2009).  
811 The 5' cap of *Tobacco mosaic virus* (TMV) is required for virion attachment to the actin/endoplasmic  
812 reticulum network during early infection. *Traffic* 10, 536-551.
- 813 Citovsky, V. (1999). *Tobacco mosaic virus*: a pioneer of cell-to-cell movement. *Philos Trans R Soc*  
814 *Lond B Biol Sci* 354, 637-643.
- 815 Citovsky, V., Knorr, D., Schuster, G., and Zambryski, P. (1990). The P30 movement protein of  
816 *Tobacco mosaic virus* is a single-strand nucleic acid binding protein. *Cell* 60, 637-647.
- 817 Csorba, T., Kontra, L., and Burgyan, J. (2015). Viral silencing suppressors: Tools forged to fine-tune  
818 host-pathogen coexistence. *Virology* 479-480C, 85-103.



- 819 Czechowski, T., Stitt, M., Altmann, T., Udvardi, M.K., and Scheible, W.R. (2005). Genome-wide  
820 identification and testing of superior reference genes for transcript normalization in Arabidopsis. *Plant*  
821 *Physiol* 139, 5-17.
- 822 De Storme, N., and Geelen, D. (2014). Callose homeostasis at plasmodesmata: molecular regulators  
823 and developmental relevance. *Front Plant Sci* 5, 138.
- 824 DeFalco, T.A., and Zipfel, C. (2021). Molecular mechanisms of early plant pattern-triggered immune  
825 signaling. *Mol Cell* 81, 3449-3467.
- 826 Ding, B., Haudenschild, J.S., Hull, R.J., Wolf, S., Beachy, R.N., and Lucas, W.J. (1992). Secondary  
827 plasmodesmata are specific sites of localization of the *Tobacco mosaic virus* movement protein in  
828 transgenic tobacco plants. *Plant Cell* 4, 915-928.
- 829 Ding, S.W., and Voinnet, O. (2007). Antiviral immunity directed by small RNAs. *Cell* 130, 413-426.
- 830 Dolja, V.V., Krupovic, M., and Koonin, E.V. (2020). Deep roots and splendid boughs of the global  
831 plant virome. *Annu Rev Phytopathol* 58, 23-53.
- 832 Fatyol, K., Fekete, K.A., and Ludman, M. (2020). Double-stranded-RNA-binding protein 2  
833 participates in antiviral defense. *J Virol* 94, e00017-20.
- 834 Faulkner, C., Petutschnig, E., Benitez-Alfonso, Y., Beck, M., Robatzek, S., Lipka, V., and Maule, A.J.  
835 (2013). LYM2-dependent chitin perception limits molecular flux via plasmodesmata. *Proc Natl Acad*  
836 *Sci U S A* 110, 9166-9170.
- 837 Guenoune-Gelbart, D., Elbaum, M., Sagi, G., Levy, A., and Epel, B.L. (2008). *Tobacco mosaic virus*  
838 (TMV) replicase and movement protein function synergistically in facilitating TMV spread by lateral  
839 diffusion in the plasmodesmal desmotubule of *Nicotiana benthamiana*. *Mol Plant Microbe Interact*  
840 21, 335-345.
- 841 Guseman, J.M., Lee, J.S., Bogenschutz, N.L., Peterson, K.M., Virata, R.E., Xie, B., Kanaoka, M.M.,  
842 Hong, Z., and Torii, K.U. (2010). Dysregulation of cell-to-cell connectivity and stomatal patterning  
843 by loss-of-function mutation in Arabidopsis *chorus* (glucan synthase-like 8). *Development* 137, 1731-  
844 1741.
- 845 He, P., Shan, L., and Sheen, J. (2007). The use of protoplasts to study innate immune responses.  
846 *Methods Mol Biol* 354, 1-9.
- 847 Heinlein, M. (2015). Plant virus replication and movement. *Virology* 479-480, 657-671.
- 848 Heinlein, M., Epel, B.L., Padgett, H.S., and Beachy, R.N. (1995). Interaction of tobamovirus  
849 movement proteins with the plant cytoskeleton. *Science* 270, 1983-1985.
- 850 Heinlein, M., Wood, M.R., Thiel, T., and Beachy, R.N. (1998). Targeting and modification of  
851 prokaryotic cell-cell junctions by *Tobacco mosaic virus* cell-to-cell movement protein. *Plant J* 14,  
852 345-351.
- 853 Holdaway-Clarke, T.L., Walker, N.A., Hepler, P.K., and Overall, R.L. (2000). Physiological  
854 elevations in cytoplasmic free calcium by cold or ion injection result in transient closure of higher  
855 plant plasmodesmata. *Planta* 210, 329-335.

- 856 Horsch, A.B., Fry, J.E., Hoffmann, N.L., Eichholtz, D., Rogers, S.G., and Fraley, R.T. (1985). A  
857 simple and general method for transferring genes into plants. *Science* 227, 1229-1231.
- 858 Hu, S., Yin, Y., Chen, B., Lin, Q., Tian, Y., Song, X., Peng, J., Zheng, H., Rao, S., Wu, G., Mo, X.,  
859 Yan, F., Chen, J., and Lu, Y. (2021). Identification of viral particles in the apoplast of *Nicotiana*  
860 *benthamiana* leaves infected by potato virus X. *Mol Plant Pathol* 22, 456-464.
- 861 Huang, C., and Heinlein, M. (2022). Function of plasmodesmata in the interaction of plants with  
862 microbes and viruses. *Methods Mol Biol* 2457, 23-54.
- 863 Huang, C., Mutterer, J., and Heinlein, M. (2022). *In vivo* aniline blue staining and semi-automated  
864 quantification of callose deposition at plasmodesmata *Methods Mol Biol* 2457, 151-165.
- 865 Huang, C.Y., Wang, H., Hu, P., Hamby, R., and Jin, H. (2019) Small RNAs – Big players in plant-  
866 microbe interactions. *Cell Host Microbe* 26, 173-182.
- 867 Iglesias, V.A., and Meins, F., Jr. (2000). Movement of plant viruses is delayed in a  $\beta$ -1,3-glucanase-  
868 deficient mutant showing a reduced plasmodesmatal size exclusion limit and enhanced callose  
869 deposition. *Plant J.* 21, 157-166.
- 870 Incarbone, M., Clavel, M., Monsion, B., Kuhn, L., Scheer, H., Vantard, E., Poignavent, V., Dunoyer,  
871 P., Genschik, P., and Ritzenthaler, C. (2021). Immunocapture of dsRNA-bound proteins provides  
872 insight into *Tobacco rattle virus* replication complexes and reveals Arabidopsis DRB2 to be a wide-  
873 spectrum antiviral effector. *Plant Cell* 33, 3402-3420.
- 874 Ishikawa, K., Tamura, K., Fukao, Y., and Shimada, T. (2020). Structural and functional relationships  
875 between plasmodesmata and plant endoplasmic reticulum-plasma membrane contact sites consisting  
876 of three synaptotagmins. *New Phytol* 226, 798-808.
- 877 Jones, R.A.C. (2021). Global plant virus disease pandemics and epidemics. *Plants (Basel)* 10, 233.
- 878 Jones, R.A.C., and Naidu, R.A. (2019). Global dimensions of plant virus diseases: Current status and  
879 future perspectives. *Annu Rev Virol* 6, 387-409.
- 880 Kadota, Y., Sklenar, J., Derbyshire, P., Stransfeld, L., Asai, S., Ntoukakis, V., Jones, J.D., Shirasu, K.,  
881 Menke, F., Jones, A., and Zipfel, C. (2014). Direct regulation of the NADPH oxidase RBOHD by the  
882 PRR-associated kinase BIK1 during plant immunity. *Mol Cell* 54, 43-55.
- 883 Koch, A., Biedenkopf, D., Furch, A., Weber, L., Rossbach, O., Abdellatef, E., Linicus, L.,  
884 Johannsmeier, J., Jelonek, L., Goesmann, A., Cardoza, V., Mcmillan, J., Mentzel, T. and Kogel, K.-H.  
885 (2016). An RNAi-based control of *Fusarium graminearum* infections through spraying of long  
886 dsRNAs involves a plant passage and is controlled by the fungal silencing machinery. *PLoS Pathog*  
887 12, e1005901.
- 888 Kørner, C.J., Klauser, D., Niehl, A., Dominguez-Ferreras, A., Chinchilla, D., Boller, T., Heinlein, M.,  
889 and Hann, D.R. (2013). The immunity regulator BAK1 contributes to resistance against diverse RNA  
890 viruses. *Mol Plant Microbe Interact* 26, 1271-1280.
- 891 Kubota, K., Tsuda, S., Tamai, A., and Meshi, T. (2003). *Tomato mosaic virus* replication protein  
892 suppresses virus-targeted posttranscriptional gene silencing. *J Virol* 77, 11016-11026.

- 893 Lee, J.Y., and Lucas, W.J. (2001). Phosphorylation of viral movement proteins--regulation of cell-to-  
894 cell trafficking. *Trends Microbiol* 9, 5-8.
- 895 Lee, J.Y., Wang, X., Cui, W., Sager, R., Modla, S., Czymmek, K., Zybaliiov, B., van Wijk, K., Zhang,  
896 C., Lu, H., and Lakshmanan, V. (2011). A plasmodesmata-localized protein mediates crosstalk  
897 between cell-to-cell communication and innate immunity in Arabidopsis. *Plant Cell* 23, 3353-3373.
- 898 Levy, A., Zheng, J.Y., and Lazarowitz, S.G. (2015). Synaptotagmin SYTA forms ER-plasma  
899 membrane junctions that are recruited to plasmodesmata for plant virus movement. *Curr Biol* 25,  
900 2018-2025.
- 901 Levy, A., Erlanger, M., Rosenthal, M., and Epel, B.L. (2007). A plasmodesmata-associated beta-1,3-  
902 glucanase in Arabidopsis. *Plant J* 49, 669-682.
- 903 Li, F., Cheng, C., Cui, F., de Oliveira, M.V., Yu, X., Meng, X., Intorne, A.C., Babilonia, K., Li, M.,  
904 Li, B., Chen, S., Ma, X., Xiao, S., Zheng, Y., Fei, Z., Metz, R.P., Johnson, C.D., Koiwa, H., Sun, W.,  
905 Li, Z., de Souza Filho, G.A., Shan, L., and He, P. (2014). Modulation of RNA polymerase II  
906 phosphorylation downstream of pathogen perception orchestrates plant immunity. *Cell Host Microbe*  
907 16, 748-758.
- 908 Lim, G.H., Shine, M.B., de Lorenzo, L., Yu, K., Cui, W., Navarre, D., Hunt, A.G., Lee, J.Y.,  
909 Kachroo, A., and Kachroo, P. (2016). Plasmodesmata localizing proteins regulate transport and  
910 signaling during systemic acquired immunity in plants. *Cell Host Microbe* 19, 541-549.
- 911 Liu, Z., Wu, Y., Yang, F., Zhang, Y., Chen, S., Xie, Q., Tian, X., and Zhou, J.M. (2013). BIK1  
912 interacts with PEPRs to mediate ethylene-induced immunity. *Proc Natl Acad Sci U S A* 110, 6205-  
913 6210.
- 914 Lu, D., Wu, S., Gao, X., Zhang, Y., Shan, L., and He, P. (2010). A receptor-like cytoplasmic kinase,  
915 BIK1, associates with a flagellin receptor complex to initiate plant innate immunity. *Proc Natl Acad*  
916 *Sci U S A* 107, 496-501.
- 917 Ma, X., Claus, L.A.N., Leslie, M.E., Tao, K., Wu, Z., Liu, J., Yu, X., Li, B., Zhou, J., Savatin, D.V.,  
918 Peng, J., Tyler, B.M., Heese, A., Russinova, E., He, P., and Shan, L. (2020). Ligand-induced  
919 monoubiquitination of BIK1 regulates plant immunity. *Nature* 581, 199-203.
- 920 Mansilla, C., Sanchez, F., Padgett, H.S., Pogue, G.P., and Ponz, F. (2009). Chimeras between *Oilseed*  
921 *rape mosaic virus* and *Tobacco mosaic virus* highlight the relevant role of the tobamoviral RdRp as  
922 pathogenicity determinant in several hosts. *Mol Plant Pathol* 10, 59-68.
- 923 Meng, X., Shan, L., and He, P. (2015a). Stack heterotrimeric G proteins and MAPK cascades on a  
924 RACK. *Mol Plant* 8, 1691-1693.
- 925 Meng, X., Chen, X., Mang, H., Liu, C., Yu, X., Gao, X., Torii, K.U., He, P., and Shan, L. (2015b).  
926 Differential function of Arabidopsis SERK family receptor-like kinases in stomatal patterning. *Curr*  
927 *Biol* 25, 2361-2372.
- 928 Mittler, R. (2017). ROS are good. *Trends Plant Sci* 22, 11-19.

- 929 Movahed, N., Cabanillas, D.G., Wan, J., Vali, H., Laliberte, J.F., and Zheng, H. (2019). Turnip  
930 mosaic virus components are released into the extracellular space by vesicles in infected leaves. *Plant*  
931 *Physiol* 180, 1375-1388.
- 932
- 933 Monsion, B., Incarbone, M., Hleibieh, K., Poignavent, V., Ghannam, A., Dunoyer, P., Daeffler, L.,  
934 Tilsner, J., and Ritzenthaler, C. (2018). Efficient detection of long dsRNA *in vitro* and *in vivo* using  
935 the dsRNA binding domain from FHV B2 protein. *Front Plant Sci* 9, 70.
- 936 Moore, P.J., Fenczik, C.A., Deom, C.M., and Beachy, R.N. (1992). Developmental changes in  
937 plasmodesmata in transgenic tobacco expressing the movement protein of *Tobacco mosaic virus*.  
938 *Protoplasma* 170, 115-127.
- 939 Niehl, A., and Heinlein, M. (2019). Perception of double-stranded RNA in plant antiviral immunity.  
940 *Mole Plant Pathol* 20, 1203-1210.
- 941 Niehl, A., Wyrsh, I., Boller, T., and Heinlein, M. (2016). Double-stranded RNAs induce a pattern-  
942 triggered immune signaling pathway in plants. *New Phytol* 211, 1008-1019.
- 943 Niehl, A., Soininen, M., Poranen, M.M., and Heinlein, M. (2018). Synthetic biology approach for  
944 plant protection using dsRNA. *Plant Biotechnol J* 16, 1679-1687.
- 945 Niehl, A., Amari, K., Gereige, D., Brandner, K., Mély, Y., and Heinlein, M. (2012). Control of  
946 *Tobacco mosaic virus* movement protein fate by CELL-DIVISION-CYCLE protein 48 (CDC48).  
947 *Plant Physiol* 160, 2093-2108.
- 948 Nuhse, T.S., Bottrill, A.R., Jones, A.M., and Peck, S.C. (2007). Quantitative phosphoproteomic  
949 analysis of plasma membrane proteins reveals regulatory mechanisms of plant innate immune  
950 responses. *Plant J* 51, 931-940.
- 951 Oparka, K.J., Prior, D.A.M., Santa Cruz, S., Padgett, H.S., and Beachy, R.N. (1997). Gating of  
952 epidermal plasmodesmata is restricted to the leading edge of expanding infection sites of *Tobacco*  
953 *mosaic virus*. *Plant J.* 12, 781-789.
- 954 Pitzalis, N., and Heinlein, M. (2017). The roles of membranes and associated cytoskeleton in plant  
955 virus replication and cell-to-cell movement. *J Exp Bot* 69, 117-132.
- 956 Ruf, A., Oberkofler, L., Robatzek, S., and Weiberg, A. (2022). Spotlight on plant RNA-containing  
957 extracellular vesicles. *Curr Opin Plant Biol* 69, 102272.
- 958 Sambade, A., Brandner, K., Hofmann, C., Seemanpillai, M., Mutterer, J., and Heinlein, M. (2008).  
959 Transport of TMV movement protein particles associated with the targeting of RNA to  
960 plasmodesmata. *Traffic* 9, 2073-2088.
- 961 Simpson, C., Thomas, C., Findlay, K., Bayer, E., and Maule, A.J. (2009). An Arabidopsis GPI-anchor  
962 plasmodesmal neck protein with callose binding activity and potential to regulate cell-to-cell  
963 trafficking. *Plant Cell* 21, 581-594.
- 964 Tan, X., Sun, L., Chen, J., and Chen, Z.J. (2018). Detection of Microbial infections through innate  
965 immune sensing of nucleic acids. *Annu Rev Microbiol* 72, 447-478.

- 966 Thomas, C.L., Bayer, E.M., Ritzenthaler, C., Fernandez-Calvino, L., and Maule, A.J. (2008). Specific  
967 targeting of a plasmodesmal protein affecting cell-to-cell communication. *PLoS Biol* 6, e7.
- 968 Thor, K., Jiang, S., Michard, E., George, J., Scherzer, S., Huang, S., Dindas, J., Derbyshire, P., Leitao,  
969 N., DeFalco, T.A., Koster, P., Hunter, K., Kimura, S., Gronnier, J., Stransfeld, L., Kadota, Y.,  
970 Bucherl, C.A., Charpentier, M., Wrzaczek, M., MacLean, D., Oldroyd, G.E.D., Menke, F.L.H.,  
971 Roelfsema, M.R.G., Hedrich, R., Feijo, J., and Zipfel, C. (2020). The calcium-permeable channel  
972 OSCA1.3 regulates plant stomatal immunity. *Nature* 585, 569-573.
- 973 Tian, W., Hou, C., Ren, Z., Wang, C., Zhao, F., Dahlbeck, D., Hu, S., Zhang, L., Niu, Q., Li, L.,  
974 Staskawicz, B.J., and Luan, S. (2019). A calmodulin-gated calcium channel links pathogen patterns to  
975 plant immunity. *Nature* 572, 131-135.
- 976 Tilsner, J., Nicolas, W., Rosado, A., and Bayer, E.M. (2016). Staying tight: Plasmodesmal membrane  
977 contact sites and the control of cell-to-cell connectivity in plants. *Annu Rev Plant Biol* 67, 337-364.
- 978 Torres, M.A., Dangl, J.L., and Jones, J.D. (2002). Arabidopsis gp91phox homologues AtrbohD and  
979 AtrbohF are required for accumulation of reactive oxygen intermediates in the plant defense response.  
980 *Proc Natl Acad Sci U S A* 99, 517-522.
- 981 Tucker, E.B., and Boss, W.F. (1996). Mastoparan induced intracellular  $Ca^{2+}$  fluxes may regulate cell-  
982 to-cell communication in plants. *Plant Physiol.* 111, 459-467.
- 983 Uchiyama, A., Shimada-Beltran, H., Levy, A., Zheng, J.Y., Javia, P.A., and Lazarowitz, S.G. (2014).  
984 The Arabidopsis synaptotagmin SYTA regulates the cell-to-cell movement of diverse plant viruses.  
985 *Front Plant Sci* 5, 584.
- 986 Vatén, A., Dettmer, J., Wu, S., Stierhof, Y.D., Miyashima, S., Yadav, S.R., Roberts, C.J., Campilho,  
987 A., Bulone, V., Lichtenberger, R., Lehesranta, S., Mahonen, A.P., Kim, J.Y., Jokitalo, E., Sauer, N.,  
988 Scheres, B., Nakajima, K., Carlsbecker, A., Gallagher, K.L., and Helariutta, Y. (2011). Callose  
989 biosynthesis regulates symplastic trafficking during root development. *Dev Cell* 21, 1144-1155.
- 990 Vogler, H., Kwon, M.O., Dang, V., Sambade, A., Fasler, M., Ashby, J., and Heinlein, M. (2008).  
991 *Tobacco mosaic virus* movement protein enhances the spread of RNA silencing. *PLoS Pathog* 4,  
992 e1000038.
- 993 Vogler, H., Akbergenov, R., Shivaprasad, P.V., Dang, V., Fasler, M., Kwon, M.O., Zhanybekova, S.,  
994 Hohn, T., and Heinlein, M. (2007). Modification of small RNAs associated with suppression of RNA  
995 silencing by tobamovirus replicase protein. *J Virol* 81, 10379-10388.
- 996 Wan, J., Cabanillas, D.G., Zheng, H. and Laliberté, J.-F. (2015). Turnip mosaic virus moves  
997 systemically through both phloem and xylem as membrane-associated complexes. *Plant Physiol* 167,  
998 1374-1388.
- 999 Wan, J. and Laliberté, J.-F. (2015). Membrane-associated virus replication complexes locate to plant  
1000 conducting tubes. *Plant Signal Behav* 10, e1042639–e1042639.
- 1001 Wang, X., Sager, R., Cui, W., Zhang, C., Lu, H., and Lee, J.Y. (2013). Salicylic acid regulates  
1002 plasmodesmata closure during innate immune responses in Arabidopsis. *Plant Cell* 25, 2315-2329.

1003 Wu, S.W., Kumar, R., Iswanto, A.B.B., and Kim, J.Y. (2018). Callose balancing at plasmodesmata. *J*  
1004 *Exp Bot* 69, 5325-5339.  
1005 Xu, B., Cheval, C., Laohavisit, A., Hocking, B., Chiasson, D., Olsson, T.S.G., Shirasu, K., Faulkner,  
1006 C., and Gilliam, M. (2017). A calmodulin-like protein regulates plasmodesmal closure during  
1007 bacterial immune responses. *New Phytol* 215, 77-84.  
1008 Yuan, C., Lazarowitz, S.G., and Citovsky, V. (2018). The plasmodesmal localization signal of TMV  
1009 MP is recognized by plant synaptotagmin SYTA. *mBio* 9, e01314-18.  
1010 Zhang, J., Li, W., Xiang, T., Liu, Z., Laluk, K., Ding, X., Zou, Y., Gao, M., Zhang, X., Chen, S.,  
1011 Mengiste, T., Zhang, Y., and Zhou, J.M. (2010). Receptor-like cytoplasmic kinases integrate signaling  
1012 from multiple plant immune receptors and are targeted by a *Pseudomonas syringae* effector. *Cell Host*  
1013 *Microbe* 7, 290-301.

1014  
1015  
1016  
1017

## 1018 **Figure Legends**

1019  
1020 **Figure 1. Poly(I:C) treatment causes inhibition of virus movement in *N. benthamiana*.** (A) TMV-  
1021 GFP infection sites in *N. benthamiana* leaves at 7 days post inoculation (dpi) with the virus together  
1022 with either water (control), 0.5  $\mu\text{g}/\mu\text{l}$  ( $\approx 1 \mu\text{M}$ ) poly(I:C), or 1  $\mu\text{M}$  flg22. Scale bar, 1 cm. (B) Sizes of  
1023 individual infection sites measured in 10 leaf samples collected from three plants per treatment. Two-  
1024 tailed Mann-Whitney test; \*\*\*\*,  $p < 0.0001$ ; \*\*\*,  $p < 0.001$ ; \*\*,  $p < 0.01$ . The experiment was  
1025 performed three times with similar results. (C) TMV replication in *N. benthamiana* is not influenced  
1026 by poly(I:C). A cell-autonomous, MP-deficient TMV replicon (TMV $\Delta\text{M}\Delta\text{C}$ -GFP) expressed in cells  
1027 of agroinoculated leaves produces the same number of RNA genome copies in the presence and  
1028 absence of treatment with 0.5  $\mu\text{M}$  poly(I:C), as determined by Taqman RT-qPCR. Poly(I:C) and  
1029 control treatments were applied 1 day after agroinoculation and results obtained at indicated days after  
1030 this treatment (dpt) are shown. The data represent means of three biological replicates (with SD) per  
1031 time point and treatment. Two-tailed Mann-Whitney test. ns, not significant. (D) and (E) Treatment of  
1032 *N. benthamiana* with poly(I:C) or flg22 induces increased callose deposition at PD within 30 minutes  
1033 in a dose-specific manner. (D) Callose fluorescence at PD upon aniline blue staining. Scale bar, 10  
1034  $\mu\text{m}$ . (E) Relative callose content in individual PD (blue dots,  $n > 100$ ) as determined in three leaf  
1035 discs per treatment. Two-tailed Mann-Whitney test; \*\*\*\*,  $p = < 0.0001$ . (F) Callose deposition at PD  
1036 in *N. benthamiana* leaf epidermal tissue upon treatment with 50  $\text{ng}/\mu\text{l}$  biological dsRNA (dsRNA<sup>Phic6</sup>).  
1037 Relative callose content in individual PD (blue dots,  $n > 100$ ) as determined in three leaf discs per  
1038 treatment. Two-tailed Mann-Whitney test; \*\*\*\*,  $p = < 0.0001$ . (G-I) GFP mobility assay in *N.*  
1039 *benthamiana*. Leaf disks expressing GFP together with cell-autonomous NLS:RFP one day after



1040 agroinfiltration were treated with water or 0.5  $\mu\text{g}/\mu\text{l}$  poly(I:C) and imaged 48 hours later. (G)  
1041 Example of GFP movement from an epidermal cell marked by cell-autonomous NLS:RFP into  
1042 adjacent cells. Transiently expressed GFP shows a nucleocytoplasmic distribution (yellow arrow) and  
1043 its movement from the expressing epidermal cell (co-expressed NLS:RFP in the nucleus, in red) is  
1044 evident by appearance of green fluorescence in the nuclei and cytoplasm of adjacent cells (white  
1045 arrowheads). Cells into which GFP moved are indicated by the red dashed line in the merged image.  
1046 Scale bar, 50  $\mu\text{m}$ . (H and I) Quantification of GFP movement between epidermal cells in leaf disks  
1047 exposed to 0.5  $\mu\text{g}/\mu\text{l}$  poly(I:C) or water (control) (29 transformation events were analyzed for each  
1048 treatment). (H) Stacked column diagram showing the relative frequency of transformation events  
1049 associated with either no GFP movement (dark grey), GFP movement into one adjacent cell layer  
1050 (medium grey), or GFP movement into two adjacent cell layers (light grey). (I) Average intercellular  
1051 movement (total number of cell layers into which GFP has moved divided by the number of evaluated  
1052 transformation events). Two-tailed Mann-Whitney test; \*\*\*\*,  $p = <0.0001$ . A repetition of the GFP  
1053 mobility assay provided similar results. (J) Low level of MPK activation by poly(I:C) relative to flg22  
1054 after 30 minutes. Concentrations (conc.) are in  $\text{ng}/\mu\text{l}$  for poly(I:C) and in nM for flg22. The  
1055 experiment was performed three times with similar results. (K) Poly(I:C) induces innate immunity  
1056 marker genes, but suppresses expression of *BR11*, in *N. benthamiana*. Mean value and SD of gene  
1057 expression values obtained by RT-qPCR with three biological replicates (blue dots) harvested three  
1058 hours after treatment.

1059

1060 **Figure 2. Poly(I:C)-induced signaling in Arabidopsis depends on BIK1/PBL1.** (A) and (B)  
1061 Transcriptional regulation of Arabidopsis genes three hours after treatment with 0.5  $\mu\text{g}/\mu\text{l}$  poly(I:C).  
1062 For each gene, the mean value and the SD of gene expression values obtained by RT-qPCR analysis  
1063 of three biological replicates (blue dots) is shown. (A) Poly(I:C) induces innate immunity marker  
1064 genes in *A. thaliana* Col-0 wildtype. (B) Absence of poly(I:C)-induced *PR5* expression in the *serk1-1*  
1065 mutant. (C) Poly(I:C) treatment causes callose deposition at PD in *A. thaliana* Col-0. Images were  
1066 taken 30 minutes after treatment. Inlays show enlargements of the areas within the dashed boxes.  
1067 Scale bar, 20  $\mu\text{m}$ . Relative callose content in individual PD (blue dots,  $n > 100$ ) as determined in three  
1068 leaf discs from three plants per treatment. Two-tailed Mann-Whitney test; \*\*\*\*,  $p = <0.0001$ . (D)  
1069 Callose deposition at PD in *A. thaliana* Col-0 leaf epidermal tissue 30 minutes after treatment with 50  
1070  $\text{ng}/\mu\text{l}$  of biological dsRNA (dsRNA<sup>Phio6</sup>). Inlays show enlargements of the areas within the dashed  
1071 boxes. Scale bar, 20  $\mu\text{m}$ . Relative callose content in individual PD (blue dots,  $n > 100$ ) as determined  
1072 in three leaf discs per treatment. Two-tailed Mann-Whitney test; \*\*\*\*,  $p = <0.0001$ . (E) and (F)  
1073 Poly(I:C)-induced callose spots are localized to PD as shown by co-localization with PD markers  
1074 mCherry-PDCB1 (E) and PdBG2-citrine (F). Inlays show enlargements of the areas within the dashed  
1075 boxes. Scale bar, 10  $\mu\text{m}$ . (G) poly(I:C)-induced callose deposition at PD is inhibited in the *bik1 pbl1*  
1076 mutant Images were taken 30 minutes after treatment and the WT control of the same experiments is

1077 shown in (C). Inlays show enlargements of the areas within the dashed boxes. Scale bar, 20  $\mu\text{m}$ .  
1078 Relative callose content in individual PD (blue dots) as determined in three leaf discs per treatment.  
1079 Two-tailed Mann-Whitney test; ns, non-significant. (H) Poly(I:C)-induced MPK activation is reduced  
1080 in the *bik1 pbl1* mutant. Immunoblot detection of phosphorylated MPK. Samples were harvested 30  
1081 minutes after treatment with 0.5  $\mu\text{g}/\mu\text{l}$  poly(I:C), 1  $\mu\text{M}$  flg22, or water. “*bik1*” stands for *bik1 pbl1*.  
1082 CBB, Coomassie brilliant blue-stained gel showing staining of ribulose-bisphosphate-carboxylase  
1083 (Rubisco) as gel loading control. (I) *bik1 pbl1* plants do not show significant seedling root growth  
1084 inhibition in the presence of poly(I:C) as compared to WT Col-0 plants. Seedlings were kept for 12  
1085 days in 0.5  $\mu\text{g}/\mu\text{l}$  poly(I:C) or water. Scale bar, 1 cm. Quantification of poly(I:C)-induced root growth  
1086 inhibition in *A. thaliana* WT Col-0 and *bik1 pbl1* seedlings. Analysis of 6-7 seedlings (blue dots) per  
1087 condition. Two-tailed Mann-Whitney test; \*\*\*\*,  $p < 0.0001$ ; ns, non-significant.

1088

1089 **Figure 3. Poly(I:C) causes BIK1 phosphorylation and PD callose deposition in a SERK1-**  
1090 **dependent manner. (A) to (C)** Analysis of BIK1 phosphorylation in poly(I:C)-treated *A. thaliana*  
1091 Col-0 protoplasts. (A) Poly(I:C) treatment induces BIK1 phosphorylation as shown by a protein  
1092 mobility shift detected by Western blot analysis. Protoplasts expressing BIK1-HA were non-treated  
1093 (mock) or treated with 1  $\mu\text{M}$  flg22 or 0.5  $\mu\text{g}/\mu\text{l}$  poly(I:C), lysed after 20 minutes and treated or non-  
1094 treated with calf intestine phosphatase (CIP) for 60 before Western blot analysis using HA-HRP  
1095 antibody. BIK1 band intensities were quantified using Image Lab (Bio-Rad). Quantification of BIK1  
1096 phosphorylation (upper panel) calculated as ratio of intensity of the upper band (phosphorylated  
1097 BIK1, pBIK1) to the sum intensities of shifted and non-shifted bands (pBIK1 + BIK1) (no treatment  
1098 set to 0.0). CCB, Coomassie brilliant blue staining of Rubisco as gel loading control (lower panel).  
1099 (B) Poly(I:C)-induced BIK1 phosphorylation is blocked by 1  $\mu\text{M}$  of the kinase inhibitor K-252a  
1100 added 1 hour before poly(I:C) treatment. Rubisco detection by CBB staining is shown as gel loading  
1101 control (lower panel). Experimental conditions and quantification of BIK1 phosphorylation as in (A).  
1102 (C) SERK1 enhances poly(I:C)-induced BIK1 phosphorylation. Protoplasts from WT Col-0 or *serk1-*  
1103 *1* mutants were transfected with BIK1-HA together with or without SERK1-FLAG and followed by  
1104 treatment with or without 0.5  $\mu\text{g}/\mu\text{l}$  poly(I:C). Phosphorylated BIK1 band intensities were quantified  
1105 as in (A). The middle panel shows SERK1-FLAG expression. Rubisco detection by CBB staining is  
1106 shown as gel loading control (lower panel). (D) and (E) Poly(I:C)-induced PD callose deposition  
1107 depends on SERK1. (D) Callose fluorescence at PD seen upon aniline blue staining of epidermal cells  
1108 of WT Col-0 plants and *serk1-1* mutants treated with water (control) or 0.5  $\mu\text{g}/\mu\text{l}$  poly(I:C). Inlays  
1109 show enlargements of the areas within the dashed boxes. Scale bar, 10  $\mu\text{m}$ . (E) Relative callose  
1110 content (fluorescence intensity) in individual PD (blue dots,  $n > 100$ ) as determined in three leaf discs  
1111 taken from three plants per treatment. Two-tailed Mann-Whitney test; \*\*\*\*,  $p = < 0.0001$ . The  
1112 increase in PD callose levels in poly(I:C)-treated samples relative to water control-treated samples is  
1113 shown in percent (%). Although the callose intensity data distributions between poly(I:C)-treated and

1114 control-treated samples are significantly different in both WT Col-0 and *serk1*, the comparison of the  
1115 callose intensity median levels indicate a drastic inhibition of the poly(I:C)-induced PD callose  
1116 deposition response in *serk1* as compared to the WT.

1117

1118 **Figure 4. poly(I:C)-induced PD callose deposition is ROS- and MPK3/6 cascade-independent**

1119 **but requires PDLP1/2/3 and CML41.** (A) and (B) Unlike flg22, poly(I:C) treatment does not induce  
1120 any ROS production in Arabidopsis (A) or *N. benthamiana* (B). RLU, relative luminescence units.

1121 Mean values (black dots) and error bars (SD) obtained for each time point for 10 replicates (leaf  
1122 disks) per treatment. (C) Poly(I:C)-induced callose deposition at PD is not affected in *rbohD* or *rbohF*

1123 mutants. Relative callose content in individual PD (blue dots, n > 100) 30 minutes after treatment with  
1124 0.5 µg/µl poly(I:C) or water and determined in three leaf discs from three plants per treatment. Two-

1125 tailed Mann-Whitney test; \*\*\*\*, p = <0.0001. (D) Poly(I:C)-induced callose deposition at PD is not  
1126 affected in *mpk3* and *mpk6* single mutants, and neither in a *mpk3* mutant in which *MPK6* is silenced

1127 by an artificial miRNA (*mpk3 amiRmpk6*). Relative callose content in individual PD (blue dots, n >  
1128 100) 30 minutes after treatment with 0.5 µg/µl poly(I:C) or water and determined in three leaf discs

1129 from three plants per treatment. Two-tailed Mann-Whitney test; \*\*\*\*, p = <0.0001. (E) Poly(I:C)-  
1130 induced callose deposition at PD is independent of PDLP5 but depends on the redundantly acting

1131 PDLP1, PDLP2, and PDLP3. Relative callose content in individual PD (blue dots, n > 100) 30  
1132 minutes after treatment with 0.5 µg/µl poly(I:C) or water and determined in three leaf discs from three

1133 plants per treatment. Two-tailed Mann-Whitney test; \*\*\*\*, p = <0.0001; ns, non-significant. (F) and  
1134 (G) Poly(I:C)-induced callose deposition at PD depends on CML41. (F) PD callose deposition levels

1135 in poly(I:C)-treated and control-treated leaf disks of two *CML41*-overexpressing lines (OEX2 and  
1136 OEX12) and of two lines in which the expression of *CML41* is reduced by expression of artificial

1137 miRNA (amiRNA1 and amiRNA4). As compared to the WT (Col-0) and the *CML41*-overexpressing  
1138 lines, the inducibility of PD callose deposition by poly(I:C) is strongly decreased in the amiRNA

1139 lines. Relative callose content in individual PD (blue dots, n > 100) 30 minutes after treatment with  
1140 0.5 µg/µl poly(I:C) or water and determined in three leaf discs from three plants per treatment. Two-

1141 tailed Mann-Whitney test; \*\*\*\*, p = <0.0001. According to the Mann-Whitney test the distribution of  
1142 individual PD callose intensities is different between all control- and poly(I:C)-treated samples.

1143 However, unlike in WT Col-0 and *CML41*-overexpressing lines, the median PD callose intensity  
1144 levels are not increased upon poly(I:C)-treatment in amiRNA lines thus indicating a deficiency in the

1145 induction of PD callose deposition upon poly(I:C) treatment in these lines. (G) Relative levels of  
1146 *CML41* expression in plants of the OEX2, OEX12, amiRNA1 and amiRNA4 lines in comparison to

1147 WT (Col-0), as determined by RT-qPCR. Mean value and standard error of gene expression values  
1148 obtained by RT-qPCR with 3-6 biological replicates (blue dots). (H) poly(I:C)-induced callose

1149 deposition is reduced in the presence of EGTA. Relative callose content in individual PD (blue dots, n

1150 > 100) as determined in three leaf discs per treatment. Two-tailed Mann-Whitney test; \*\*\*\*, p =  
1151 <0.0001.

1152

1153 **Figure 5. BIK1/PBL1 and CML41 are required for antiviral defense (A) and (B) Disease**  
1154 **symptoms (A) and viral RNA accumulation (B) at 28 dpi in wild-type plants and mutants**  
1155 **inoculated with ORMV in the presence and absence of 0.5 µg/µl poly(I:C). Unlike in wild-**  
1156 **type plants (Col-0) the antiviral effect of poly(I:C) treatment is lost in *bik1 pbl1* mutants and**  
1157 ***CML41-amiRNA-1* expressing plants. Viral RNA accumulation (B) is depicted for 6**  
1158 **biological replicates per condition. Mean values and standard errors are shown. (C) and (D)**  
1159 **BIK1 and CML41 inhibit virus movement. (C) Representative symptom phenotypes at 21 dpi**  
1160 **of Arabidopsis Col-0 plants, *bik1 pbl1* mutant plants and plants transgenic for *CML41-***  
1161 ***amiRNA-1* that were locally inoculated with ORMV and from which the inoculated leaves**  
1162 **were removed at the indicated times in hours (h) and days (d). Whereas systemic leaves of**  
1163 **Col-0 plants show symptoms on plants that carried the inoculated leaves for 3 or more days**  
1164 **following inoculation, the systemic leaves of the *bik1 pbl1* mutant and of the CML41-**  
1165 **amiRNA-expressing plants show symptoms already if the inoculated leaves were present for**  
1166 **only 24 hours. (D) Immunoblot analysis of the youngest systemic leaves at 21 dpi using**  
1167 **antibodies against viral coat protein (CP) (Youcai mosaic virus antibody, AS-0527, DSMZ,**  
1168 **Braunschweig, Germany). The pattern of CP expression in the systemic leaves confirms that**  
1169 **in WT Col-0 plants the virus needs between 24 h and 3 d to exit the inoculated leaves and**  
1170 **move systemically, whereas the time needed for systemic movement is reduced to less than**  
1171 **24 h in the *bik1 pbl1* mutant and of the CML41-amiRNA expressing plants, thus indicating a**  
1172 **role of BIK1 and CML41 in restricting virus movement.**

1173

1174 **Figure 6. Viral MP expression correlates with a suppression of PD-associated callose levels. (A)**  
1175 **Local site of infection by TMV-MP:RFP (at 4 dpi) in *N. benthamiana*. Different zones ahead of**  
1176 **infection (zone I), at the infection front (zone II), behind the infection front (zone III) and in the**  
1177 **center of infection (zone IV) are indicated. Scale bar, 200 µm. (B) Viral dsRNA accumulation in the**  
1178 **different zones of local TMV infection. Inlay images show magnifications of image areas framed by a**  
1179 **dashed line. Scale bar, 20 µm. The MP of TMV is tagged with RFP (MP:RFP) and the accumulating**  
1180 **dsRNA is imaged through binding of the *Flock house virus* B2 protein fused to GFP (B2:GFP). In**  
1181 **cells of zone I (non-infected cells ahead of infection) B2:GFP shows a nucleo-cytoplasmic**  
1182 **distribution, which is the typical distribution of this protein in the absence of dsRNA (Monsion et al.,**  
1183 **2018). In cells at the virus front (zone II), B2:GFP co-localizes to MP:RFP to spots at the cell wall**  
1184 **(likely at PD) indicating the localization of early virus-replication complexes (VRCs) engaged in virus**

1185 replication and virus movement. In zone III, the VRCs have grown in size and accumulate high  
1186 amounts of dsRNA consistent with high levels of virus replication to produce virus progeny. In zone  
1187 IV, the MP is no longer expressed but residual MP:RFP is still seen in PD. The B2:GFP-tagged VRCs  
1188 now appear rounded. (C) Pattern of MP:RFP and callose accumulation in the different zones. Inlays  
1189 show magnifications of the image areas highlighted by dashed boxes. Scale bar, 40  $\mu\text{m}$ . In zone II,  
1190 where MP localizes to PD to facilitate virus movement, and to some extent also still in zone III, the  
1191 PD-associated callose levels are decreased as compared to the other zones. (D) Quantification of PD  
1192 callose in the different zones. The number of analyzed PD is shown in brackets. Two-tailed Mann-  
1193 Whitney test; \*\*\*\*,  $p < 0.0001$ ; ns,  $p > 0.05$ .

1194

1195 **Figure 7. Suppression of poly(I:C)-induced immunity by MP.** (A-E) Inhibition of dsRNA-induced  
1196 callose deposition in MP:RFP-transgenic *N. benthamiana* plants. (A-C) MP:RFP is functional. (A)  
1197 Transgenically expressed MP:RFP localizes to distinct locations at the cell wall. Scale bar, 10  $\mu\text{m}$ . (B)  
1198 The MP:RFP localizes to PD as revealed by callose staining with aniline blue. Scale bar, 10  $\mu\text{m}$ . (C)  
1199 The stably expressed MP:RFP in this line is functional and complements infection upon inoculation  
1200 with *in vitro* transcribed infectious RNA of the MP-deficient TMV $\Delta$ MAC-GFP (Vogler et al., 2008),  
1201 as can be seen by the occurrence of distinct GFP fluorescent infection sites at 7 dpi. (D) and (E)  
1202 Inhibition of dsRNA-induced callose deposition in MP:RFP-transgenic plants. (D) Leaf epidermal  
1203 cells of non-transgenic (WT) and MP:RFP-transgenic plants *N. benthamiana* stained with aniline  
1204 blue. Inlay images show magnifications of image areas framed by a dashed line. Scale bar, 10  $\mu\text{m}$ .  
1205 Treatment of leaf tissues with 0.5  $\mu\text{g}/\mu\text{l}$  poly(I:C) for 30 minutes causes a stronger increase in the  
1206 level of PD-associated callose in WT plants than in MP:RFP-transgenic plants. (E) Quantification of  
1207 callose in leaf epidermal cells upon aniline blue staining. Relative callose content in individual PD  
1208 (blue dots,  $n > 100$ ) as determined in three leaf discs from three plants per treatment. Two-tailed  
1209 Mann-Whitney test; \*\*\*\*,  $p < 0.0001$ . (F) and (G) Inhibition of poly(I:C)-induced PD callose  
1210 deposition by transiently expressed MP:GFP. Leaf disks excised from the GFP, MP:GFP, MP<sup>P81S</sup>:GFP  
1211 or MP<sup>C55</sup>:GFP-expressing leaves 48h after agroinfiltration were incubated for one day in water, then  
1212 transferred into aniline blue solution with and without 0.5  $\mu\text{g}/\mu\text{l}$  poly(I:C) and imaged after 30  
1213 minutes. (F) Images of leaf epidermal cells stained for callose with aniline blue (callose) and  
1214 corresponding images of the same cell area with GFP fluorescence are shown. The ability of MP:GFP  
1215 to reduce the poly(I:C) induction of callose deposition at PD is inhibited by a single amino acid  
1216 exchange mutation in MP (P81S) previously shown to affect its ability to efficiently target PD and to  
1217 function in virus movement. Functional MP with a C-terminal deletion of 55 amino acids (C55) that  
1218 targets PD also inhibits poly(I:C)-induced callose deposition like wildtype MP. (G) Quantification of  
1219 PD-associated callose levels in leaf epidermal cells upon aniline blue staining. Leaf disks from three  
1220 plants per condition were analyzed. Two-tailed Mann-Whitney test; \*\*\*\*,  $p < 0.0001$ . (H) Western  
1221 blot showing that the expression of wild type or mutant MP:GFP does not interfere with flg22-



1222 induced MPK activation. Ponc., Ponceau S-stained Western blot membrane. (I) Inhibition of flg22-  
1223 and poly(I:C)-induced PD callose deposition by MP:RFP as compared to RFP. Leaf disks excised  
1224 from the RFP or MP:RFP-expressing leaves 48 hours after agroinfiltration were incubated for one day  
1225 in water, then transferred into aniline blue solution with and without 0.5  $\mu\text{g}/\mu\text{l}$  poly(I:C) and imaged  
1226 after 30 minutes. Six leaf disks from two plants were evaluated for each condition. \*\*\*\*,  $p < 0.0001$ .  
1227

1228 **Figure 8. Inhibition of poly(I:C)-induced callose deposition by MPs of different viruses.** (A)  
1229 Different MPs are functional. Unlike free RFP, RFP fusions to the MPs of TMV ( $\text{MP}^{\text{TMV}}:\text{RFP}$ ),  
1230 ORMV ( $\text{MP}^{\text{ORMV}}:\text{RFP}$ ), and TVCV ( $\text{MP}^{\text{TVCV}}:\text{RFP}$ ) complement the movement function of MP-  
1231 deficient  $\text{TMV}\Delta\text{M-GFP}$  in *N. benthamiana*. Leaves were co-infiltrated with agrobacteria containing  
1232 the respective RFP or MP:RFP-encoding plasmids together with highly diluted agrobacteria ( $\text{OD}_{600\text{ nm}} = 1 \times 10^{-5}$ )  
1233 for agro-inoculation with  $\text{TMV}\Delta\text{M}\Delta\text{CP-GFP}$ . Pictures were taken at 5 dpi. Scale bar, 1  
1234 cm. (B)  $\text{MP}^{\text{TMV}}:\text{RFP}$ ,  $\text{MP}^{\text{ORMV}}:\text{RFP}$ , and  $\text{MP}^{\text{TVCV}}:\text{RFP}$  localize to PD as shown by the presence of  
1235 callose. MP-expressing leaves were stained with aniline blue and imaged after 30 minutes. Inlay  
1236 images show magnifications of image areas framed by a dashed line. Scale bar, 20  $\mu\text{m}$ . (C)  
1237 Expression of either  $\text{MP}^{\text{TMV}}:\text{RFP}$ ,  $\text{MP}^{\text{ORMV}}:\text{RFP}$ , or  $\text{MP}^{\text{TVCV}}:\text{RFP}$  strongly reduces the induction of PD  
1238 callose deposition in the presence of poly(I:C). Leaf disks excised from the RFP (control) or MP:RFP-  
1239 expressing leaves 48h after agroinfiltration were incubated for one day in water, then transferred into  
1240 aniline blue solution with and without 0.5  $\mu\text{g}/\mu\text{l}$  poly(I:C) and imaged after 30 minutes. For each  
1241 treatment, three images of three leaf disks taken from three plants were analyzed for PD-associated  
1242 callose levels. RFP data are combined data from the 27 leaf disks that were used as RFP control in the  
1243 individual agroinfiltration experiments. The increase in poly(I:C)-induced PD-callose levels seen in  
1244 the presence of poly(I:C) as compared to the water-treated control is shown in percent (%). Two-  
1245 tailed Mann-Whitney test; \*\*\*\*,  $p < 0.0001$ ; \*\*\*,  $p = 0.0002$ .

1246  
1247 **Figure 9. Poly(I:C) enters plant cells.** (A) B2:GFP-transgenic *N. benthamiana* leaf tissue treated  
1248 with water (control) or 0.5  $\mu\text{g}/\mu\text{l}$  poly(I:C) and imaged with ImageJ “green” (left) and “6 shades”  
1249 (right) color look-up tables (LUT). The “6 shades” LUT assigns 6 colors to specific ranges of pixel  
1250 intensity values and low intensity pixels are shown in red color. As compared to the control treatment,  
1251 the poly(I:C) treatment results in an enrichment of red color pixels in the periphery of the cells.  
1252 Highlighted regions of interest (ROI) are further analyzed in (C) and (D). Scale bar, 50  $\mu\text{m}$ . (B)  
1253 Histograms showing the number of pixels for each of the 65536 tonal values stored in the 16-bit “6  
1254 shades” LUT images. As compared to the control image histogram, the poly(I:C) image histogram  
1255 shows an increased number of “red” pixel values. (C) and (D) Surface plot and histogram analysis of  
1256 the ROIs shown in (A). As compared to the surface plots of the control image ROIs, the surface plots  
1257 of ROIs within the poly(I:C) image indicate a strong accumulation of B2:GFP along the periphery of



1258 the cells. This is also indicated by the corresponding histograms indicating the increased amount of  
1259 red, low intensity B2:GFP pixels in the poly(I:C) ROIs as compared to the control ROIs. These  
1260 observations have been confirmed by analyzing 8 images per treatment.

1261

1262 **Figure 10. Virus infection facilitated by virus-encoded effector proteins.** (A) and (B) Suppression  
1263 of PTI by MP. (A) Perception of dsRNA produced in cortical ER-associated VRCs at the PM by an  
1264 unknown cytoplasmic or membrane-associated pathogen recognition receptor (PRR) and the SERK1  
1265 co-receptor (with potential contribution by one or more other co-receptors) triggers a signaling  
1266 pathway leading to callose deposition and PD closure. dsRNA produced during infection may require  
1267 secretion into the apoplasm to allow perception at the PM (dashed blue lines and arrows). Externally  
1268 applied poly(I:C) may be perceived from the apoplasm or secreted upon initial uptake by the cells  
1269 (dashed gray lines and arrows). (B) MP suppresses dsRNA-triggered callose deposition and allows  
1270 intercellular spread of the viral ribonucleoprotein complex (vRNP). The MP may interact with  
1271 intracellular PTI signaling as indicated or interact with callose synthesizing or degrading enzymes at  
1272 PD. The MP may also be secreted to inhibit dsRNA perception at the PM. (C) dsRNA triggers PTI  
1273 and antiviral RNA silencing and both responses are suppressed by viral effector proteins to support  
1274 virus propagation. Whereas MP acts in cells at the virus front to facilitate virus movement by blocking  
1275 a dsRNA-induced callose defense response at PD, the VSR blocks dsRNA-induced antiviral RNA  
1276 silencing in the center of infection sites to support virus replication and production of virus progeny.  
1277 A local infection site of TMV encoding MP fused to GFP (TMV-MP:GFP, 7 dpi) in *N. benthamiana*  
1278 is shown. Scale bar, 1 mm.

1279

## 1280 **Supplemental Data**

1281

1282 **Table S1:** Primers used for RT-qPCR.

1283

1284 **Figure S1:** Development of TMV-GFP infection sites in *N. benthamiana* treated with water,  
1285 poly(I:C), or flg22. Poly(I:C) and, to some extent, also flg22 treatment delays virus movement.  
1286 Infection sites in leaves treated with poly(I:C) are smaller, and the rate by which these infection sites  
1287 increase their size is lower than in infection sites in leaves treated with either water (control) or flg22  
1288 (supports **Figure 1A** and **B**).

1289

1290

1291

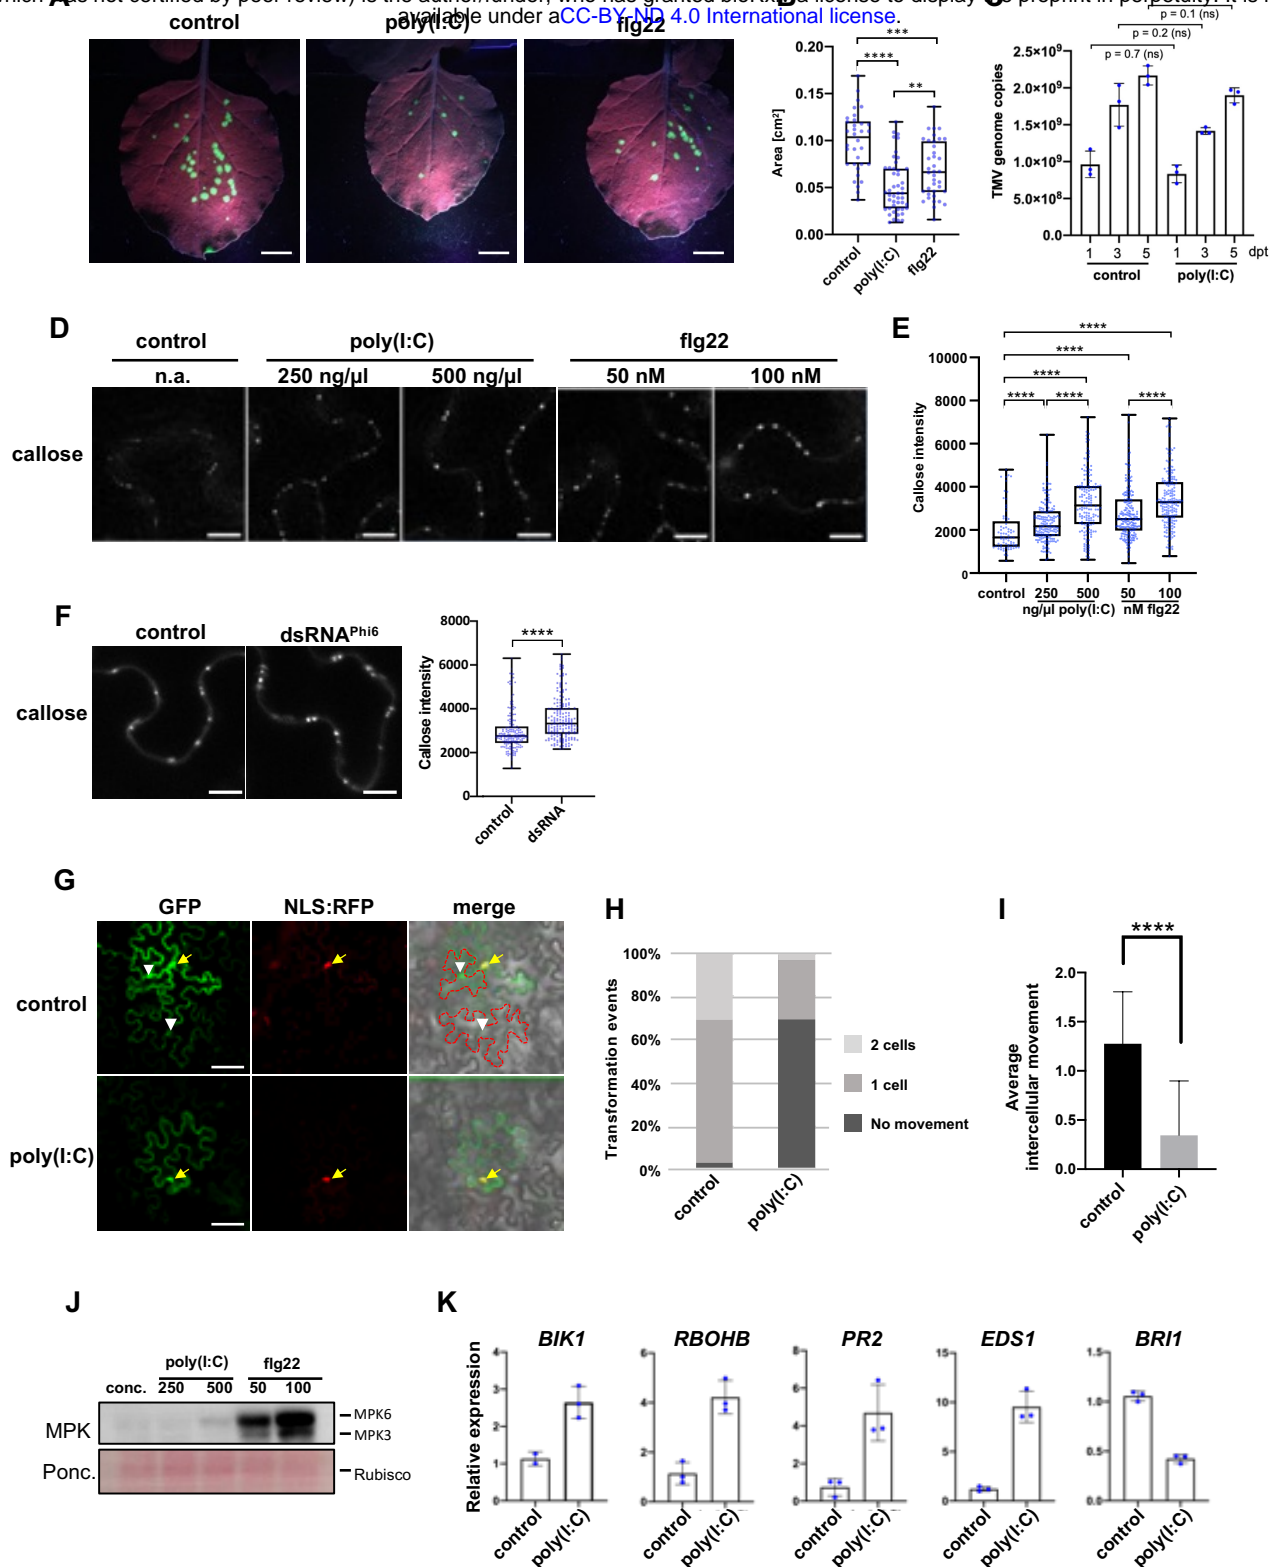

**Figure 1. Poly(I:C) treatment causes inhibition of virus movement in *N. benthamiana*.** (A) TMV-GFP infection sites in *N. benthamiana* leaves at 7 days post inoculation (dpi) with the virus together with either water (control), 0.5  $\mu\text{g}/\mu\text{l}$  ( $\approx 1 \mu\text{M}$ ) poly(I:C), or 1  $\mu\text{M}$  flg22. Scale bar, 1 cm. (B) Sizes of individual infection sites measured in 10 leaf samples collected from three plants per treatment. Two-tailed Mann-Whitney test; \*\*\*\*,  $p < 0.0001$ ; \*\*\*,  $p < 0.001$ ; \*\*,  $p < 0.01$ . The experiment was performed three times with similar results. (C) TMV replication in *N. benthamiana* is not influenced by poly(I:C). A cell-autonomous, MP-deficient TMV replicon (TMV $\Delta\text{M}\Delta\text{C}$ -GFP) expressed in cells of agroinoculated leaves produces the same number of RNA genome copies in the presence and absence of treatment with 0.5  $\mu\text{M}$  poly(I:C), as determined by Taqman RT-qPCR. Poly(I:C) and control treatments were applied 1 day after agroinoculation and results obtained at indicated days after this treatment (dpt) are shown. The data represent means of three biological replicates (with SD) per time point and treatment. Two-tailed Mann-Whitney test. ns, not significant. (D) and (E) Treatment of *N.*

bioRxiv preprint doi: <https://doi.org/10.1101/2022.11.21.517408>; this version posted November 23, 2022. The copyright holder for this preprint (which was not certified by peer review) is the author/funder, who has granted bioRxiv a license to display the preprint in perpetuity. It is made available under aCC-BY-NC-ND 4.0 International license.

**(D)** Callose fluorescence at PD in *N. benthamiana* leaf epidermal cells. Scale bar, 50  $\mu$ m. **(E)** Relative callose content in individual PD (blue dots,  $n > 100$ ) as determined in three leaf discs per treatment. Two-tailed Mann-Whitney test; \*\*\*\*,  $p = < 0.0001$ . **(F)** Callose deposition at PD in *N. benthamiana* leaf epidermal tissue 30 minutes after treatment with 50 ng/ $\mu$ l biological dsRNA (dsRNA<sup>Phi6</sup>). Relative callose content in individual PD (blue dots,  $n > 100$ ) as determined in three leaf discs per treatment. Two-tailed Mann-Whitney test; \*\*\*\*,  $p = < 0.0001$ . **(G-I)** GFP mobility assay in *N. benthamiana*. Leaf disks expressing GFP together with cell-autonomous NLS:RFP one day after agroinfiltration were treated with water or 0.5  $\mu$ g/ $\mu$ l poly(I:C) and imaged 48 hours later. **(G)** Example of GFP movement from an epidermal cell marked by cell-autonomous NLS:RFP into adjacent cells. Transiently expressed GFP shows a nucleocytoplasmic distribution (yellow arrow) and its movement from the expressing epidermal cell (co-expressed NLS:RFP in the nucleus, in red) is evident by appearance of green fluorescence in the nuclei and cytoplasm of adjacent cells (white arrowheads). Cells into which GFP moved are indicated by the red dashed line in the merged image. Scale bar, 50  $\mu$ m. **(H and I)** Quantification of GFP movement between epidermal cells in leaf disks exposed to 0.5  $\mu$ g/ $\mu$ l poly(I:C) or water (control) (29 transformation events were analyzed for each treatment). **(H)** Stacked column diagram showing the relative frequency of transformation events associated with either no GFP movement (dark grey), GFP movement into one adjacent cell layer (medium grey), or GFP movement into two adjacent cell layers (light grey). **(I)** Average intercellular movement (total number of cell layers into which GFP has moved divided by the number of evaluated transformation events). Two-tailed Mann-Whitney test; \*\*\*\*,  $p = < 0.0001$ . A repetition of the GFP mobility assay provided similar results. **(J)** Low level of MPK activation by poly(I:C) relative to flg22 after 30 minutes. Concentrations (conc.) are in ng/ $\mu$ l for poly(I:C) and in nM for flg22. The experiment was performed three times with similar results. **(K)** Poly(I:C) induces innate immunity marker genes, but suppresses expression of *BRI1*, in *N. benthamiana*. Mean value and SD of gene expression values obtained by RT-qPCR with three biological replicates (blue dots) harvested three hours after treatment.

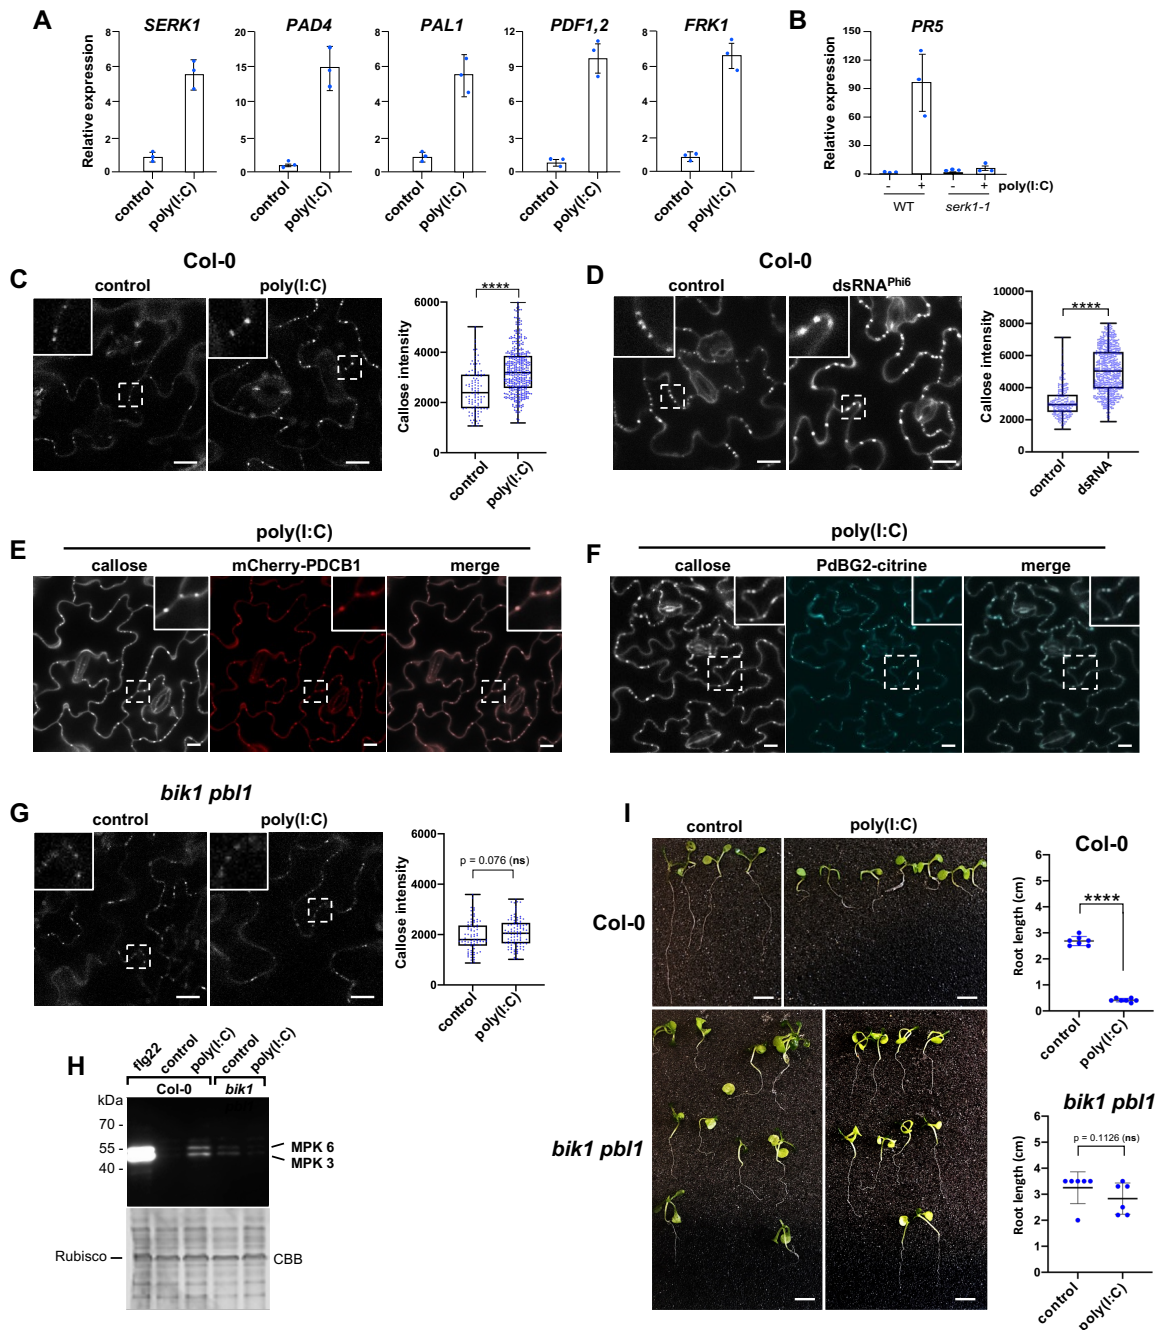

**Figure 2. Poly(I:C)-induced signaling in Arabidopsis depends on BIK1/PBL1.** (A) and (B) Transcriptional regulation of Arabidopsis genes three hours after treatment with 0.5  $\mu\text{g}/\mu\text{l}$  poly(I:C). For each gene, the mean value and the SD of gene expression values obtained by RT-qPCR analysis of three biological replicates (blue dots) is shown. (A) Poly(I:C) induces innate immunity marker genes in *A. thaliana* Col-0 wildtype. (B) Absence of poly(I:C)-induced *PR5* expression in the *serk1-1* mutant. (C) Poly(I:C) treatment causes callose deposition at PD in *A. thaliana* Col-0. Images were taken 30 minutes after treatment. Inlays show enlargements of the areas within the dashed boxes. Scale bar, 20  $\mu\text{m}$ . Relative callose content in individual PD (blue dots,  $n > 100$ ) as determined in three leaf discs from three plants per treatment. Two-tailed Mann-Whitney test; \*\*\*\*,  $p = <0.0001$ . (D) Callose deposition at PD in *A. thaliana* Col-0 leaf epidermal tissue 30 minutes after treatment with 50  $\text{ng}/\mu\text{l}$  of biological dsRNA (dsRNA<sup>Phi6</sup>). Inlays show enlargements of the areas within the dashed boxes. Scale bar, 20  $\mu\text{m}$ . Relative callose content in individual PD (blue dots,  $n > 100$ ) as determined in three leaf discs per treatment. Two-tailed Mann-Whitney test; \*\*\*\*,  $p = <0.0001$ . (E) and (F) Poly(I:C)-induced callose spots are localized to PD as shown by co-localization with PD markers mCherry-PDCB1 (E) and PdBG2-citrine (F). Inlays show enlargements of the areas within the dashed boxes. Scale bar, 10  $\mu\text{m}$ . (G) poly(I:C)-induced callose deposition in PD is inhibited in the *bik1 pbl1* mutant. Images were taken 30 minutes after treatment and the WT control of the same experiments is shown in (C). Inlays show enlargements of the areas within the dashed boxes. Scale bar, 20  $\mu\text{m}$ . Relative callose content in individual PD (blue dots) as determined in three leaf discs per treatment. Two-tailed Mann-Whitney test; ns, non-significant. (H) Poly(I:C)-induced MPK activation is reduced in the *bik1 pbl1* mutant. Immunoblot detection of phosphorylated MPK. Samples were harvested 30 minutes after treatment with 0.5  $\mu\text{g}/\mu\text{l}$  poly(I:C), 1  $\mu\text{M}$  flg22, or water. “*bik1*” stands for *bik1 pbl1*.

CBB, Coomassie brilliant blue-stained gel showing staining of ribulose-bisphosphate-carboxylase (Rubisco) as gel loading control. (I) *bik1 pbl1* plants do not show significant seedling root growth inhibition in the presence of poly(I:C) as compared to WT Col-0 plants. Seedlings were kept for 12 days in 0.5  $\mu\text{g}/\mu\text{l}$  poly(I:C) or water. Scale bar, 1 cm. Quantification of poly(I:C)-induced root growth inhibition in *A. thaliana* WT Col-0 and *bik1 pbl1* seedlings. Analysis of 6-7 seedlings (blue dots) per condition. Two-tailed Mann-Whitney test; \*\*\*\*,  $p < 0.0001$ ; ns, non-significant.

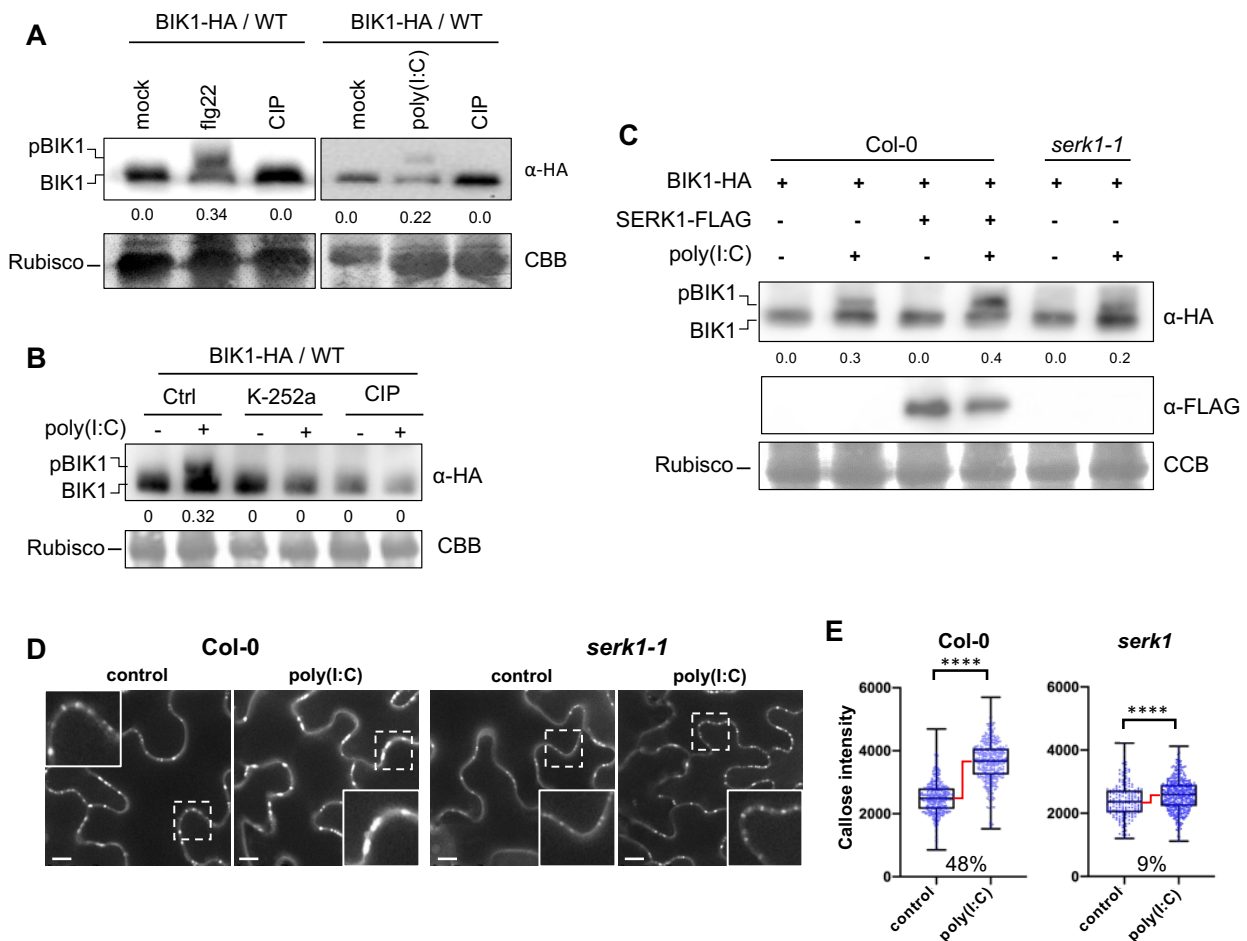

**Figure 3. Poly(I:C) causes BIK1 phosphorylation and PD callose deposition in a SERK1-dependent manner.** (A) to (C) Analysis of BIK1 phosphorylation in poly(I:C)-treated *A. thaliana* Col-0 protoplasts. (A) Poly(I:C) treatment induces BIK1 phosphorylation as shown by a protein mobility shift detected by Western blot analysis. Protoplasts expressing BIK1-HA were non-treated (mock) or treated with 1  $\mu$ M flg22 or 0.5  $\mu$ g/ $\mu$ l poly(I:C), lysed after 20 minutes and treated or non-treated with calf intestine phosphatase (CIP) for 60 before Western blot analysis using HA-HRP antibody. BIK1 band intensities were quantified using Image Lab (Bio-Rad). Quantification of BIK1 phosphorylation (upper panel) calculated as ratio of intensity of the upper band (phosphorylated BIK1, pBIK1) to the sum intensities of shifted and non-shifted bands (pBIK1 + BIK1) (no treatment set to 0.0). CCB, Coomassie brilliant blue staining of Rubisco as gel loading control (lower panel). (B) Poly(I:C)-induced BIK1 phosphorylation is blocked by 1  $\mu$ M of the kinase inhibitor K-252a added 1 hour before poly(I:C) treatment. Rubisco detection by CBB staining is shown as gel loading control (lower panel). Experimental conditions and quantification of BIK1 phosphorylation as in (A). (C) SERK1 enhances poly(I:C)-induced BIK1 phosphorylation. Protoplasts from WT Col-0 or *serk1-1* mutants were transfected with BIK1-HA together with or without SERK1-FLAG and followed by treatment with or without 0.5  $\mu$ g/ $\mu$ l poly(I:C). Phosphorylated BIK1 band intensities were quantified as in (A). The middle panel shows SERK1-FLAG expression. Rubisco detection by CBB staining is shown as gel loading control (lower panel). (D) and (E) Poly(I:C)-induced PD callose deposition depends on SERK1. (D) Callose fluorescence at PD seen upon aniline blue staining of epidermal cells of WT Col-0 plants and *serk1-1* mutants treated with water (control) or 0.5  $\mu$ g/ $\mu$ l poly(I:C). Inlays show enlargements of the areas within the dashed boxes. Scale bar, 10  $\mu$ m. (E) Relative callose content (fluorescence intensity) in individual PD (blue dots,  $n > 100$ ) as determined in three leaf discs taken from three plants per treatment. Two-tailed Mann-Whitney test; \*\*\*\*,  $p = < 0.0001$ . The increase in PD callose levels in poly(I:C)-treated samples relative to water control-treated samples is shown in percent (%). Although the callose intensity data distributions between poly(I:C)-treated and control-treated samples are significantly different in both WT Col-0 and *serk1-1*, the comparison of the callose intensity median levels indicate a drastic inhibition of the poly(I:C)-induced PD callose deposition response in *serk1* as compared to the WT.



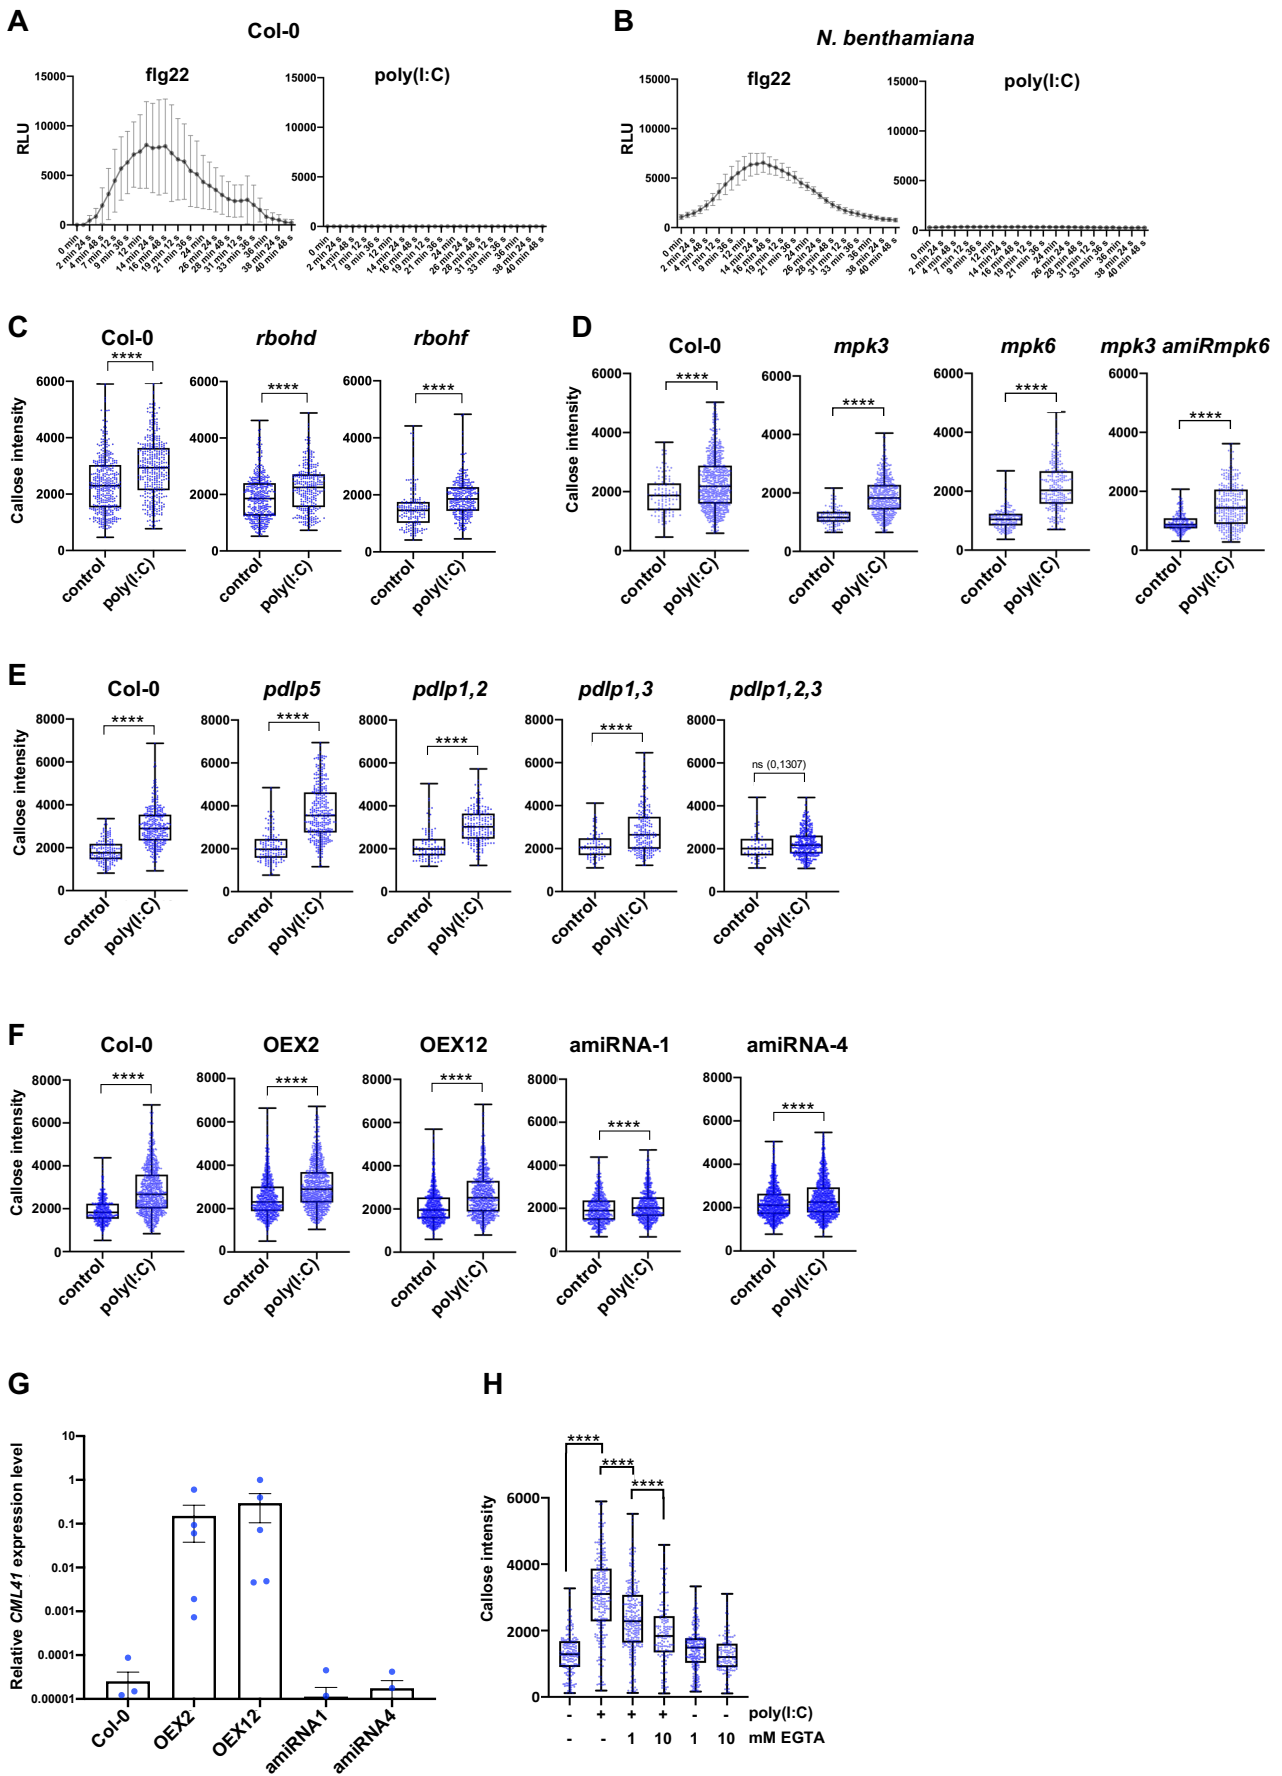

**Figure 4. poly(I:C)-induced PD callose deposition is ROS- and MPK3/6 cascade-independent but requires PDLP1/2/3 and CML41.** (A) and (B) Unlike treatment with 1  $\mu$ M flg22, the treatment with 0.5  $\mu$ g/ $\mu$ l poly(I:C) does not induce any ROS production in Arabidopsis (A) or *N. benthamiana* (B). RLU, relative luminescence units. Mean values (black dots) and error bars (SD) obtained for each time point for 10 replicates (leaf disks) per treatment. (C) Poly(I:C)-induced callose deposition at PD is not affected in *rbohD* or *rbohF* mutants. Relative callose content in individual PD (blue dots, n > 100) 30 minutes after treatment with 0.5  $\mu$ g/ $\mu$ l poly(I:C) or water and determined in three leaf discs from three

plants per treatment. Two-tailed Mann-Whitney test; \*\*\*\*,  $p < 0.0001$ . **(D)** Poly(I:C)-induced callose deposition at PD is not affected in *mpk3* and *mpk6* single mutants, and neither in a *mpk3* mutant in which *MPK6* is silenced by an artificial miRNA (*mpk3 amiRmpk6*). Relative callose content in individual PD (blue dots,  $n > 100$ ) 30 minutes after treatment with 0.5  $\mu\text{g}/\mu\text{l}$  poly(I:C) or water and determined in three leaf discs from three plants per treatment. Two-tailed Mann-Whitney test; \*\*\*\*,  $p < 0.0001$ . **(E)** poly(I:C)-induced callose deposition at PD is independent of PDLP5 but depends on the redundantly acting PDLP1, PDLP2, and PDLP3. Relative callose content in individual PD (blue dots,  $n > 100$ ) 30 minutes after treatment with 0.5  $\mu\text{g}/\mu\text{l}$  poly(I:C) or water and determined in three leaf discs from three plants per treatment. Two-tailed Mann-Whitney test; \*\*\*\*,  $p < 0.0001$ ; ns, non-significant. **(F)** and **(G)** Poly(I:C)-induced callose deposition at PD depends on CML41. **(F)** PD callose deposition levels in poly(I:C)-treated and control-treated leaf disks of two *CML41*-overexpressing lines (OEX2 and OEX12) and of two lines in which the expression of *CML41* is reduced by expression of artificial miRNA (amiRNA1 and amiRNA4). As compared to the WT (Col-0) and the *CML41*-overexpressing lines, the inducibility of PD callose deposition by poly(I:C) is strongly decreased in the amiRNA lines. Relative callose content in individual PD (blue dots,  $n > 100$ ) 30 minutes after treatment with 0.5  $\mu\text{g}/\mu\text{l}$  poly(I:C) or water and determined in three leaf discs from three plants per treatment. Two-tailed Mann-Whitney test; \*\*\*\*,  $p < 0.0001$ . According to the Mann-Whitney test the distribution of individual PD callose intensities is different between all control- and poly(I:C)-treated samples. However, unlike in WT Col-0 and *CML41*-overexpressing lines, the median PD callose intensity levels are not increased upon poly(I:C)-treatment in amiRNA lines thus indicating a deficiency in the induction of PD callose deposition upon poly(I:C) treatment in these lines. **(G)** Relative levels of *CML41* expression in plants of the OEX2, OEX12, amiRNA1 and amiRNA4 lines in comparison to WT (Col-0), as determined by RT-qPCR. Mean value and standard error of gene expression values obtained by RT-qPCR with 3-6 biological replicates (blue dots). **(H)** poly(I:C)-induced callose deposition is reduced in the presence of EGTA. Relative callose content in individual PD (blue dots,  $n > 100$ ) as determined in three leaf discs per treatment. Two-tailed Mann-Whitney test; \*\*\*\*,  $p < 0.0001$ .

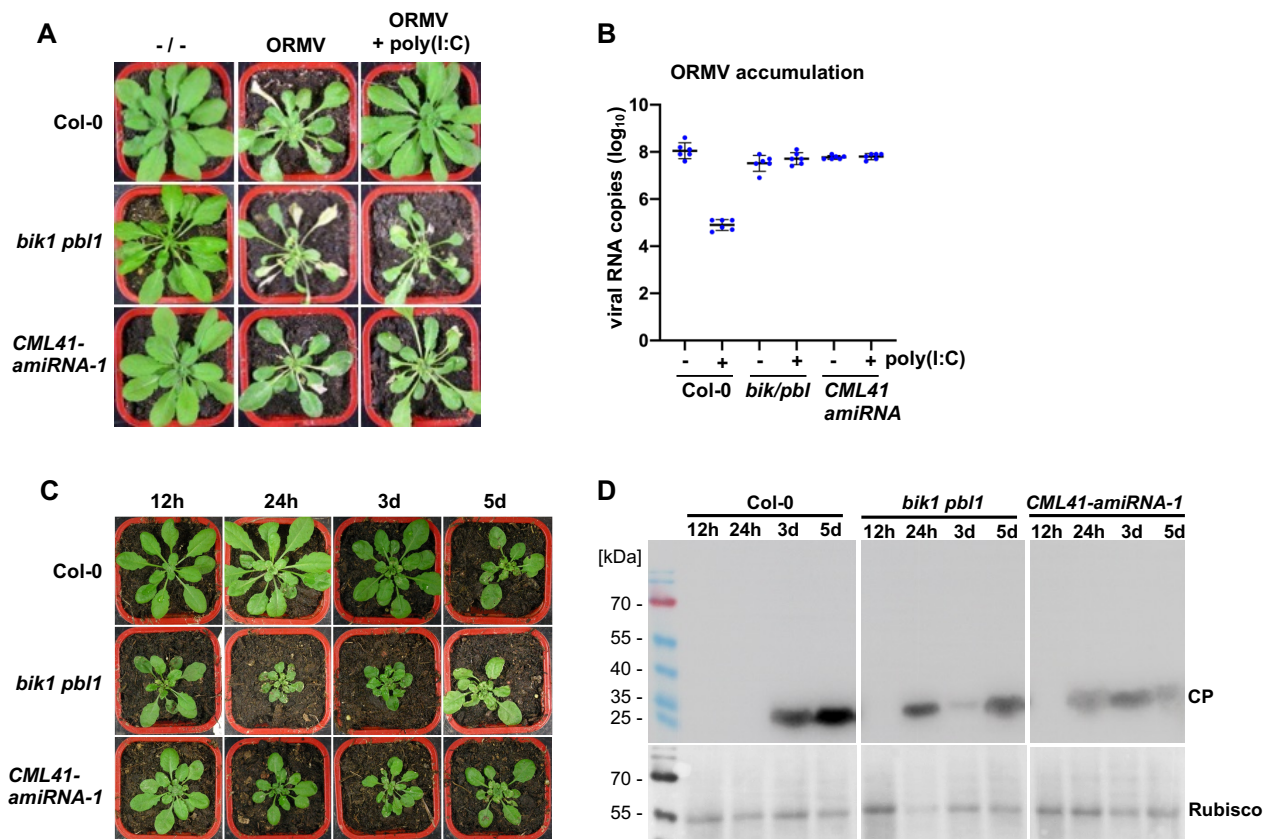

**Figure 5. BIK1/PBL1 and CML41 are required for antiviral defense (A) and (B) Disease symptoms (A) and viral RNA accumulation (B) at 28 dpi in wild-type plants and mutants inoculated with ORMV in the presence and absence of 0.5  $\mu\text{g}/\mu\text{l}$  poly(I:C). Unlike in wild-type plants (Col-0) the antiviral effect of poly(I:C) treatment is lost in *bik1 pbl1* mutants and *CML41-amiRNA-1* expressing plants. Viral RNA accumulation (B) is depicted for 6 biological replicates per condition. Mean values and standard errors are shown. (C) and (D) BIK1 and CML41 inhibit virus movement. (C) Representative symptom phenotypes at 21 dpi of Arabidopsis Col-0 plants, *bik1 pbl1* mutant plants and plants transgenic for *CML41-amiRNA-1* that were locally inoculated with ORMV and from which the inoculated leaves were removed at the indicated times in hours (h) and days (d). Whereas systemic leaves of Col-0 plants show symptoms on plants that carried the inoculated leaves for 3 or more days following inoculation, the systemic leaves of the *bik1 pbl1* mutant and of the *CML41-amiRNA-1* expressing plants show symptoms already if the inoculated leaves were present for only 24 hours. (D) Immunoblot analysis of the youngest systemic leaves at 21 dpi using antibodies against viral coat protein (CP) (*Youcai mosaic virus* antibody, AS-0527, DSMZ, Braunschweig, Germany). The pattern of CP expression in the systemic leaves confirms that in WT Col-0 plants the virus needs between 24 h and 3 d to exit the inoculated leaves and move systemically, whereas the time needed for systemic movement is reduced to less than 24 h in the *bik1 pbl1* mutant and of the *CML41-amiRNA-1* expressing plants, thus indicating a role of BIK1 and CML41 in restricting virus movement.**

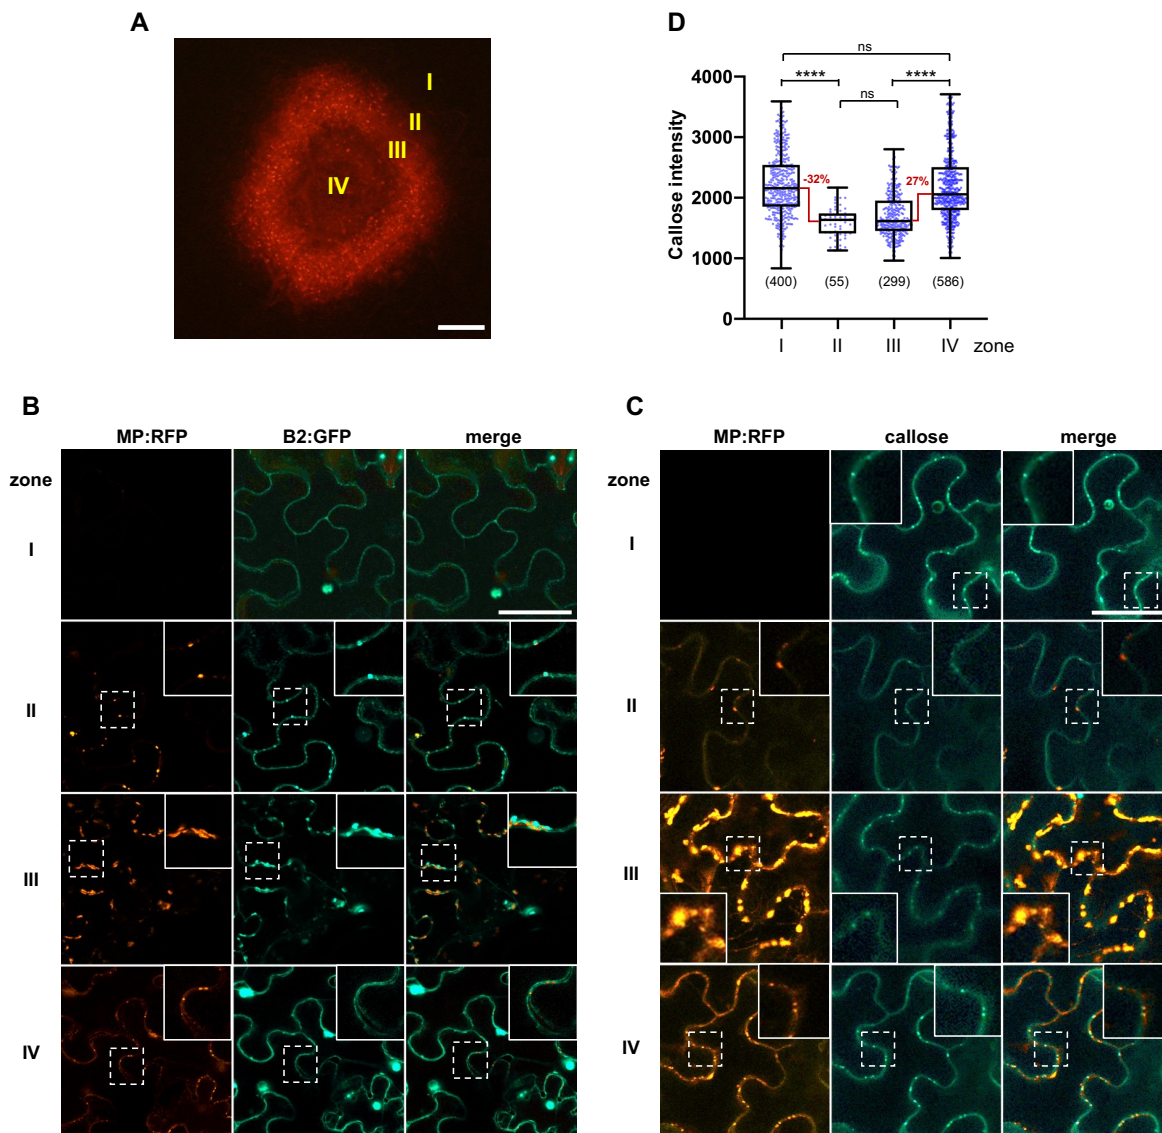

**Figure 6. Viral MP expression correlates with a suppression of PD-associated callose levels.** (A) Local site of infection by TMV-MP:RFP (at 4 dpi) in *N. benthamiana*. Different zones ahead of infection (zone I), at the infection front (zone II), behind the infection front (zone III) and in the center of infection (zone IV) are indicated. Scale bar, 200  $\mu$ m. (B) Viral dsRNA accumulation in the different zones of local TMV infection. Inlay images show magnifications of image areas framed by a dashed line. Scale bar, 20  $\mu$ m. The MP of TMV is tagged with RFP (MP:RFP) and the accumulating dsRNA is imaged through binding of the *Flock house virus* B2 protein fused to GFP (B2:GFP). In cells of zone I (non-infected cells ahead of infection) B2:GFP shows a nucleo-cytoplasmic distribution, which is the typical distribution of this protein in the absence of dsRNA (Monson et al., 2018). In cells at the virus front (zone II), B2:GFP co-localizes to MP:RFP to spots at the cell wall (likely at PD) indicating the localization of early virus-replication complexes (VRCs) engaged in virus replication and virus movement. In zone III, the VRCs have grown in size and accumulate high amounts of dsRNA consistent with high levels of virus replication to produce virus progeny. In zone IV, the MP is no longer expressed but residual MP:RFP is still seen in PD. The B2:GFP-tagged VRCs now appear rounded. (C) Pattern of MP:RFP and callose accumulation in the different zones. Inlays show magnifications of the image areas highlighted by dashed boxes. Scale bar, 40  $\mu$ m. In zone II, where MP localizes to PD to facilitate virus movement, and to some extent also still in zone III, the PD-associated callose levels are decreased as compared to the other zones. (D) Quantification of PD callose in the different zones. The number of analyzed PD is shown in brackets. Two-tailed Mann-Whitney test; \*\*\*\*,  $p < 0.0001$ ; ns,  $p > 0.05$ .



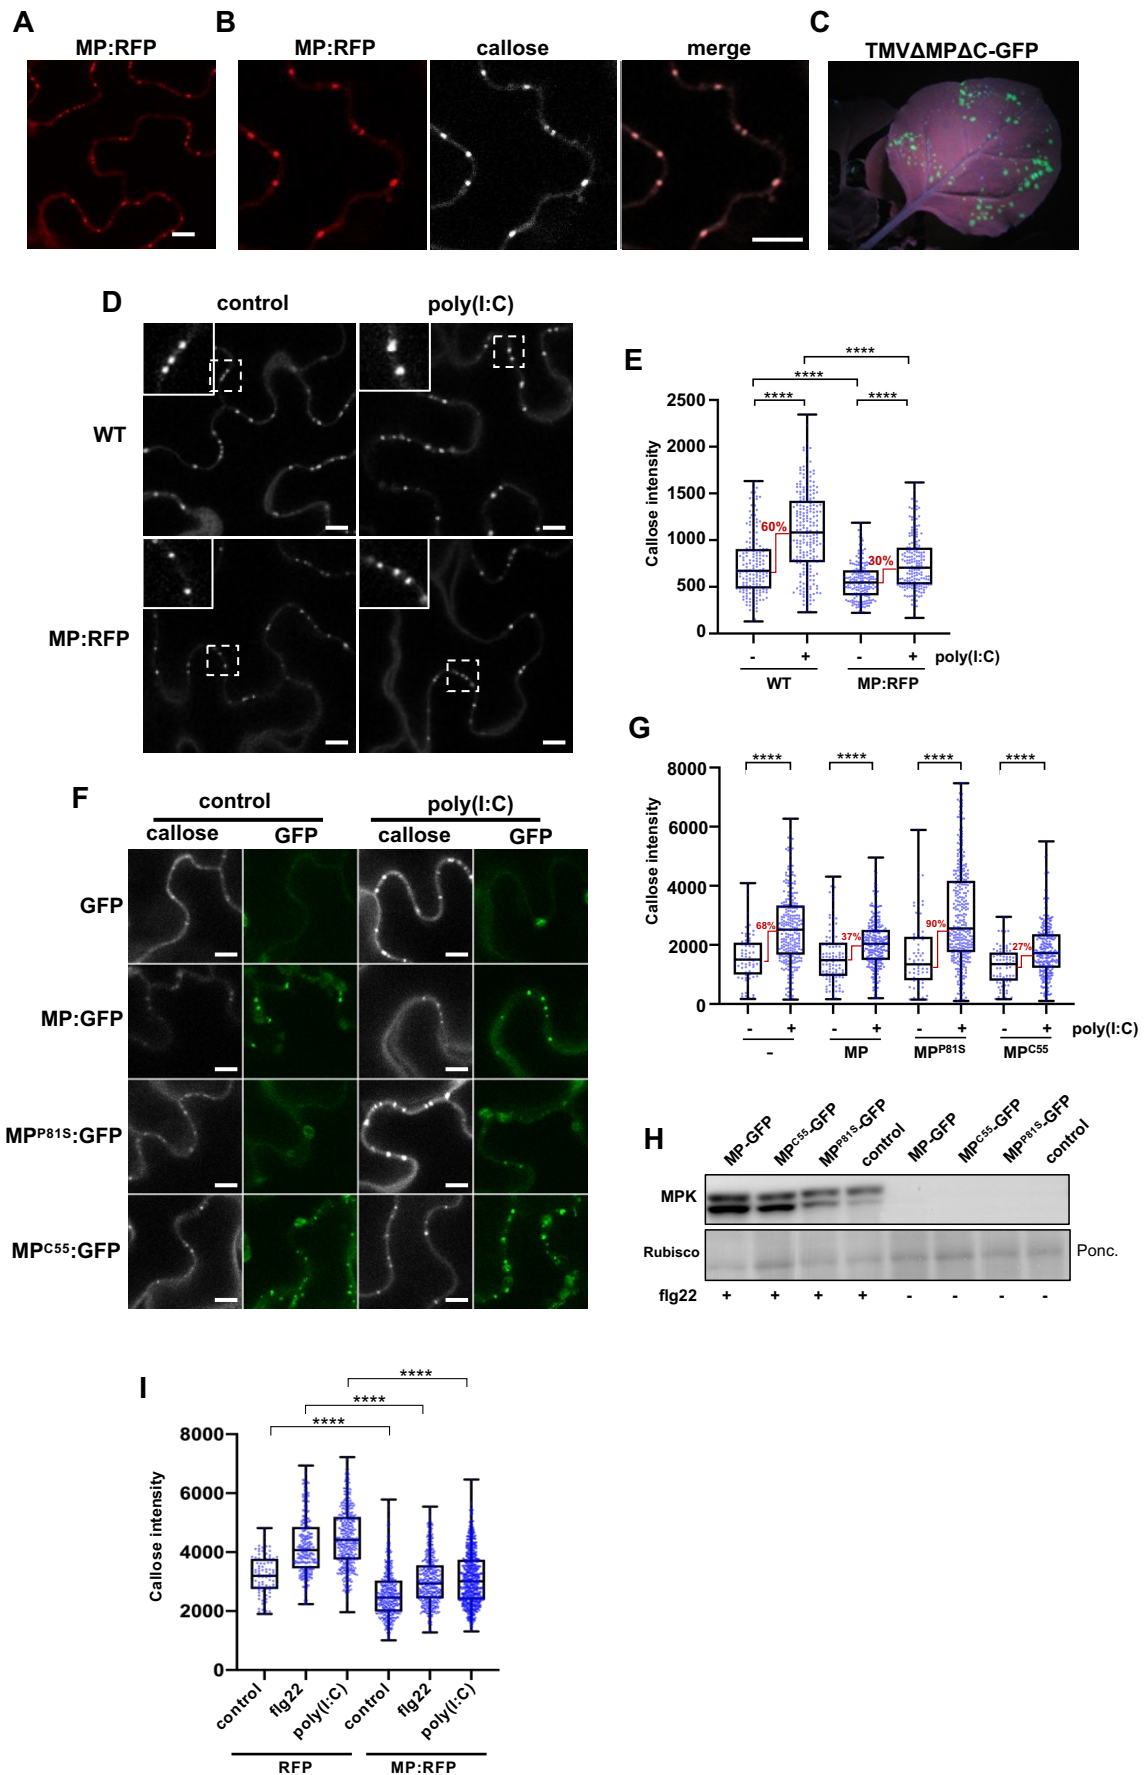

**Figure 7. Suppression of poly(I:C)-induced immunity by MP.** (A-E) Inhibition of dsRNA-induced callose deposition in MP:RFP-transgenic *N. benthamiana* plants. (A-C) MP:RFP is functional. (A) Transgenically expressed MP:RFP localizes to distinct locations at the cell wall. Scale bar, 10  $\mu$ m. (B) The MP:RFP localizes to PD as revealed by callose

staining with aniline blue. Scale bar, 10  $\mu\text{m}$ . (C) The stably expressed MP:RFP in this line is functional and complements infection upon inoculation with *in vitro* transcribed infectious RNA of the MP-deficient TMV $\Delta\text{M}\Delta\text{C}$ -GFP (Vogler et al., 2008), as can be seen by the occurrence of distinct GFP fluorescent infection sites at 7 dpi. (D) and (E) Inhibition of dsRNA-induced callose deposition in MP:RFP-transgenic plants. (D) Leaf epidermal cells of non-transgenic (WT) and MP:RFP-transgenic plants *N. benthamiana* stained with aniline blue. Inlay images show magnifications of image areas framed by a dashed line. Scale bar, 10  $\mu\text{m}$ . Treatment of leaf tissues with 0.5  $\mu\text{g}/\mu\text{l}$  poly(I:C) for 30 minutes causes a stronger increase in the level of PD-associated callose in WT plants than in MP:RFP-transgenic plants. (E) Quantification of callose in leaf epidermal cells upon aniline blue staining. Relative callose content in individual PD (blue dots,  $n > 100$ ) as determined in three leaf discs from three plants per treatment. Two-tailed Mann-Whitney test; \*\*\*\*,  $p < 0.0001$ . (F) and (G) Inhibition of poly(I:C)-induced PD callose deposition by transiently expressed MP:GFP. Leaf disks excised from the GFP, MP:GFP, MP<sup>P81S</sup>:GFP or MP<sup>C55</sup>:GFP-expressing leaves 48h after agroinfiltration were incubated for one day in water, then transferred into aniline blue solution with and without 0.5  $\mu\text{g}/\mu\text{l}$  poly(I:C) and imaged after 30 minutes. (F) Images of leaf epidermal cells stained for callose with aniline blue (callose) and corresponding images of the same cell area with GFP fluorescence are shown. The ability of MP:GFP to reduce the poly(I:C) induction of callose deposition at PD is inhibited by a single amino acid exchange mutation in MP (P81S) previously shown to affect its ability to efficiently target PD and to function in virus movement. Functional MP with a C-terminal deletion of 55 amino acids (C55) that targets PD also inhibits poly(I:C)-induced callose deposition like wildtype MP. (G) Quantification of PD-associated callose levels in leaf epidermal cells upon aniline blue staining. Leaf disks from three plants per condition were analyzed. Two-tailed Mann-Whitney test; \*\*\*\*,  $p < 0.0001$ . (H) Western blot showing that the expression of wild type or mutant MP:GFP does not interfere with flg22-induced MPK activation. Ponc., Ponceau S-stained Western blot membrane. (I) Inhibition of flg22- and poly(I:C)-induced PD callose deposition by MP:RFP as compared to RFP. Leaf disks excised from the RFP or MP:RFP-expressing leaves 48h after agroinfiltration were incubated for one day in water, then transferred into aniline blue solution with and without 0.5  $\mu\text{g}/\mu\text{l}$  poly(I:C) and imaged after 30 minutes. Six leaf disks from two plants were evaluated for each condition. \*\*\*\*,  $p < 0.0001$ .



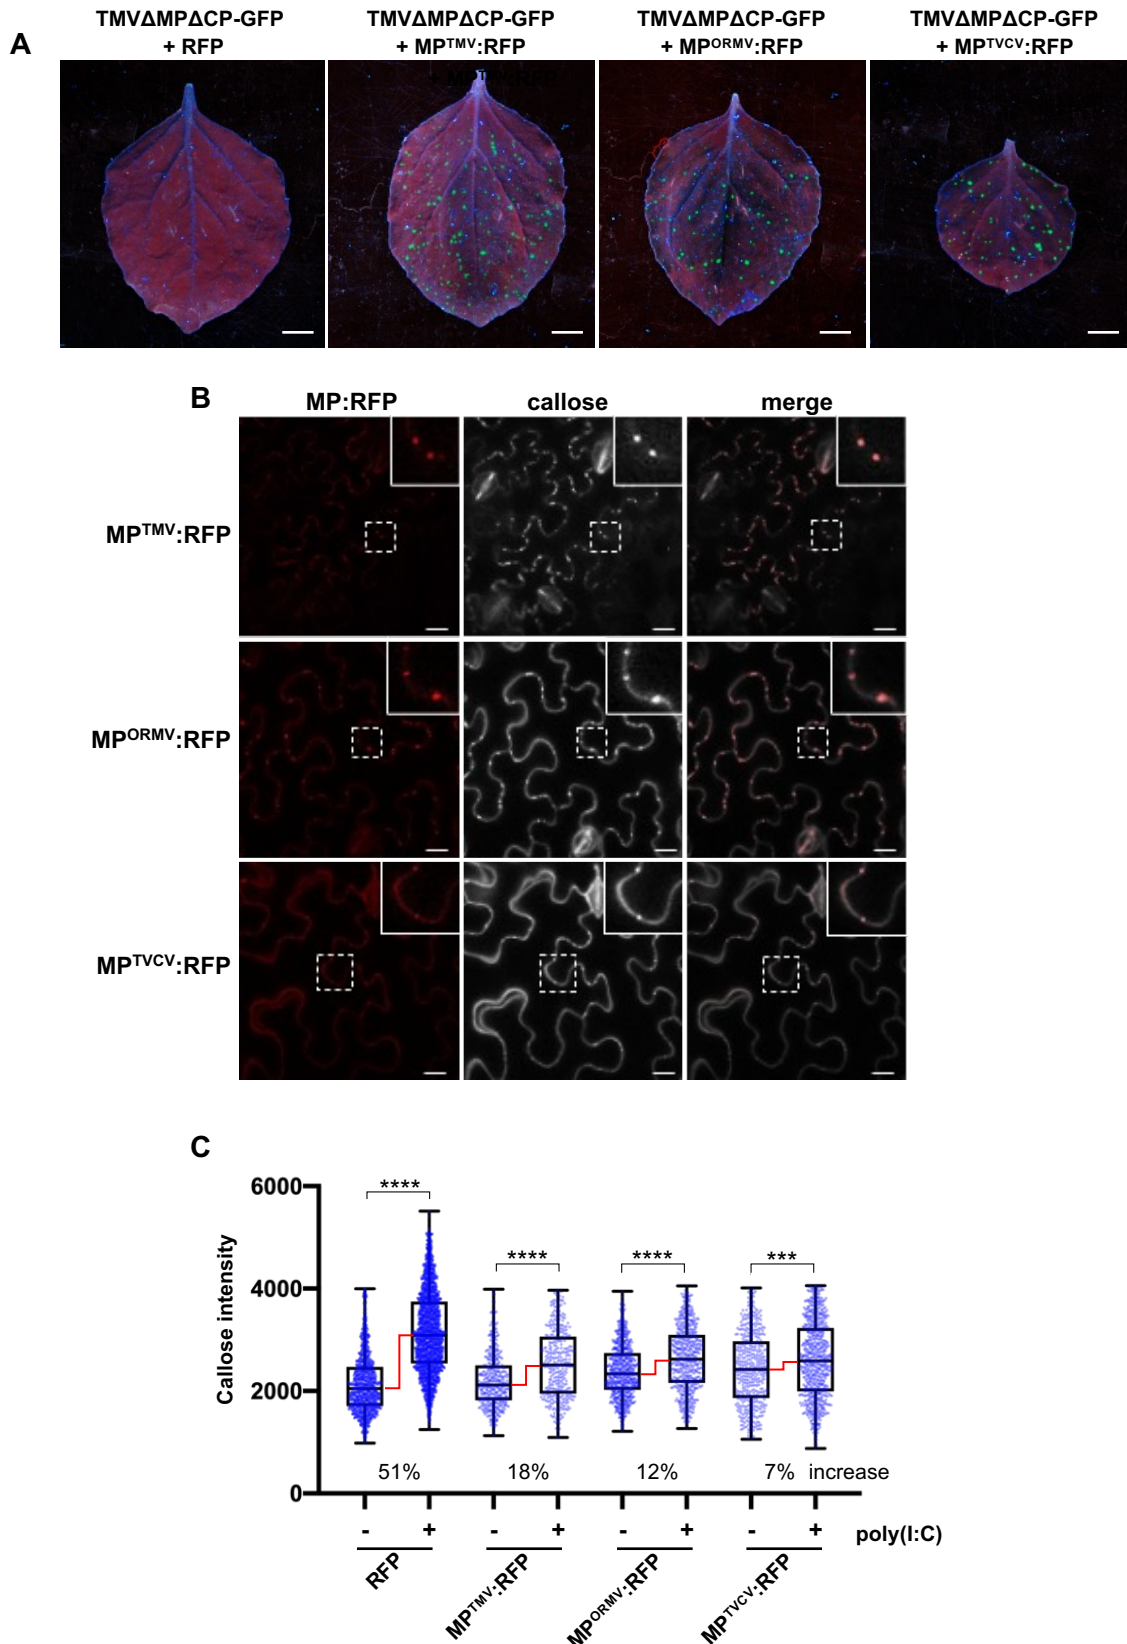

**Figure 8. Inhibition of poly(I:C)-induced callose deposition by MPs of different viruses.** (A) Different MPs are functional. Unlike free RFP, RFP fusions to the MPs of TMV (MP<sup>TMV</sup>:RFP), ORMV (MP<sup>ORMV</sup>:RFP), and TVCV (MP<sup>TVCV</sup>:RFP) complement the movement function of MP-deficient TMV $\Delta$ MP-GFP in *N. benthamiana*. Leaves were co-infiltrated with agrobacteria containing the respective RFP or MP:RFP-encoding plasmids together with highly diluted agrobacteria ( $OD_{600\text{ nm}} = 1 \times 10^{-5}$ ) for agro-inoculation with TMV $\Delta$ MP-GFP. Pictures were taken at 5 dpi. Scale bar, 1 cm. (B) MP<sup>TMV</sup>:RFP, MP<sup>ORMV</sup>:RFP, and MP<sup>TVCV</sup>:RFP localize to PD as shown by the presence of callose. MP-expressing leaves were stained with aniline blue and imaged after 30 minutes. Inlay images show magnifications of image areas framed by a dashed line. Scale bar, 20  $\mu$ m. (C) Expression of either MP<sup>TMV</sup>:RFP, MP<sup>ORMV</sup>:RFP, or MP<sup>TVCV</sup>:RFP strongly

reduces the induction of PD callose deposition in the presence of poly(I:C). Leaf disks excised from the RFP (control) or MP:RFP-expressing leaves 48h after agroinfiltration were incubated for one day in water, then transferred into aniline blue solution with and without 0.5  $\mu\text{g}/\mu\text{l}$  poly(I:C) and imaged after 30 minutes. For each treatment, three images of three leaf disks taken from three plants were analyzed for PD-associated callose levels. RFP data are combined data from the 27 leaf disks that were used as RFP control in the individual agroinfiltration experiments. The increase in poly(I:C)-induced PD-callose levels seen in the presence of poly(I:C) as compared to the water-treated control is shown in percent (%). Two-tailed Mann-Whitney test; \*\*\*\*,  $p < 0.0001$ ; \*\*\*,  $p = 0.0002$ .

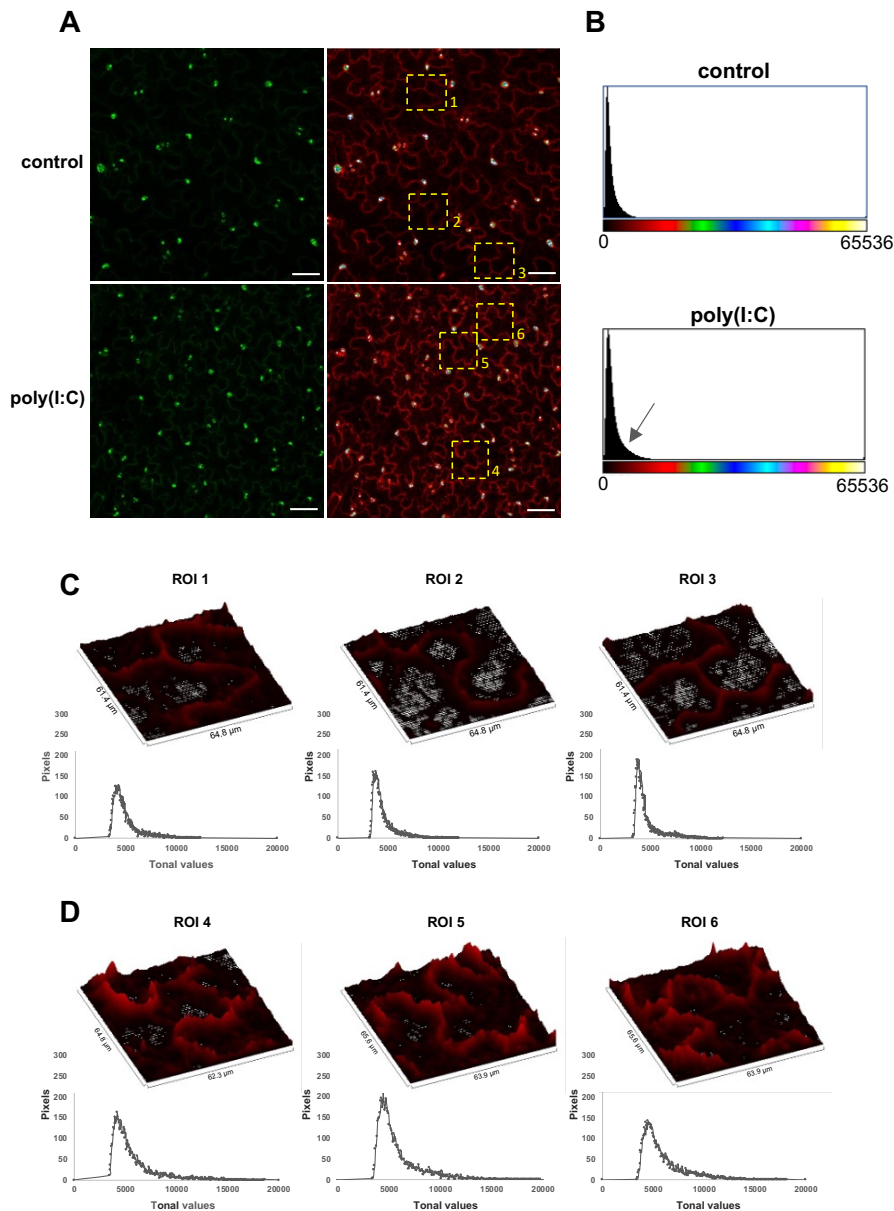

**Figure 9. Poly(I:C) enters plant cells.** (A) B2:GFP-transgenic *N. benthamiana* leaf tissue treated with water (control) or 0.5  $\mu\text{g}/\mu\text{l}$  poly(I:C) and imaged with ImageJ “green” (left) and “6 shades” (right) color look-up tables (LUT). The “6 shades” LUT assigns 6 colors to specific ranges of pixel intensity values and low intensity pixels are shown in red color. As compared to the control treatment, the poly(I:C) treatment results in an enrichment of red color pixels in the periphery of the cells. Highlighted regions of interest (ROI) are further analyzed in (C) and (D). Scale bar, 50  $\mu\text{m}$ . (B) Histograms showing the number of pixels for each of the 65536 tonal values stored in the 16-bit “6 shades” LUT images. As compared to the control image histogram, the poly(I:C) image histogram shows an increased number of “red” pixel values. (C) and (D) Surface plot and histogram analysis of the ROIs shown in (A). As compared to the surface plots of the control image ROIs, the surface plots of ROIs within the poly(I:C) image indicate a strong accumulation of B2:GFP along the periphery of the cells. This is also indicated by the corresponding histograms indicating the increased amount of red, low intensity B2:GFP pixels in the poly(I:C) ROIs as compared to the control ROIs. These observations have been confirmed by analyzing 8 images per treatment.

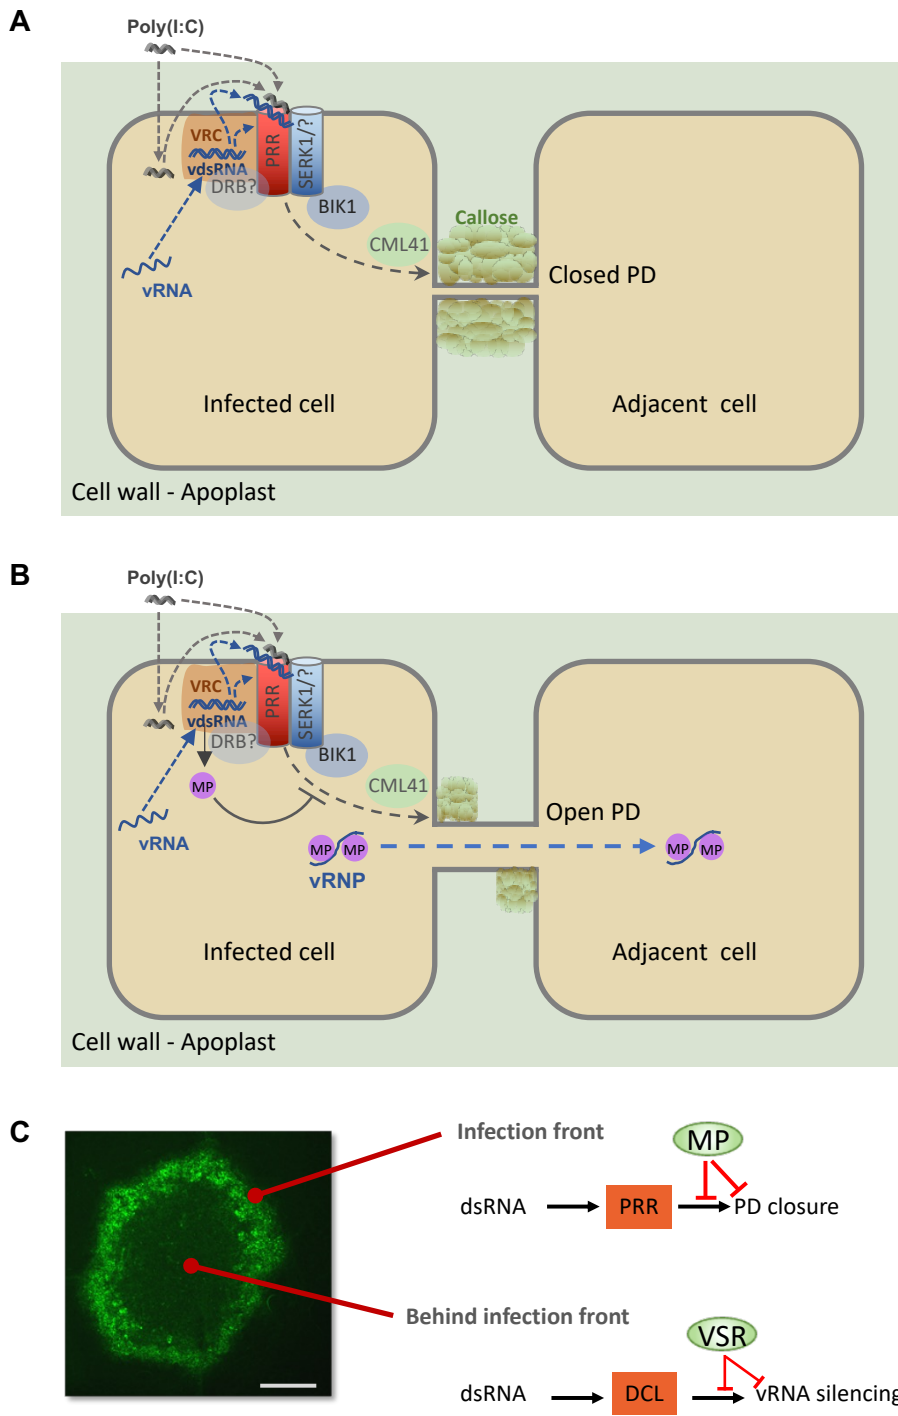

**Figure 10. Virus infection facilitated by virus-encoded effector proteins.** (A) and (B) Suppression of PTI by MP. (A) Perception of dsRNA produced in cortical ER-associated VRCs at the PM by an unknown cytoplasmic or membrane-associated pathogen recognition receptor (PRR) and the SERK1 co-receptor (with potential contribution by one or more other co-receptors) triggers a signaling pathway leading to callose deposition and PD closure. dsRNA produced during infection may require secretion into the apoplast to allow perception at the PM (dashed blue lines and arrows). Externally applied poly(I:C) may be perceived from the apoplast or secreted upon initial uptake by the cells (dashed gray lines and arrows). (B) MP suppresses dsRNA-triggered callose deposition and allows intercellular spread of the viral ribonucleoprotein complex (vRNP). The MP may interact with intracellular PTI signaling as indicated or interact with callose synthesizing or degrading enzymes at PD. The MP may also be secreted to inhibit dsRNA perception at the PM. (C) dsRNA triggers PTI and antiviral RNA silencing and both responses are suppressed by viral effector proteins to support virus propagation. Whereas MP acts in cells at the virus front to facilitate virus movement by blocking a dsRNA-induced callose defense response at PD, the VSR blocks dsRNA-induced antiviral RNA silencing in the center of infection sites to support virus replication and production of virus progeny. A local infection site of TMV encoding MP fused to GFP (TMV-MP:GFP, 7 dpi) in *N. benthamiana* is shown. Scale bar, 1 mm.

## Parsed Citations

Alexopoulou, L., Holt, A.C., Medzhitov, R., and Flavell, R.A. (2001). Recognition of double-stranded RNA and activation of NF-kappaB by Toll-like receptor 3. *Nature* 413, 732-738.

Google Scholar: [Author Only](#) [Title Only](#) [Author and Title](#)

Amari, K., Boutant, E., Hofmann, C., Schmitt-Keichinger, C., Fernandez-Calvino, L., Didier, P., Lerich, A., Mutterer, J., Thomas, C.L., Heinlein, M., Mély, Y., Maule, A.J., and Ritzenthaler, C. (2010). A family of plasmodesmal proteins with receptor-like properties for plant viral movement proteins. *PLoS Pathog* 6, e1001119.

Google Scholar: [Author Only](#) [Title Only](#) [Author and Title](#)

Ashby, J., Boutant, E., Seemanpillai, M., Groner, A., Sambade, A., Ritzenthaler, C., and Heinlein, M. (2006). Tobacco mosaic virus movement protein functions as a structural microtubule-associated protein. *J Virol* 80, 8329-8344.

Google Scholar: [Author Only](#) [Title Only](#) [Author and Title](#)

Beffa, R.S., Hofer, R.M., Thomas, M., and Meins, F., Jr. (1996). Decreased susceptibility to viral disease of [beta]-1,3-glucanase-deficient plants generated by antisense transformation. *Plant Cell* 8, 1001-1011.

Google Scholar: [Author Only](#) [Title Only](#) [Author and Title](#)

Benitez-Alfonso, Y., Faulkner, C., Pendle, A., Miyashima, S., Helariutta, Y., and Maule, A. (2013). Symplastic intercellular connectivity regulates lateral root patterning. *Dev Cell* 26, 136-147.

Google Scholar: [Author Only](#) [Title Only](#) [Author and Title](#)

Borniego, M.B., Karlin, D., Pena, E.J., Robles Luna, G., and Garcia, M.L. (2016). Bioinformatic and mutational analysis of ophiiovirus movement proteins, belonging to the 30K superfamily. *Virology* 498, 172-180.

Google Scholar: [Author Only](#) [Title Only](#) [Author and Title](#)

Boutant, E., Didier, P., Niehl, A., Mely, Y., Ritzenthaler, C., and Heinlein, M. (2010). Fluorescent protein recruitment assay for demonstration and analysis of in vivo protein interactions in plant cells and its application to Tobacco mosaic virus movement protein. *Plant J* 62, 171-177.

Google Scholar: [Author Only](#) [Title Only](#) [Author and Title](#)

Boyko, V., van der Laak, J., Ferralli, J., Suslova, E., Kwon, M.-O., and Heinlein, M. (2000). Cellular targets of functional and dysfunctional mutants of Tobacco mosaic virus movement protein fused to GFP. *J. Virol.* 74, 11339-11346.

Google Scholar: [Author Only](#) [Title Only](#) [Author and Title](#)

Boyko, V., Ashby, J.A., Suslova, E., Ferralli, J., Sterthaus, O., Deom, C.M., and Heinlein, M. (2002). Intramolecular complementing mutations in tobacco mosaic virus movement protein confirm a role for microtubule association in viral RNA transport. *J Virol* 76, 3974-3980.

Google Scholar: [Author Only](#) [Title Only](#) [Author and Title](#)

Brandner, K., Sambade, A., Boutant, E., Didier, P., Mély, Y., Ritzenthaler, C., and Heinlein, M. (2008). Tobacco mosaic virus movement protein interacts with green fluorescent protein-tagged microtubule end-binding protein 1. *Plant Physiol* 147, 611-623.

Google Scholar: [Author Only](#) [Title Only](#) [Author and Title](#)

Braut, M.L., Petit, J.D., Immel, F., Nicolas, W.J., Glavier, M., Brocard, L., Gaston, A., Fouche, M., Hawkins, T.J., Crowet, J.M., Grison, M.S., Germain, V., Rocher, M., Kraner, M., Alva, V., Claverol, S., Paterlini, A., Helariutta, Y., Deleu, M., Lins, L., Tilsner, J., and Bayer, E.M. (2019). Multiple C2 domains and transmembrane region proteins (MCTPs) tether membranes at plasmodesmata. *EMBO Rep* 20, e47182.

Google Scholar: [Author Only](#) [Title Only](#) [Author and Title](#)

Bucher, G.L., Tarina, C., Heinlein, M., Di Serio, F., Meins Jr., F., and Iglesias, V.A. (2001). Local expression of enzymatically active class 1 beta-1,3-glucanase enhances symptoms of TMV infection in tobacco. *Plant J.* 28, 361-369.

Google Scholar: [Author Only](#) [Title Only](#) [Author and Title](#)

Cai, Q., Qiao, L., Wang, M., He, B., Lin, F.-M., Palmquist, J., Huang, S.-D. and Jin, H. (2018). Plants send small RNAs in extracellular vesicles to fungal pathogen to silence virulence genes. *Science* 360, 1126.

Google Scholar: [Author Only](#) [Title Only](#) [Author and Title](#)

Cai, Q., He, B., Wang, S., Fletcher, S., Niu, D., Mitter, N., Birch, P.R.J., Jin, H. (2021). Message in a bubble: shuttling small RNAs and proteins between cells and interacting organisms using extracellular vesicles. *Annu Rev Plant Biol* 72, 497-524.

Google Scholar: [Author Only](#) [Title Only](#) [Author and Title](#)

Caillaud, M.C., Wirthmueller, L., Sklenar, J., Findlay, K., Piquerez, S.J., Jones, A.M., Robatzek, S., Jones, J.D., and Faulkner, C. (2014). The plasmodesmal protein PDL1 localises to haustoria-associated membranes during downy mildew infection and regulates callose deposition. *PLoS Pathog* 10, e1004496.

Google Scholar: [Author Only](#) [Title Only](#) [Author and Title](#)

Castro, B., Citterico, M., Kimura, S., Stevens, D.M., Wrzaczek, M., and Coaker, G. (2021). Stress-induced reactive oxygen species compartmentalization, perception and signalling. *Nat Plants* 7, 403-412.



Google Scholar: [Author Only](#) [Title Only](#) [Author and Title](#)

**Chen, M.H., Shen, J., Hind, G., Handa, A.K., and Citovsky, V. (2000).** Interaction between the tobacco mosaic virus movement protein and host cell pectin methylesterases is required for viral cell-to-cell movement. *EMBO J* 19, 913-920.

Google Scholar: [Author Only](#) [Title Only](#) [Author and Title](#)

**Cheval, C., and Faulkner, C. (2018).** Plasmodesmal regulation during plant-pathogen interactions. *New Phytol* 217, 62-67.

Google Scholar: [Author Only](#) [Title Only](#) [Author and Title](#)

**Cheval, C., Samwald, S., Johnston, M.G., de Keijzer, J., Breakspear, A., Liu, X., Bellandi, A., Kadota, Y., Zipfel, C., and Faulkner, C. (2020).** Chitin perception in plasmodesmata characterizes submembrane immune-signaling specificity in plants. *Proc Natl Acad Sci U S A* 117, 9621-9629.

Google Scholar: [Author Only](#) [Title Only](#) [Author and Title](#)

**Christensen, N., Tilsner, J., Bell, K., Hammann, P., Parton, R., Lacomme, C., and Oparka, K. (2009).** The 5' cap of Tobacco mosaic virus (TMV) is required for virion attachment to the actin/endoplasmic reticulum network during early infection. *Traffic* 10, 536-551.

Google Scholar: [Author Only](#) [Title Only](#) [Author and Title](#)

**Citovsky, V. (1999).** Tobacco mosaic virus: a pioneer of cell-to-cell movement. *Philos Trans R Soc Lond B Biol Sci* 354, 637-643.

Google Scholar: [Author Only](#) [Title Only](#) [Author and Title](#)

**Citovsky, V., Knorr, D., Schuster, G., and Zambryski, P. (1990).** The P30 movement protein of Tobacco mosaic virus is a single-strand nucleic acid binding protein. *Cell* 60, 637-647.

Google Scholar: [Author Only](#) [Title Only](#) [Author and Title](#)

**Csorba, T., Kontra, L., and Burgyan, J. (2015).** Viral silencing suppressors: Tools forged to fine-tune host-pathogen coexistence. *Virology* 479-480C, 85-103.

Google Scholar: [Author Only](#) [Title Only](#) [Author and Title](#)

**Czechowski, T., Stitt, M., Altmann, T., Udvardi, M.K., and Scheible, W.R. (2005).** Genome-wide identification and testing of superior reference genes for transcript normalization in *Arabidopsis*. *Plant Physiol* 139, 5-17.

Google Scholar: [Author Only](#) [Title Only](#) [Author and Title](#)

**De Storme, N., and Geelen, D. (2014).** Callose homeostasis at plasmodesmata: molecular regulators and developmental relevance. *Front Plant Sci* 5, 138.

Google Scholar: [Author Only](#) [Title Only](#) [Author and Title](#)

**DeFalco, T.A., and Zipfel, C. (2021).** Molecular mechanisms of early plant pattern-triggered immune signaling. *Mol Cell* 81, 3449-3467.

Google Scholar: [Author Only](#) [Title Only](#) [Author and Title](#)

**Ding, B., Haudenschild, J.S., Hull, R.J., Wolf, S., Beachy, R.N., and Lucas, W.J. (1992).** Secondary plasmodesmata are specific sites of localization of the Tobacco mosaic virus movement protein in transgenic tobacco plants. *Plant Cell* 4, 915-928.

Google Scholar: [Author Only](#) [Title Only](#) [Author and Title](#)

**Ding, S.W., and Voinnet, O. (2007).** Antiviral immunity directed by small RNAs. *Cell* 130, 413-426.

Google Scholar: [Author Only](#) [Title Only](#) [Author and Title](#)

**Dolja, V.V., Krupovic, M., and Koonin, E.V. (2020).** Deep roots and splendid boughs of the global plant virome. *Annu Rev Phytopathol* 58, 23-53.

Google Scholar: [Author Only](#) [Title Only](#) [Author and Title](#)

**Fatyl, K., Fekete, K.A., and Ludman, M. (2020).** Double-stranded-RNA-binding protein 2 participates in antiviral defense. *J Virol* 94, e00017-20.

Google Scholar: [Author Only](#) [Title Only](#) [Author and Title](#)

**Faulkner, C., Petutschnig, E., Benitez-Alfonso, Y., Beck, M., Robatzek, S., Lipka, V., and Maule, A.J. (2013).** LYM2-dependent chitin perception limits molecular flux via plasmodesmata. *Proc Natl Acad Sci U S A* 110, 9166-9170.

Google Scholar: [Author Only](#) [Title Only](#) [Author and Title](#)

**Guenoune-Gelbart, D., Elbaum, M., Sagi, G., Levy, A., and Epel, B.L. (2008).** Tobacco mosaic virus (TMV) replicase and movement protein function synergistically in facilitating TMV spread by lateral diffusion in the plasmodesmal desmotubule of *Nicotiana benthamiana*. *Mol Plant Microbe Interact* 21, 335-345.

Google Scholar: [Author Only](#) [Title Only](#) [Author and Title](#)

**Guseman, J.M., Lee, J.S., Bogenschutz, N.L., Peterson, K.M., Virata, R.E., Xie, B., Kanaoka, M.M., Hong, Z., and Torii, K.U. (2010).** Dysregulation of cell-to-cell connectivity and stomatal patterning by loss-of-function mutation in *Arabidopsis* chorus (glucan synthase-like 8). *Development* 137, 1731-1741.

Google Scholar: [Author Only](#) [Title Only](#) [Author and Title](#)



- He, P., Shan, L., and Sheen, J. (2007). The use of protoplasts to study innate immune responses. *Methods Mol Biol* 354, 1-9.  
Google Scholar: [Author Only](#) [Title Only](#) [Author and Title](#)
- Heinlein, M. (2015). Plant virus replication and movement. *Virology* 479-480, 657-671.  
Google Scholar: [Author Only](#) [Title Only](#) [Author and Title](#)
- Heinlein, M., Epel, B.L., Padgett, H.S., and Beachy, R.N. (1995). Interaction of tobamovirus movement proteins with the plant cytoskeleton. *Science* 270, 1983-1985.  
Google Scholar: [Author Only](#) [Title Only](#) [Author and Title](#)
- Heinlein, M., Wood, M.R., Thiel, T., and Beachy, R.N. (1998). Targeting and modification of prokaryotic cell-cell junctions by Tobacco mosaic virus cell-to-cell movement protein. *Plant J* 14, 345-351.  
Google Scholar: [Author Only](#) [Title Only](#) [Author and Title](#)
- Holdaway-Clarke, T.L., Walker, N.A., Hepler, P.K., and Overall, R.L. (2000). Physiological elevations in cytoplasmic free calcium by cold or ion injection result in transient closure of higher plant plasmodesmata. *Planta* 210, 329-335.  
Google Scholar: [Author Only](#) [Title Only](#) [Author and Title](#)
- Horsch, A.B., Fry, J.E., Hoffmann, N.L., Eichholtz, D., Rogers, S.G., and Fraley, R.T. (1985). A simple and general method for transferring genes into plants. *Science* 227, 1229-1231.  
Google Scholar: [Author Only](#) [Title Only](#) [Author and Title](#)
- Hu, S., Yin, Y., Chen, B., Lin, Q., Tian, Y., Song, X., Peng, J., Zheng, H., Rao, S., Wu, G., Mo, X., Yan, F., Chen, J., and Lu, Y. (2021). Identification of viral particles in the apoplast of *Nicotiana benthamiana* leaves infected by potato virus X. *Mol Plant Pathol* 22, 456-464.  
Google Scholar: [Author Only](#) [Title Only](#) [Author and Title](#)
- Huang, C., and Heinlein, M. (2022). Function of plasmodesmata in the interaction of plants with microbes and viruses. *Methods Mol Biol* 2457, 23-54.  
Google Scholar: [Author Only](#) [Title Only](#) [Author and Title](#)
- Huang, C., Mutterer, J., and Heinlein, M. (2022). In vivo aniline blue staining and semi-automated quantification of callose deposition at plasmodesmata. *Methods Mol Biol* 2457, 151-165.  
Google Scholar: [Author Only](#) [Title Only](#) [Author and Title](#)
- Huang, C.Y., Wang, H., Hu, P., Hamby, R., and Jin, H. (2019) Small RNAs – Big players in plant-microbe interactions. *Cell Host Microbe* 26, 173-182.  
Google Scholar: [Author Only](#) [Title Only](#) [Author and Title](#)
- Iglesias, V.A., and Meins, F., Jr. (2000). Movement of plant viruses is delayed in a  $\beta$ -1,3-glucanase-deficient mutant showing a reduced plasmodesmatal size exclusion limit and enhanced callose deposition. *Plant J.* 21, 157-166.  
Google Scholar: [Author Only](#) [Title Only](#) [Author and Title](#)
- Incarbone, M., Clavel, M., Monsion, B., Kuhn, L., Scheer, H., Vantard, E., Poignavent, V., Dunoyer, P., Genschik, P., and Ritzenhaller, C. (2021). Immunocapture of dsRNA-bound proteins provides insight into Tobacco rattle virus replication complexes and reveals *Arabidopsis* DRB2 to be a wide-spectrum antiviral effector. *Plant Cell* 33, 3402-3420.  
Google Scholar: [Author Only](#) [Title Only](#) [Author and Title](#)
- Ishikawa, K., Tamura, K., Fukao, Y., and Shimada, T. (2020). Structural and functional relationships between plasmodesmata and plant endoplasmic reticulum-plasma membrane contact sites consisting of three synaptotagmins. *New Phytol* 226, 798-808.  
Google Scholar: [Author Only](#) [Title Only](#) [Author and Title](#)
- Jones, R.A.C. (2021). Global plant virus disease pandemics and epidemics. *Plants (Basel)* 10, 233.  
Google Scholar: [Author Only](#) [Title Only](#) [Author and Title](#)
- Jones, R.A.C., and Naidu, R.A. (2019). Global dimensions of plant virus diseases: Current status and future perspectives. *Annu Rev Virol* 6, 387-409.  
Google Scholar: [Author Only](#) [Title Only](#) [Author and Title](#)
- Kadota, Y., Sklenar, J., Derbyshire, P., Stransfeld, L., Asai, S., Ntoukakis, V., Jones, J.D., Shirasu, K., Menke, F., Jones, A., and Zipfel, C. (2014). Direct regulation of the NADPH oxidase RBOHD by the PRR-associated kinase BIK1 during plant immunity. *Mol Cell* 54, 43-55.  
Google Scholar: [Author Only](#) [Title Only](#) [Author and Title](#)
- Koch, A., Biedenkopf, D., Furch, A., Weber, L., Roszbach, O., Abdellatef, E., Linicus, L., Johannsmäier, J., Jelonek, L., Goesmann, A., Cardoza, V., Mcmillan, J., Mentzel, T. and Kogel, K.-H. (2016). An RNAi-based control of *Fusarium graminearum* infections through spraying of long dsRNAs involves a plant passage and is controlled by the fungal silencing machinery. *PLoS Pathog* 12, e1005901.  
Google Scholar: [Author Only](#) [Title Only](#) [Author and Title](#)

- Kørner, C.J., Klauser, D., Niehl, A., Dominguez-Ferreras, A., Chinchilla, D., Boller, T., Heinlein, M., and Hann, D.R. (2013). The immunity regulator BAK1 contributes to resistance against diverse RNA viruses. *Mol Plant Microbe Interact* 26, 1271-1280.  
Google Scholar: [Author Only](#) [Title Only](#) [Author and Title](#)
- Kubota, K., Tsuda, S., Tamai, A., and Meshi, T. (2003). Tomato mosaic virus replication protein suppresses virus-targeted posttranscriptional gene silencing. *J Virol* 77, 11016-11026.  
Google Scholar: [Author Only](#) [Title Only](#) [Author and Title](#)
- Lee, J.Y., and Lucas, W.J. (2001). Phosphorylation of viral movement proteins--regulation of cell-to-cell trafficking. *Trends Microbiol* 9, 5-8.  
Google Scholar: [Author Only](#) [Title Only](#) [Author and Title](#)
- Lee, J.Y., Wang, X., Cui, W., Sager, R., Modla, S., Czymbek, K., Zybaliyov, B., van Wijk, K., Zhang, C., Lu, H., and Lakshmanan, V. (2011). A plasmodesmata-localized protein mediates crosstalk between cell-to-cell communication and innate immunity in *Arabidopsis*. *Plant Cell* 23, 3353-3373.  
Google Scholar: [Author Only](#) [Title Only](#) [Author and Title](#)
- Levy, A., Zheng, J.Y., and Lazarowitz, S.G. (2015). Synaptotagmin SYTA forms ER-plasma membrane junctions that are recruited to plasmodesmata for plant virus movement. *Curr Biol* 25, 2018-2025.  
Google Scholar: [Author Only](#) [Title Only](#) [Author and Title](#)
- Levy, A., Erlanger, M., Rosenthal, M., and Epel, B.L. (2007). A plasmodesmata-associated beta-1,3-glucanase in *Arabidopsis*. *Plant J* 49, 669-682.  
Google Scholar: [Author Only](#) [Title Only](#) [Author and Title](#)
- Li, F., Cheng, C., Cui, F., de Oliveira, M.V., Yu, X., Meng, X., Intorne, A.C., Babilonia, K., Li, M., Li, B., Chen, S., Ma, X., Xiao, S., Zheng, Y., Fei, Z., Metz, R.P., Johnson, C.D., Koiwa, H., Sun, W., Li, Z., de Souza Filho, G.A., Shan, L., and He, P. (2014). Modulation of RNA polymerase II phosphorylation downstream of pathogen perception orchestrates plant immunity. *Cell Host Microbe* 16, 748-758.  
Google Scholar: [Author Only](#) [Title Only](#) [Author and Title](#)
- Lim, G.H., Shine, M.B., de Lorenzo, L., Yu, K., Cui, W., Navarre, D., Hunt, A.G., Lee, J.Y., Kachroo, A., and Kachroo, P. (2016). Plasmodesmata localizing proteins regulate transport and signaling during systemic acquired immunity in plants. *Cell Host Microbe* 19, 541-549.  
Google Scholar: [Author Only](#) [Title Only](#) [Author and Title](#)
- Liu, Z., Wu, Y., Yang, F., Zhang, Y., Chen, S., Xie, Q., Tian, X., and Zhou, J.M. (2013). BIK1 interacts with PEPRs to mediate ethylene-induced immunity. *Proc Natl Acad Sci U S A* 110, 6205-6210.  
Google Scholar: [Author Only](#) [Title Only](#) [Author and Title](#)
- Lu, D., Wu, S., Gao, X., Zhang, Y., Shan, L., and He, P. (2010). A receptor-like cytoplasmic kinase, BIK1, associates with a flagellin receptor complex to initiate plant innate immunity. *Proc Natl Acad Sci U S A* 107, 496-501.  
Google Scholar: [Author Only](#) [Title Only](#) [Author and Title](#)
- Ma, X., Claus, L.A.N., Leslie, M.E., Tao, K., Wu, Z., Liu, J., Yu, X., Li, B., Zhou, J., Savatin, D.V., Peng, J., Tyler, B.M., Heese, A., Russinova, E., He, P., and Shan, L. (2020). Ligand-induced monoubiquitination of BIK1 regulates plant immunity. *Nature* 581, 199-203.  
Google Scholar: [Author Only](#) [Title Only](#) [Author and Title](#)
- Mansilla, C., Sanchez, F., Padgett, H.S., Pogue, G.P., and Ponz, F. (2009). Chimeras between Oilseed rape mosaic virus and Tobacco mosaic virus highlight the relevant role of the tobamoviral RdRp as pathogenicity determinant in several hosts. *Mol Plant Pathol* 10, 59-68.  
Google Scholar: [Author Only](#) [Title Only](#) [Author and Title](#)
- Meng, X., Shan, L., and He, P. (2015a). Stack heterotrimeric G proteins and MAPK cascades on a RACK. *Mol Plant* 8, 1691-1693.  
Google Scholar: [Author Only](#) [Title Only](#) [Author and Title](#)
- Meng, X., Chen, X., Mang, H., Liu, C., Yu, X., Gao, X., Torii, K.U., He, P., and Shan, L. (2015b). Differential function of *Arabidopsis* SERK family receptor-like kinases in stomatal patterning. *Curr Biol* 25, 2361-2372.  
Google Scholar: [Author Only](#) [Title Only](#) [Author and Title](#)
- Mittler, R. (2017). ROS are good. *Trends Plant Sci* 22, 11-19.  
Google Scholar: [Author Only](#) [Title Only](#) [Author and Title](#)
- Movahed, N., Cabanillas, D.G., Wan, J., Vali, H., Laliberte, J.F., and Zheng, H. (2019). Turnip mosaic virus components are released into the extracellular space by vesicles in infected leaves. *Plant Physiol* 180, 1375-1388.  
Google Scholar: [Author Only](#) [Title Only](#) [Author and Title](#)
- Monsion, B., Incarbone, M., Hleibieh, K., Poignavent, V., Ghannam, A., Dunoyer, P., Daeffler, L., Tilsner, J., and Ritzenthaler, C. (2018). Efficient detection of long dsRNA in vitro and in vivo using the dsRNA binding domain from FHV B2 protein. *Front Plant*

Sci 9, 70.

Google Scholar: [Author Only](#) [Title Only](#) [Author and Title](#)

Moore, P.J., Fenczik, C.A., Deom, C.M., and Beachy, R.N. (1992). Developmental changes in plasmodesmata in transgenic tobacco expressing the movement protein of Tobacco mosaic virus. *Protoplasma* 170, 115-127.

Google Scholar: [Author Only](#) [Title Only](#) [Author and Title](#)

Niehl, A., and Heinlein, M. (2019). Perception of double-stranded RNA in plant antiviral immunity. *Mole Plant Pathol* 20, 1203-1210.

Google Scholar: [Author Only](#) [Title Only](#) [Author and Title](#)

Niehl, A., Wyrsh, I., Boller, T., and Heinlein, M. (2016). Double-stranded RNAs induce a pattern-triggered immune signaling pathway in plants. *New Phytol* 211, 1008-1019.

Google Scholar: [Author Only](#) [Title Only](#) [Author and Title](#)

Niehl, A., Sojininen, M., Poranen, M.M., and Heinlein, M. (2018). Synthetic biology approach for plant protection using dsRNA. *Plant Biotechnol J* 16, 1679-1687.

Google Scholar: [Author Only](#) [Title Only](#) [Author and Title](#)

Niehl, A., Amari, K., Gereige, D., Brandner, K., Mély, Y., and Heinlein, M. (2012). Control of Tobacco mosaic virus movement protein fate by CELL-DIVISION-CYCLE protein 48 (CDC48). *Plant Physiol* 160, 2093-2108.

Google Scholar: [Author Only](#) [Title Only](#) [Author and Title](#)

Nuhse, T.S., Bottrill, A.R., Jones, A.M., and Peck, S.C. (2007). Quantitative phosphoproteomic analysis of plasma membrane proteins reveals regulatory mechanisms of plant innate immune responses. *Plant J* 51, 931-940.

Google Scholar: [Author Only](#) [Title Only](#) [Author and Title](#)

Oparka, K.J., Prior, D.A.M., Santa Cruz, S., Padgett, H.S., and Beachy, R.N. (1997). Gating of epidermal plasmodesmata is restricted to the leading edge of expanding infection sites of Tobacco mosaic virus. *Plant J.* 12, 781-789.

Google Scholar: [Author Only](#) [Title Only](#) [Author and Title](#)

Pitzalis, N., and Heinlein, M. (2017). The roles of membranes and associated cytoskeleton in plant virus replication and cell-to-cell movement. *J Exp Bot* 69, 117-132.

Google Scholar: [Author Only](#) [Title Only](#) [Author and Title](#)

Ruf, A., Oberkofler, L., Robatzek, S., and Weiberg, A. (2022). Spotlight on plant RNA-containing extracellular vesicles. *Curr Opin Plant Biol* 69, 102272.

Google Scholar: [Author Only](#) [Title Only](#) [Author and Title](#)

Sambade, A., Brandner, K., Hofmann, C., Seemanpillai, M., Mutterer, J., and Heinlein, M. (2008). Transport of TMV movement protein particles associated with the targeting of RNA to plasmodesmata. *Traffic* 9, 2073-2088.

Google Scholar: [Author Only](#) [Title Only](#) [Author and Title](#)

Simpson, C., Thomas, C., Findlay, K., Bayer, E., and Maule, A.J. (2009). An Arabidopsis GPI-anchor plasmodesmal neck protein with callose binding activity and potential to regulate cell-to-cell trafficking. *Plant Cell* 21, 581-594.

Google Scholar: [Author Only](#) [Title Only](#) [Author and Title](#)

Tan, X., Sun, L., Chen, J., and Chen, Z.J. (2018). Detection of Microbial infections through innate immune sensing of nucleic acids. *Annu Rev Microbiol* 72, 447-478.

Google Scholar: [Author Only](#) [Title Only](#) [Author and Title](#)

Thomas, C.L., Bayer, E.M., Ritzenthaler, C., Fernandez-Calvino, L., and Maule, A.J. (2008). Specific targeting of a plasmodesmal protein affecting cell-to-cell communication. *PLoS Biol* 6, e7.

Google Scholar: [Author Only](#) [Title Only](#) [Author and Title](#)

Thor, K., Jiang, S., Michard, E., George, J., Scherzer, S., Huang, S., Dindas, J., Derbyshire, P., Leitao, N., DeFalco, T.A., Koster, P., Hunter, K., Kimura, S., Gronnier, J., Stransfeld, L., Kadota, Y., Bucherl, C.A., Charpentier, M., Wrzaczek, M., MacLean, D., Oldroyd, G.E.D., Menke, F.L.H., Roelfsema, M.R.G., Hedrich, R., Feijo, J., and Zipfel, C. (2020). The calcium-permeable channel OSCA1.3 regulates plant stomatal immunity. *Nature* 585, 569-573.

Google Scholar: [Author Only](#) [Title Only](#) [Author and Title](#)

Tian, W., Hou, C., Ren, Z., Wang, C., Zhao, F., Dahlbeck, D., Hu, S., Zhang, L., Niu, Q., Li, L., Staskawicz, B.J., and Luan, S. (2019). A calmodulin-gated calcium channel links pathogen patterns to plant immunity. *Nature* 572, 131-135.

Google Scholar: [Author Only](#) [Title Only](#) [Author and Title](#)

Tilsner, J., Nicolas, W., Rosado, A., and Bayer, E.M. (2016). Staying tight: Plasmodesmal membrane contact sites and the control of cell-to-cell connectivity in plants. *Annu Rev Plant Biol* 67, 337-364.

Google Scholar: [Author Only](#) [Title Only](#) [Author and Title](#)

Torres, M.A., Dangl, J.L., and Jones, J.D. (2002). Arabidopsis gp91phox homologues AtrbohD and AtrbohF are required for accumulation of reactive oxygen intermediates in the plant defense response. *Proc Natl Acad Sci U S A* 99, 517-522.

Google Scholar: [Author Only](#) [Title Only](#) [Author and Title](#)

**Tucker, E.B., and Boss, W.F. (1996).** Mastoparan induced intracellular Ca<sup>2+</sup> fluxes may regulate cell-to-cell communication in plants. *Plant Physiol.* 111, 459-467.

Google Scholar: [Author Only](#) [Title Only](#) [Author and Title](#)

**Uchiyama, A., Shimada-Beltran, H., Levy, A., Zheng, J.Y., Javia, P.A., and Lazarowitz, S.G. (2014).** The Arabidopsis synaptotagmin SYTA regulates the cell-to-cell movement of diverse plant viruses. *Front Plant Sci* 5, 584.

Google Scholar: [Author Only](#) [Title Only](#) [Author and Title](#)

**Vatén, A., Dettmer, J., Wu, S., Stierhof, Y.D., Miyashima, S., Yadav, S.R., Roberts, C.J., Campilho, A., Bulone, V., Lichtenberger, R., Lehesranta, S., Mahonen, A.P., Kim, J.Y., Jokitalo, E., Sauer, N., Scheres, B., Nakajima, K., Carlsbecker, A., Gallagher, K.L., and Helariutta, Y. (2011).** Callose biosynthesis regulates symplastic trafficking during root development. *Dev Cell* 21, 1144-1155.

Google Scholar: [Author Only](#) [Title Only](#) [Author and Title](#)

**Vogler, H., Kwon, M.O., Dang, V., Sambade, A., Fasler, M., Ashby, J., and Heinlein, M. (2008).** Tobacco mosaic virus movement protein enhances the spread of RNA silencing. *PLoS Pathog* 4, e1000038.

Google Scholar: [Author Only](#) [Title Only](#) [Author and Title](#)

**Vogler, H., Akbergenov, R., Shivaprasad, P.V., Dang, V., Fasler, M., Kwon, M.O., Zhanybekova, S., Hohn, T., and Heinlein, M. (2007).** Modification of small RNAs associated with suppression of RNA silencing by tobamovirus replicase protein. *J Virol* 81, 10379-10388.

Google Scholar: [Author Only](#) [Title Only](#) [Author and Title](#)

**Wan, J., Cabanillas, D.G., Zheng, H. and Laliberté, J.-F. (2015).** Turnip mosaic virus moves systemically through both phloem and xylem as membrane-associated complexes. *Plant Physiol* 167, 1374-1388.

Google Scholar: [Author Only](#) [Title Only](#) [Author and Title](#)

**Wan, J. and Laliberté, J.-F. (2015).** Membrane-associated virus replication complexes locate to plant conducting tubes. *Plant Signal Behav* 10, e1042639–e1042639.

Google Scholar: [Author Only](#) [Title Only](#) [Author and Title](#)

**Wang, X., Sager, R., Cui, W., Zhang, C., Lu, H., and Lee, J.Y. (2013).** Salicylic acid regulates plasmodesmata closure during innate immune responses in Arabidopsis. *Plant Cell* 25, 2315-2329.

Google Scholar: [Author Only](#) [Title Only](#) [Author and Title](#)

**Wu, S.W., Kumar, R., Iswanto, A.B.B., and Kim, J.Y. (2018).** Callose balancing at plasmodesmata. *J Exp Bot* 69, 5325-5339.

Google Scholar: [Author Only](#) [Title Only](#) [Author and Title](#)

**Xu, B., Cheval, C., Laohavisit, A., Hocking, B., Chiasson, D., Olsson, T.S.G., Shirasu, K., Faulkner, C., and Gilliam, M. (2017).** A calmodulin-like protein regulates plasmodesmal closure during bacterial immune responses. *New Phytol* 215, 77-84.

Google Scholar: [Author Only](#) [Title Only](#) [Author and Title](#)

**Yuan, C., Lazarowitz, S.G., and Citovsky, V. (2018).** The plasmodesmal localization signal of TMV MP is recognized by plant synaptotagmin SYTA. *mBio* 9, e01314-18.

Google Scholar: [Author Only](#) [Title Only](#) [Author and Title](#)

**Zhang, J., Li, W., Xiang, T., Liu, Z., Laluk, K., Ding, X., Zou, Y., Gao, M., Zhang, X., Chen, S., Mengiste, T., Zhang, Y., and Zhou, J.M. (2010).** Receptor-like cytoplasmic kinases integrate signaling from multiple plant immune receptors and are targeted by a *Pseudomonas syringae* effector. *Cell Host Microbe* 7, 290-301.

Google Scholar: [Author Only](#) [Title Only](#) [Author and Title](#)
